# Supplementary material
Source: PubMed Central journal article supplement (PMC3711126)
Supplement: jf401570x_si_001.pdf [file jf401570x_si_001.pdf]

## Trial Design

### Block I

N100 S15

|    |    |    |    |     |     |    |    |     |    |     |     |     |
|----|----|----|----|-----|-----|----|----|-----|----|-----|-----|-----|
| LR | PD | UR | KE | Sat | Dai | MP | LC | Ver | RB | Var | Her | Har |
|----|----|----|----|-----|-----|----|----|-----|----|-----|-----|-----|

N200 S15

|     |     |    |    |     |     |     |    |    |    |    |     |    |
|-----|-----|----|----|-----|-----|-----|----|----|----|----|-----|----|
| Dai | Her | LC | KE | Har | Ver | Var | UR | RB | PD | MP | Sat | LR |
|-----|-----|----|----|-----|-----|-----|----|----|----|----|-----|----|

N100 S40

|     |    |     |    |    |    |     |     |     |     |    |    |    |
|-----|----|-----|----|----|----|-----|-----|-----|-----|----|----|----|
| Var | KE | Sat | RB | UR | LC | Har | Her | Dai | Ver | PD | MP | LR |
|-----|----|-----|----|----|----|-----|-----|-----|-----|----|----|----|

N200 S0

|    |    |     |    |    |     |    |     |     |     |    |    |     |
|----|----|-----|----|----|-----|----|-----|-----|-----|----|----|-----|
| LC | UR | Dai | KE | RB | Ver | PD | Har | Her | Var | LR | MP | Sat |
|----|----|-----|----|----|-----|----|-----|-----|-----|----|----|-----|

N100 S0

|    |     |    |    |    |     |     |    |    |    |     |     |     |
|----|-----|----|----|----|-----|-----|----|----|----|-----|-----|-----|
| UR | Dai | LR | RB | MP | Her | Ver | PD | KE | LC | Var | Har | Sat |
|----|-----|----|----|----|-----|-----|----|----|----|-----|-----|-----|

N200 S40

|    |     |     |     |    |    |    |     |    |    |     |    |     |
|----|-----|-----|-----|----|----|----|-----|----|----|-----|----|-----|
| LR | Var | Her | Ver | LC | KE | UR | Dai | RB | MP | Har | PD | Sat |
|----|-----|-----|-----|----|----|----|-----|----|----|-----|----|-----|

N0 S40

|     |    |     |    |    |     |     |    |    |    |    |     |     |
|-----|----|-----|----|----|-----|-----|----|----|----|----|-----|-----|
| Ver | MP | Sat | UR | PD | Dai | Her | RB | LC | KE | LR | Var | Har |
|-----|----|-----|----|----|-----|-----|----|----|----|----|-----|-----|

N0 S15

|    |    |     |     |    |     |     |    |     |     |    |    |    |
|----|----|-----|-----|----|-----|-----|----|-----|-----|----|----|----|
| LR | PD | Dai | Ver | MP | Sat | Her | UR | Var | Har | RB | LC | KE |
|----|----|-----|-----|----|-----|-----|----|-----|-----|----|----|----|

N0 S0

|     |    |     |    |    |    |    |     |     |    |     |    |     |
|-----|----|-----|----|----|----|----|-----|-----|----|-----|----|-----|
| Her | UR | Ver | PD | RB | LC | MP | Sat | Har | KE | Var | LR | Dai |
|-----|----|-----|----|----|----|----|-----|-----|----|-----|----|-----|

### Block II

N0 S40

|    |    |     |    |    |     |    |    |     |     |     |    |     |
|----|----|-----|----|----|-----|----|----|-----|-----|-----|----|-----|
| RB | PD | Sat | UR | LC | Her | KE | LR | Dai | Har | Ver | MP | Var |
|----|----|-----|----|----|-----|----|----|-----|-----|-----|----|-----|

N200 S40

|    |     |     |    |     |    |    |     |     |    |    |    |     |
|----|-----|-----|----|-----|----|----|-----|-----|----|----|----|-----|
| LR | Har | Her | MP | Dai | KE | UR | Var | Sat | LC | PD | RB | Ver |
|----|-----|-----|----|-----|----|----|-----|-----|----|----|----|-----|

N0 S0

|     |    |     |     |    |    |    |     |     |    |     |    |    |
|-----|----|-----|-----|----|----|----|-----|-----|----|-----|----|----|
| Ver | UR | Dai | Har | KE | PD | LR | Sat | Var | MP | Her | RB | LC |
|-----|----|-----|-----|----|----|----|-----|-----|----|-----|----|----|

N0 S15

|     |    |     |    |    |    |     |     |     |    |     |    |    |
|-----|----|-----|----|----|----|-----|-----|-----|----|-----|----|----|
| Dai | MP | Her | LR | PD | RB | Var | Ver | Sat | UR | Har | LC | KE |
|-----|----|-----|----|----|----|-----|-----|-----|----|-----|----|----|

N100 S15

|     |    |    |    |     |     |     |    |     |    |    |     |    |
|-----|----|----|----|-----|-----|-----|----|-----|----|----|-----|----|
| Sat | LR | LC | MP | Var | Her | Ver | UR | Har | PD | RB | Dai | KE |
|-----|----|----|----|-----|-----|-----|----|-----|----|----|-----|----|

N200 S0

|     |    |    |    |    |     |    |    |     |    |     |     |     |
|-----|----|----|----|----|-----|----|----|-----|----|-----|-----|-----|
| Her | PD | RB | UR | LR | Ver | MP | KE | Var | LC | Har | Sat | Dai |
|-----|----|----|----|----|-----|----|----|-----|----|-----|-----|-----|

N200 S15

|     |     |    |    |    |    |     |    |    |     |    |     |     |
|-----|-----|----|----|----|----|-----|----|----|-----|----|-----|-----|
| Dai | Her | LC | KE | LR | RB | Sat | MP | PD | Har | UR | Ver | Var |
|-----|-----|----|----|----|----|-----|----|----|-----|----|-----|-----|

N100 S0

|    |    |     |    |     |    |    |    |     |     |     |     |    |
|----|----|-----|----|-----|----|----|----|-----|-----|-----|-----|----|
| LR | PD | Sat | KE | Har | UR | RB | MP | Her | Ver | Dai | Var | LC |
|----|----|-----|----|-----|----|----|----|-----|-----|-----|-----|----|

N100 S40

|    |    |    |     |    |    |     |    |     |     |     |     |    |
|----|----|----|-----|----|----|-----|----|-----|-----|-----|-----|----|
| LC | LR | RB | Har | UR | MP | Her | PD | Ver | Var | Sat | Dai | KE |
|----|----|----|-----|----|----|-----|----|-----|-----|-----|-----|----|

### Block III

N100 S0

|     |    |     |    |     |     |    |    |    |     |     |    |    |
|-----|----|-----|----|-----|-----|----|----|----|-----|-----|----|----|
| Dai | LC | Ver | LR | Var | Sat | KE | MP | RB | Har | Her | UR | PD |
|-----|----|-----|----|-----|-----|----|----|----|-----|-----|----|----|

N0 S40

|    |     |    |    |     |    |     |     |    |    |    |     |     |
|----|-----|----|----|-----|----|-----|-----|----|----|----|-----|-----|
| MP | Dai | LC | LR | Sat | UR | Ver | Var | RB | PD | KE | Her | Har |
|----|-----|----|----|-----|----|-----|-----|----|----|----|-----|-----|

N200 S15

|    |    |     |    |     |     |    |    |     |     |    |    |     |
|----|----|-----|----|-----|-----|----|----|-----|-----|----|----|-----|
| RB | MP | Har | LC | Var | Ver | KE | UR | Her | Dai | PD | LR | Sat |
|----|----|-----|----|-----|-----|----|----|-----|-----|----|----|-----|

NO S0

|     |     |    |    |    |    |     |     |    |     |    |     |    |
|-----|-----|----|----|----|----|-----|-----|----|-----|----|-----|----|
| Her | Har | PD | MP | RB | LR | Sat | Var | KE | Ver | UR | Dai | LC |
|-----|-----|----|----|----|----|-----|-----|----|-----|----|-----|----|

N100 S15

|     |     |    |    |    |    |     |    |     |     |    |    |     |
|-----|-----|----|----|----|----|-----|----|-----|-----|----|----|-----|
| Ver | Har | LC | PD | UR | LR | Her | MP | Var | Dai | KE | RB | Sat |
|-----|-----|----|----|----|----|-----|----|-----|-----|----|----|-----|

NO S15

|     |     |     |    |    |     |    |    |    |     |    |     |    |
|-----|-----|-----|----|----|-----|----|----|----|-----|----|-----|----|
| Dai | Ver | Sat | PD | LR | Her | MP | RB | KE | Har | LC | Var | UR |
|-----|-----|-----|----|----|-----|----|----|----|-----|----|-----|----|

N100 S40

|    |    |     |     |    |     |    |     |    |    |     |     |    |
|----|----|-----|-----|----|-----|----|-----|----|----|-----|-----|----|
| MP | LC | Dai | Har | KE | Her | PD | Var | RB | LR | Sat | Ver | UR |
|----|----|-----|-----|----|-----|----|-----|----|----|-----|-----|----|

N200 S0

|     |     |    |    |    |     |     |    |    |    |     |    |     |
|-----|-----|----|----|----|-----|-----|----|----|----|-----|----|-----|
| Har | Sat | MP | KE | UR | Ver | Var | LR | LC | RB | Dai | PD | Her |
|-----|-----|----|----|----|-----|-----|----|----|----|-----|----|-----|

N200 S40

|     |    |    |    |    |    |     |     |     |    |     |     |    |
|-----|----|----|----|----|----|-----|-----|-----|----|-----|-----|----|
| Her | LR | MP | LC | PD | RB | Ver | Sat | Har | UR | Dai | Var | KE |
|-----|----|----|----|----|----|-----|-----|-----|----|-----|-----|----|

## Meteorological data for Woburn Experimental Farm, April to October 201

|           | Sunshine |         | Temperature °C |             | Rain |         |       |          |
|-----------|----------|---------|----------------|-------------|------|---------|-------|----------|
|           | Hours    | ( )     | Maximum ( )    | Minimum ( ) | mm   | ( )     |       |          |
| April     | 213.7    | (+77.9) | 14.8           | (+2.54)     | 3.4  | (+0.04) | 19.8  | (-32.80) |
| May       | 205.3    | (+22.1) | 16.3           | (+0.29)     | 5.4  | (-0.67) | 55.8  | (+3.07)  |
| June      | 248.9    | (+72.0) | 21.5           | (+2.56)     | 9.3  | (+0.26) | 38    | (-20.79) |
| July      | 173.6    | (-19.9) | 23.2           | (+1.46)     | 13.3 | (+2.10) | 16.8  | (-28.84) |
| August    | 127.6    | (-56.8) | 20.2           | (-1.36)     | 11.9 | (+0.81) | 151.8 | (+97.30) |
| September | 133.1    | (+1.9)  | 18.3           | (+0.06)     | 9.6  | (+0.29) | 51    | (-7.44)  |
| October   | 101.6    | (-2.2)  | 14.2           | (+0.19)     | 7.3  | (+0.85) | 46.4  | (-18.27) |

Departure from 30-year means (1971-2000) given in brackets.

Data prepared by Tony Scott and provided by Margaret Glendining, Rothamsted Research.



## Yield data (kg)

## Hermes av.yield

|          | Block 1 | Block 2 | Block 3 | Av across blocks | SD       |
|----------|---------|---------|---------|------------------|----------|
| N0 S0    | 1.9     | 2.2     | 2       | 2.033333         | 0.152753 |
| N0 S15   | 1.9     | 1.9     | 2.1     | 1.966667         | 0.11547  |
| N0 S40   | 2.1     | 2.3     | 2.1     | 2.166667         | 0.11547  |
| N100 S0  | 2.5     | 2.7     | 2.9     | 2.7              | 0.2      |
| N100 S15 | 2.5     | 3       | 2.3     | 2.6              | 0.360555 |
| N100 S40 | 2.5     | 2.5     | 3.3     | 2.766667         | 0.46188  |
| N200 S0  | 2.9     | 3       | 2.5     | 2.8              | 0.264575 |
| N200 S15 | 2.7     | 3.2     | 2.7     | 2.866667         | 0.288675 |
| N200 S40 | 2.6     | 2.7     | 2.8     | 2.7              | 0.1      |

## Rosetta av.yield

|          | Block 1 | Block 2 | Block 3 | Av across blocks | SD       |
|----------|---------|---------|---------|------------------|----------|
| N0 S0    | 1.9     | 2.2     | 1.8     | 1.966667         | 0.208167 |
| N0 S15   | 2       | 2.4     | 2       | 2.133333         | 0.23094  |
| N0 S40   | 2.1     | 2.3     | 1.4     | 1.933333         | 0.472582 |
| N100 S0  | 2.3     | 2.1     | 2.1     | 2.166667         | 0.11547  |
| N100 S15 | 2.4     | 2.6     | 2.5     | 2.5              | 0.1      |
| N100 S40 | 2.3     | 2.6     | 2.1     | 2.333333         | 0.251661 |
| N200 S0  | 2.6     | 3.1     | 2.7     | 2.8              | 0.264575 |
| N200 S15 | 2.1     | 3.2     | 2.8     | 2.7              | 0.556776 |
| N200 S40 | 1.9     | 2.9     | 3       | 2.6              | 0.608276 |

## Saturna av.yield

|          | Block 1 | Block 2 | Block 3 | Av across blocks | SD       |
|----------|---------|---------|---------|------------------|----------|
| N0 S0    | 2.1     | 2       | 1.6     | 1.9              | 0.264575 |
| N0 S15   | 1.7     | 2.4     | 1.9     | 2                | 0.360555 |
| N0 S40   | 2       | 2.4     | 1.3     | 1.9              | 0.556776 |
| N100 S0  | 2.4     | 2.6     | 1.9     | 2.3              | 0.360555 |
| N100 S15 | 2.4     | 2.4     | 2.1     | 2.3              | 0.173205 |
| N100 S40 | 2.2     | 2.7     | 1.7     | 2.2              | 0.5      |
| N200 S0  | 2.7     | 2.5     | 2.6     | 2.6              | 0.1      |
| N200 S15 | 2.9     | 2.5     | 1.8     | 2.4              | 0.556776 |
| N200 S40 | 2.5     | 2.9     | 2.3     | 2.566667         | 0.305505 |

## P.Dell av.yield

|          | Block 1 | Block 2 | Block 3 | Av across blocks | SD       |
|----------|---------|---------|---------|------------------|----------|
| N0 S0    | 2.3     | 2.2     | 1.7     | 2.066667         | 0.321455 |
| N0 S15   | 2.5     | 2.9     | 1.6     | 2.333333         | 0.665833 |
| N0 S40   | 2.5     | 2.7     | 1.7     | 2.3              | 0.52915  |
| N100 S0  | 2.7     | 2.6     | 2.2     | 2.5              | 0.264575 |
| N100 S15 | 2.7     | 2.4     | 2.4     | 2.5              | 0.173205 |
| N100 S40 | 2.6     | 2.7     | 2.1     | 2.466667         | 0.321455 |
| N200 S0  | 3       | 3.1     | 2       | 2.7              | 0.608276 |
| N200 S15 | 2.7     | 3.4     | 2.6     | 2.9              | 0.43589  |
| N200 S40 | 3.5     | 2.7     | 2.7     | 2.966667         | 0.46188  |

## Verdi av.yield

|          | Block 1 | Block 2 | Block 3 | Av across blocks | SD       |
|----------|---------|---------|---------|------------------|----------|
| N0 S0    | 2.4     | 2.2     | 1.4     | 2                | 0.52915  |
| N0 S15   | 1.8     | 2.9     | 1.2     | 1.966667         | 0.862168 |
| N0 S40   | 2.1     | 2.2     | 1.7     | 2                | 0.264575 |
| N100 S0  | 3.1     | 3       | 2.5     | 2.866667         | 0.321455 |
| N100 S15 | 2.5     | 2.7     | 2.2     | 2.466667         | 0.251661 |
| N100 S40 | 2.2     | 3.1     | 1.9     | 2.4              | 0.6245   |
| N200 S0  | 3.3     | 3.4     | 2.5     | 3.066667         | 0.493288 |
| N200 S15 | 2.9     | 3.6     | 3.3     | 3.266667         | 0.351188 |
| N200 S40 | 3.4     | 3.3     | 2       | 2.9              | 0.781025 |

Russet Burbank av.yield

|          | Block 1 | Block 2 | Block 3 | Av across blocks | SD       |
|----------|---------|---------|---------|------------------|----------|
| N0 S0    | 2.22    | 2.1     | 2.6     | 2.306667         | 0.261024 |
| N0 S15   | 2.5     | 2.8     | 2.2     | 2.5              | 0.3      |
| N0 S40   | 2.1     | 2.3     | 2.3     | 2.233333         | 0.11547  |
| N100 S0  | 2.7     | 2.7     | 2.7     | 2.7              | 5.44E-16 |
| N100 S15 | 2.2     | 3.1     | 2.4     | 2.566667         | 0.472582 |
| N100 S40 | 2.6     | 2.1     | 2.7     | 2.466667         | 0.321455 |
| N200 S0  | 2.9     | 2.4     | 2.5     | 2.6              | 0.264575 |
| N200 S15 | 2.7     | 3.1     | 2.1     | 2.633333         | 0.503322 |
| N200 S40 | 2.7     | 2.8     | 2.9     | 2.8              | 0.1      |

King Edwards av.yield

|          | Block 1 | Block 2 | Block 3 | Av across blocks | SD       |
|----------|---------|---------|---------|------------------|----------|
| N0 S0    | 2.2     | 2.1     | 1.6     | 1.966667         | 0.321455 |
| N0 S15   | 1.9     | 1.8     | 2.1     | 1.933333         | 0.152753 |
| N0 S40   | 1.8     | 2.3     | 1.7     | 1.933333         | 0.321455 |
| N100 S0  | 3.1     | 3.1     | 2.8     | 3                | 0.173205 |
| N100 S15 | 2.8     | 2.3     | 2.3     | 2.466667         | 0.288675 |
| N100 S40 | 3       | 2.9     | 2.3     | 2.733333         | 0.378594 |
| N200 S0  | 3.1     | 2.9     | 2.1     | 2.7              | 0.52915  |
| N200 S15 | 3.2     | 3.9     | 3       | 3.366667         | 0.472582 |
| N200 S40 | 3.5     | 3       | 2.8     | 3.1              | 0.360555 |

Umatilla av. Yield

|          | Block 1 | Block 2 | Block 3 | Av across blocks | SD       |
|----------|---------|---------|---------|------------------|----------|
| N0 S0    | 2       | 2.1     | 2       | 2.033333         | 0.057735 |
| N0 S15   | 2.3     | 1.8     | 1.9     | 2                | 0.264575 |
| N0 S40   | 2.2     | 2.5     | 1.9     | 2.2              | 0.3      |
| N100 S0  | 3.1     | 2.8     | 2.4     | 2.766667         | 0.351188 |
| N100 S15 | 2.5     | 3.2     | 2.8     | 2.833333         | 0.351188 |
| N100 S40 | 2.5     | 2.7     | 2.6     | 2.6              | 0.1      |
| N200 S0  | 2.8     | 2.7     | 2.6     | 2.7              | 0.1      |
| N200 S15 | 2.8     | 3.5     | 3       | 3.1              | 0.360555 |
| N200 S40 | 2.7     | 3       | 2.5     | 2.733333         | 0.251661 |

Maris Piper av.yield

|       | Block 1 | Block 2 | Block 3 | Av across blocks | SD       |
|-------|---------|---------|---------|------------------|----------|
| N0 S0 | 2.46    | 2.63    | 2.39    | 2.493333         | 0.123423 |

|          |      |      |      |          |          |
|----------|------|------|------|----------|----------|
| N0 S15   | 2.62 | 3.2  | 2.04 | 2.62     | 0.58     |
| N0 S40   | 3    | 2.12 | 2.9  | 2.673333 | 0.481802 |
| N100 S0  | 3.3  | 3.1  | 2.7  | 3.033333 | 0.305505 |
| N100 S15 | 3.1  | 3.1  | 4.2  | 3.466667 | 0.635085 |
| N100 S40 | 2.8  | 3    | 2.8  | 2.866667 | 0.11547  |
| N200 S0  | 3.9  | 3    | 3.6  | 3.5      | 0.458258 |
| N200 S15 | 3.5  | 4.2  | 3.7  | 3.8      | 0.360555 |
| N200 S40 | 3.3  | 3.7  | 3.1  | 3.366667 | 0.305505 |

Markies av. Yield

|          | Block 1 | Block 2 | Block 3 | Av across blocks | SD       |
|----------|---------|---------|---------|------------------|----------|
| N0 S0    | 2.23    | 2.5     | 2.24    | 2.323333         | 0.15308  |
| N0 S15   | 2.5     | 2.6     | 2       | 2.366667         | 0.321455 |
| N0 S40   | 2.3     | 1.9     | 2.2     | 2.133333         | 0.208167 |
| N100 S0  | 3       | 3.1     | 2.6     | 2.9              | 0.264575 |
| N100 S15 | 2.8     | 3.6     | 3       | 3.133333         | 0.416333 |
| N100 S40 | 2.9     | 3.5     | 2.9     | 3.1              | 0.34641  |
| N200 S0  | 3.3     | 3       | 3.3     | 3.2              | 0.173205 |
| N200 S15 | 3.1     | 3.3     | 3.1     | 3.166667         | 0.11547  |
| N200 S40 | 4.3     | 3.7     | 3       | 3.666667         | 0.650641 |

Lady Claire av. Yield

|          | Block 1 | Block 2 | Block 3 | Av across blocks | SD       |
|----------|---------|---------|---------|------------------|----------|
| N0 S0    | 1.4     | 1.5     | 1.3     | 1.4              | 0.1      |
| N0 S15   | 1.5     | 1.5     | 1.2     | 1.4              | 0.173205 |
| N0 S40   |         | 1.7     | 1.6     | 1.65             | 0.070711 |
| N100 S0  | 2.6     | 2       | 1.6     | 2.066667         | 0.503322 |
| N100 S15 | 1.6     | 1.7     | 1.8     | 1.7              | 0.1      |
| N100 S40 | 1.8     | 1.7     | 2       | 1.833333         | 0.152753 |
| N200 S0  | 2.5     | 2       | 2.2     | 2.233333         | 0.251661 |
| N200 S15 | 2.1     | 2.1     | 2.3     | 2.166667         | 0.11547  |
| N200 S40 | 2.5     | 2.4     | 1.7     | 2.2              | 0.43589  |

Daisy av. Yield

|          | Block 1 | Block 2 | Block 3 | Av across blocks | SD       |
|----------|---------|---------|---------|------------------|----------|
| N0 S0    | 2       | 1.6     | 1.5     | 1.7              | 0.264575 |
| N0 S15   | 1.9     | 1.9     | 1.8     | 1.866667         | 0.057735 |
| N0 S40   | 1.8     | 1.9     | 1.7     | 1.8              | 0.1      |
| N100 S0  | 2.8     | 2.8     | 1.8     | 2.466667         | 0.57735  |
| N100 S15 | 2.3     | 1.5     | 1.9     | 1.9              | 0.4      |
| N100 S40 | 2.4     | 2.5     | 2.4     | 2.433333         | 0.057735 |
| N200 S0  | 2.5     | 2.6     | 1.6     | 2.233333         | 0.550757 |
| N200 S15 | 1.6     | 2.3     | 2.4     | 2.1              | 0.43589  |
| N200 S40 | 2.4     | 3.2     | 1.2     | 2.266667         | 1.006645 |

Harmony av. Yield

|        | Block 1 | Block 2 | Block 3 | Av across blocks | SD       |
|--------|---------|---------|---------|------------------|----------|
| N0 S0  | 2.7     | 3       | 2.2     | 2.633333         | 0.404145 |
| N0 S15 | 2.4     | 2.4     | 1.8     | 2.2              | 0.34641  |
| N0 S40 | 2.8     | 2.4     | 2       | 2.4              | 0.4      |

|          |     |     |     |          |          |
|----------|-----|-----|-----|----------|----------|
| N100 S0  | 2.7 | 2.7 | 3   | 2.8      | 0.173205 |
| N100 S15 | 3.2 | 3.3 | 3.2 | 3.233333 | 0.057735 |
| N100 S40 | 2.6 | 3.4 | 2.9 | 2.966667 | 0.404145 |
| N200 S0  | 3   | 3   | 2.8 | 2.933333 | 0.11547  |
| N200 S15 | 2.9 | 3.3 | 2.8 | 3        | 0.264575 |
| N200 S40 | 4   | 3   | 3.4 | 3.466667 | 0.503322 |



Analytical results

| variety     | Rep | Treatment (kg/Ha) | % Moisture | % Solids | Fructose (g/kg DW) | Glucose (g/kg DW) | Sucrose (g/kg DW) |
|-------------|-----|-------------------|------------|----------|--------------------|-------------------|-------------------|
| Lady Claire | 1   | N0 : S0           | 77.94%     | 22.06%   | 0.06               | 0.16              | 5.81              |
| Lady Claire | 1   | N0 : S15          | 77.30%     | 22.70%   | 0.03               | 0.09              | 2.77              |
| Lady Claire | 1   | N0 : S40          | *          | *        | *                  | *                 | *                 |
| Lady Claire | 1   | N100 : S0         | 80.04%     | 19.96%   | 0.04               | 0.10              | 3.94              |
| Lady Claire | 1   | N100 : S15        | 78.69%     | 21.31%   | 0.05               | 0.14              | 6.54              |
| Lady Claire | 1   | N100 : S40        | 79.57%     | 20.43%   | 0.05               | 0.11              | 5.87              |
| Lady Claire | 1   | N200 : S0         | 79.05%     | 20.95%   | 0.06               | 0.18              | 6.04              |
| Lady Claire | 1   | N200 : S15        | 80.59%     | 19.41%   | 0.06               | 0.20              | 6.61              |
| Lady Claire | 1   | N200 : S40        | 79.19%     | 20.81%   | 0.05               | 0.14              | 6.14              |
| Lady Claire | 2   | N0 : S0           | 78.83%     | 21.17%   | 0.12               | 0.35              | 10.64             |
| Lady Claire | 2   | N0 : S15          | 77.90%     | 22.10%   | 0.05               | 0.18              | 6.34              |
| Lady Claire | 2   | N0 : S40          | 78.86%     | 21.14%   | 0.04               | 0.12              | 5.33              |
| Lady Claire | 2   | N100 : S0         | 79.29%     | 20.71%   | 0.09               | 0.20              | 6.99              |
| Lady Claire | 2   | N100 : S15        | 78.27%     | 21.73%   | 0.03               | 0.08              | 4.43              |
| Lady Claire | 2   | N100 : S40        | 81.43%     | 18.57%   | 0.05               | 0.12              | 4.80              |
| Lady Claire | 2   | N200 : S0         | 79.55%     | 20.45%   | 0.05               | 0.13              | 6.10              |
| Lady Claire | 2   | N200 : S15        | 80.25%     | 19.75%   | 0.06               | 0.18              | 6.18              |
| Lady Claire | 2   | N200 : S40        | 79.46%     | 20.54%   | 0.03               | 0.12              | 6.12              |
| Lady Claire | 3   | N0 : S0           | 78.19%     | 21.81%   | 0.05               | 0.15              | 5.84              |
| Lady Claire | 3   | N0 : S15          | 77.27%     | 22.73%   | 0.09               | 0.21              | 7.02              |
| Lady Claire | 3   | N0 : S40          | 78.04%     | 21.96%   | 0.10               | 0.19              | 7.10              |
| Lady Claire | 3   | N100 : S0         | 79.44%     | 20.56%   | 0.10               | 0.21              | 9.03              |
| Lady Claire | 3   | N100 : S15        | 79.65%     | 20.35%   | 0.19               | 0.29              | 6.33              |
| Lady Claire | 3   | N100 : S40        | 79.15%     | 20.85%   | 0.06               | 0.14              | 6.36              |
| Lady Claire | 3   | N200 : S0         | 78.82%     | 21.18%   | 0.06               | 0.14              | 4.07              |
| Lady Claire | 3   | N200 : S15        | 79.88%     | 20.12%   | 0.03               | 0.11              | 4.91              |
| Lady Claire | 3   | N200 : S40        | 77.28%     | 22.72%   | 0.03               | 0.10              | 4.41              |
| Daisy       | 1   | N0 : S0           | 76.12%     | 23.88%   | 0.08               | 0.21              | 7.16              |
| Daisy       | 1   | N0 : S15          | 77.85%     | 22.15%   | 0.19               | 0.56              | 7.49              |
| Daisy       | 1   | N0 : S40          | *          | *        | *                  | *                 | *                 |
| Daisy       | 1   | N100 : S0         | 77.16%     | 22.84%   | 0.16               | 0.45              | 5.68              |
| Daisy       | 1   | N100 : S15        | 77.12%     | 22.88%   | 0.09               | 0.26              | 7.97              |
| Daisy       | 1   | N100 : S40        | 76.35%     | 23.65%   | 0.28               | 0.72              | 11.70             |
| Daisy       | 1   | N200 : S0         | 76.85%     | 23.15%   | 0.74               | 1.17              | 8.81              |
| Daisy       | 1   | N200 : S15        | 77.81%     | 22.19%   | 0.09               | 0.24              | 9.08              |
| Daisy       | 1   | N200 : S40        | 76.94%     | 23.06%   | 0.26               | 0.71              | 5.80              |
| Daisy       | 2   | N0 : S0           | 76.88%     | 23.12%   | 0.10               | 0.30              | 8.44              |
| Daisy       | 2   | N0 : S15          | 77.89%     | 22.11%   | 0.36               | 0.48              | 8.13              |
| Daisy       | 2   | N0 : S40          | 76.88%     | 23.12%   | 0.29               | 0.44              | 9.51              |
| Daisy       | 2   | N100 : S0         | 75.54%     | 24.46%   | 0.24               | 0.27              | 6.29              |
| Daisy       | 2   | N100 : S15        | 78.89%     | 21.11%   | 0.14               | 0.18              | 6.37              |
| Daisy       | 2   | N100 : S40        | 77.14%     | 22.86%   | 0.37               | 0.53              | 10.36             |
| Daisy       | 2   | N200 : S0         | 76.58%     | 23.42%   | 0.23               | 0.39              | 8.70              |
| Daisy       | 2   | N200 : S15        | 77.36%     | 22.64%   | 0.25               | 0.32              | 8.67              |
| Daisy       | 2   | N200 : S40        | 75.69%     | 24.31%   | 0.34               | 0.47              | 8.16              |

|          |   |            |        |        |      |       |       |
|----------|---|------------|--------|--------|------|-------|-------|
| Daisy    | 3 | N0 : S0    | 78.13% | 21.87% | 0.64 | 1.00  | 8.50  |
| Daisy    | 3 | N0 : S15   | 76.78% | 23.22% | 0.39 | 0.51  | 8.06  |
| Daisy    | 3 | N0 : S40   | 78.55% | 21.45% | 0.32 | 0.39  | 7.47  |
| Daisy    | 3 | N100 : S0  | 77.16% | 22.84% | 1.08 | 1.53  | 16.18 |
| Daisy    | 3 | N100 : S15 | 77.71% | 22.29% | 0.73 | 0.94  | 8.68  |
| Daisy    | 3 | N100 : S40 | 78.10% | 21.90% | 0.35 | 0.65  | 11.26 |
| Daisy    | 3 | N200 : S0  | 79.08% | 20.92% | 0.69 | 1.05  | 9.10  |
| Daisy    | 3 | N200 : S15 | 74.79% | 25.21% | 0.26 | 0.43  | 7.69  |
| Daisy    | 3 | N200 : S40 | 79.16% | 20.84% | 0.65 | 0.81  | 8.57  |
| Harmony  | 1 | N0 : S0    | 82.54% | 17.46% | 0.10 | 0.03  | 0.92  |
| Harmony  | 1 | N0 : S15   | 81.14% | 18.86% | 0.06 | 0.02  | 0.25  |
| Harmony  | 1 | N0 : S40   | 82.20% | 17.80% | 0.15 | 0.07  | 0.22  |
| Harmony  | 1 | N100 : S0  | 82.14% | 17.86% | 0.10 | 11.33 | 0.14  |
| Harmony  | 1 | N100 : S15 | 79.84% | 20.16% | 0.06 | 7.83  | 0.09  |
| Harmony  | 1 | N100 : S40 | 81.27% | 18.73% | 0.26 | 1.11  | 0.29  |
| Harmony  | 1 | N200 : S0  | 82.39% | 17.61% | 0.23 | 16.54 | 0.11  |
| Harmony  | 1 | N200 : S15 | 81.80% | 18.20% | 0.18 | 0.08  | 0.36  |
| Harmony  | 1 | N200 : S40 | 81.53% | 18.47% | 0.11 | 0.11  | 0.50  |
| Harmony  | 2 | N0 : S0    | 81.23% | 18.77% | 0.90 | 21.98 | 10.75 |
| Harmony  | 2 | N0 : S15   | 82.33% | 17.67% | 0.99 | 19.61 | 7.98  |
| Harmony  | 2 | N0 : S40   | 81.96% | 18.04% | 1.07 | 30.12 | 9.37  |
| Harmony  | 2 | N100 : S0  | 82.73% | 17.27% | 1.55 | 27.80 | 13.96 |
| Harmony  | 2 | N100 : S15 | 82.46% | 17.54% | 0.97 | 32.06 | 13.96 |
| Harmony  | 2 | N100 : S40 | 83.73% | 16.27% | 1.59 | 25.37 | 13.74 |
| Harmony  | 2 | N200 : S0  | 83.71% | 16.29% | 0.15 | 28.51 | 13.35 |
| Harmony  | 2 | N200 : S15 | 81.53% | 18.47% | 0.32 | 2.77  | 16.54 |
| Harmony  | 2 | N200 : S40 | 78.72% | 21.28% | 0.16 | 20.90 | 13.82 |
| Harmony  | 3 | N0 : S0    | 81.40% | 18.60% | 0.54 | 24.89 | 11.37 |
| Harmony  | 3 | N0 : S15   | 83.12% | 16.88% | 0.39 | 23.58 | 9.40  |
| Harmony  | 3 | N0 : S40   | 81.91% | 18.09% | 0.60 | 16.20 | 8.50  |
| Harmony  | 3 | N100 : S0  | 82.22% | 17.78% | 0.07 | 21.65 | 13.60 |
| Harmony  | 3 | N100 : S15 | 83.07% | 16.93% | 0.73 | 32.53 | 17.25 |
| Harmony  | 3 | N100 : S40 | 83.08% | 16.92% | 0.46 | 20.25 | 8.17  |
| Harmony  | 3 | N200 : S0  | 80.98% | 19.02% | 0.58 | 26.18 | 13.22 |
| Harmony  | 3 | N200 : S15 | 84.65% | 15.35% | 0.22 | 30.62 | 12.81 |
| Harmony  | 3 | N200 : S40 | 82.83% | 17.17% | 0.46 | 25.82 | 13.32 |
| Umatilla | 1 | N0 : S0    | 78.72% | 21.28% | 0.25 | 14.74 | 9.31  |
| Umatilla | 1 | N0 : S15   | 77.05% | 22.95% | 0.47 | 1.01  | 6.30  |
| Umatilla | 1 | N0 : S40   | 78.06% | 21.94% | 0.85 | 1.77  | 8.61  |
| Umatilla | 1 | N100 : S0  | 80.51% | 19.49% | 0.95 | 1.71  | 8.99  |
| Umatilla | 1 | N100 : S15 | 78.55% | 21.45% | 0.61 | 1.19  | 6.64  |
| Umatilla | 1 | N100 : S40 | 79.39% | 20.61% | 0.63 | 2.29  | 10.46 |
| Umatilla | 1 | N200 : S0  | 80.38% | 19.62% | 0.33 | 0.91  | 8.42  |
| Umatilla | 1 | N200 : S15 | 77.74% | 22.26% | 0.50 | 1.36  | 7.18  |
| Umatilla | 1 | N200 : S40 | 79.54% | 20.46% | 0.20 | 0.63  | 9.37  |
| Umatilla | 2 | N0 : S0    | 78.77% | 21.23% | 0.36 | 0.95  | 11.40 |
| Umatilla | 2 | N0 : S15   | 78.35% | 21.65% | 0.54 | 1.03  | 6.20  |
| Umatilla | 2 | N0 : S40   | 80.03% | 19.97% | 0.04 | 1.10  | 9.01  |
| Umatilla | 2 | N100 : S0  | 78.43% | 21.57% | 0.09 | 2.09  | 8.72  |
| Umatilla | 2 | N100 : S15 | 75.99% | 24.01% | 0.09 | 2.20  | 11.18 |
| Umatilla | 2 | N100 : S40 | 79.02% | 20.98% | 0.05 | 0.06  | 0.39  |
| Umatilla | 2 | N200 : S0  | 78.16% | 21.84% | 0.10 | 3.17  | 10.70 |

|              |   |            |        |        |      |      |       |
|--------------|---|------------|--------|--------|------|------|-------|
| Umatilla     | 2 | N200 : S15 | 80.00% | 20.00% | 1.54 | 1.88 | 11.40 |
| Umatilla     | 2 | N200 : S40 | 78.69% | 21.31% | 0.26 | 0.61 | 8.65  |
| Umatilla     | 3 | N0 : S15   | 78.48% | 21.52% | 0.21 | 2.47 | 12.07 |
| Umatilla     | 3 | N0 : S40   | 78.66% | 21.34% | 0.03 | 2.88 | 15.63 |
| Umatilla     | 3 | N100 : S0  | 76.65% | 23.35% | 0.10 | 2.61 | 13.52 |
| Umatilla     | 3 | N100 : S15 | 79.19% | 20.81% | 0.04 | 2.78 | 9.87  |
| Umatilla     | 3 | N100 : S40 | 77.56% | 22.44% | 0.12 | 1.31 | 11.94 |
| Umatilla     | 3 | N200 : S0  | 77.88% | 22.12% | 0.07 | 2.91 | 14.41 |
| Umatilla     | 3 | N200 : S15 | 76.85% | 23.15% | 0.22 | 2.63 | 15.22 |
| Umatilla     | 3 | N200 : S40 | 78.94% | 21.06% | 0.35 | 2.16 | 12.54 |
| Umatilla     | 3 | N0 : S0    | 79.28% | 20.72% | 0.13 | 1.37 | 10.26 |
| Lady Rosetta | 1 | N0 : S0    | 74.75% | 25.25% | 0.08 | 0.01 | 3.19  |
| Lady Rosetta | 1 | N0 : S15   | 72.69% | 27.31% | 0.06 | 0.05 | 3.65  |
| Lady Rosetta | 1 | N0 : S40   | 74.16% | 25.84% | 0.10 | 0.13 | 3.07  |
| Lady Rosetta | 1 | N100 : S0  | 75.36% | 24.64% | 0.13 | 0.18 | 5.36  |
| Lady Rosetta | 1 | N100 : S15 | 75.39% | 24.61% | 0.10 | 0.02 | 2.65  |
| Lady Rosetta | 1 | N100 : S40 | 74.98% | 25.02% | 0.20 | 0.28 | 6.41  |
| Lady Rosetta | 1 | N200 : S0  | 74.42% | 25.58% | 0.15 | 0.09 | 4.26  |
| Lady Rosetta | 1 | N200 : S15 | 73.62% | 26.38% | 0.26 | 0.23 | 6.28  |
| Lady Rosetta | 1 | N200 : S40 | 71.76% | 28.24% | 0.17 | 0.20 | 5.58  |
| Lady Rosetta | 2 | N0 : S0    | 75.22% | 24.78% | 0.08 | 0.14 | 3.06  |
| Lady Rosetta | 2 | N0 : S15   | 76.12% | 23.88% | 0.13 | 0.19 | 5.21  |
| Lady Rosetta | 2 | N0 : S40   | 75.19% | 24.81% | 0.16 | 0.14 | 4.76  |
| Lady Rosetta | 2 | N100 : S40 | 75.33% | 24.67% | 0.10 | 0.10 | 3.85  |
| Lady Rosetta | 2 | N200 : S0  | 73.69% | 26.31% | 0.22 | 0.18 | 4.73  |
| Lady Rosetta | 2 | N200 : S15 | 73.96% | 26.04% | 0.11 | 0.18 | 4.63  |
| Lady Rosetta | 2 | N200 : S40 | 74.35% | 25.65% | 0.26 | 0.18 | 6.54  |
| Lady Rosetta | 3 | N0 : S0    | 73.22% | 26.78% | 0.21 | 0.11 | 5.63  |
| Lady Rosetta | 3 | N0 : S15   | 74.73% | 25.27% | 0.19 | 0.22 | 4.28  |
| Lady Rosetta | 3 | N0 : S40   | 74.70% | 25.30% | 0.12 | 0.04 | 4.59  |
| Lady Rosetta | 3 | N100 : S0  | 75.91% | 24.09% | 0.20 | 0.01 | 4.79  |
| Lady Rosetta | 3 | N100 : S15 | 74.67% | 25.33% | 0.10 | 0.01 | 4.42  |
| Lady Rosetta | 3 | N100 : S40 | 74.47% | 25.53% | 0.10 | 0.25 | 4.23  |
| Lady Rosetta | 3 | N200 : S0  | 73.76% | 26.24% | 0.06 | 0.00 | 4.37  |
| Lady Rosetta | 3 | N200 : S15 | 72.49% | 27.51% | 0.27 | 0.20 | 5.57  |
| Lady Rosetta | 3 | N200 : S40 | 74.35% | 25.65% | 0.06 | 0.00 | 4.48  |
| Lady Rosetta | 2 | N100 : S0  | 75.47% | 24.53% | 0.10 | 0.02 | 0.89  |
| Lady Rosetta | 2 | N100 : S15 | 75.04% | 24.96% | 0.09 | 0.01 | 5.60  |
| Saturna      | 1 | N0 : S0    | 76.22% | 23.78% | 0.09 | 0.02 | 1.19  |
| Saturna      | 1 | N0 : S15   | 76.14% | 23.86% | 0.22 | 0.00 | 3.90  |
| Saturna      | 1 | N0 : S40   | 77.76% | 22.24% | 0.12 | 0.03 | 2.60  |
| Saturna      | 1 | N100 : S0  | 74.91% | 25.09% | 0.14 | 0.15 | 6.04  |
| Saturna      | 1 | N100 : S15 | 74.76% | 25.24% | 0.11 | 0.02 | 2.11  |
| Saturna      | 1 | N100 : S40 | 76.16% | 23.84% | 0.08 | 0.23 | 5.55  |
| Saturna      | 1 | N200 : S0  | 76.06% | 23.94% | 0.19 | 0.03 | 0.14  |
| Saturna      | 1 | N200 : S15 | 75.46% | 24.54% | 0.12 | 0.19 | 5.82  |
| Saturna      | 1 | N200 : S40 | 75.37% | 24.63% | 0.11 | 0.12 | 5.40  |
| Saturna      | 2 | N0 : S0    | 75.18% | 24.82% | 0.22 | 0.31 | 4.92  |
| Saturna      | 2 | N0 : S15   | 75.55% | 24.45% | 0.12 | 0.10 | 5.36  |
| Saturna      | 2 | N0 : S40   | 77.24% | 22.76% | 0.10 | 0.03 | 3.43  |
| Saturna      | 2 | N100 : S0  | 77.28% | 22.72% | 0.10 | 0.06 | 5.19  |
| Saturna      | 2 | N100 : S15 | 78.28% | 21.72% | 0.11 | 0.03 | 1.32  |

|         |   |            |        |        |      |      |      |
|---------|---|------------|--------|--------|------|------|------|
| Saturna | 2 | N100 : S40 | 77.24% | 22.76% | 0.19 | 0.28 | 6.01 |
| Saturna | 2 | N200 : S0  | 77.01% | 22.99% | 0.10 | 0.02 | 0.09 |
| Saturna | 2 | N200 : S15 | 76.77% | 23.23% | 0.14 | 0.04 | 5.20 |
| Saturna | 2 | N200 : S40 | 75.94% | 24.06% | 0.16 | 0.24 | 7.67 |
| Saturna | 3 | N0 : S0    | 75.88% | 24.12% | 0.21 | 0.32 | 7.53 |
| Saturna | 3 | N0 : S15   | 77.43% | 22.57% | 5.01 | 0.22 | 0.40 |
| Saturna | 3 | N0 : S40   | 77.83% | 22.17% | 0.22 | 0.30 | 7.79 |
| Saturna | 3 | N100 : S0  | 77.32% | 22.68% | 0.16 | 0.14 | 7.52 |
| Saturna | 3 | N100 : S15 | 77.50% | 22.50% | 0.44 | 0.54 | 7.28 |
| Saturna | 3 | N100 : S40 | 78.18% | 21.82% | 0.58 | 0.68 | 7.24 |
| Saturna | 3 | N200 : S0  | 80.51% | 19.49% | 0.43 | 0.61 | 9.51 |
| Saturna | 3 | N200 : S15 | 77.59% | 22.41% | 4.56 | 0.18 | 0.32 |
| Saturna | 3 | N200 : S40 | 76.63% | 23.37% | 0.29 | 0.30 | 7.24 |
| Hermes  | 1 | N0 : S0    | 74.49% | 25.51% | 0.21 | 0.20 | 8.43 |
| Hermes  | 1 | N0 : S15   | 75.16% | 24.84% | 0.11 | 0.02 | 0.04 |
| Hermes  | 1 | N0 : S40   | 76.15% | 23.85% | 0.14 | 0.13 | 7.91 |
| Hermes  | 1 | N100 : S0  | 75.21% | 24.79% | 0.13 | 0.02 | 2.46 |
| Hermes  | 1 | N100 : S15 | 74.60% | 25.40% | 0.10 | 0.17 | 8.63 |
| Hermes  | 1 | N100 : S40 | 74.89% | 25.11% | 0.24 | 0.02 | 3.19 |
| Hermes  | 1 | N200 : S0  | 75.03% | 24.97% | 0.16 | 0.01 | 1.91 |
| Hermes  | 1 | N200 : S15 | 76.88% | 23.12% | 0.22 | 0.43 | 7.97 |
| Hermes  | 1 | N200 : S40 | 77.02% | 22.98% | 0.17 | 0.28 | 8.15 |
| Hermes  | 2 | N0 : S0    | 76.20% | 23.80% | 0.07 | 0.01 | 3.28 |
| Hermes  | 2 | N0 : S15   | 76.23% | 23.77% | 0.19 | 0.22 | 7.77 |
| Hermes  | 2 | N0 : S40   | 76.14% | 23.86% | 0.12 | 0.03 | 4.22 |
| Hermes  | 2 | N100 : S0  | 75.62% | 24.38% | 0.26 | 0.44 | 4.98 |
| Hermes  | 2 | N100 : S15 | 76.98% | 23.02% | 0.21 | 0.03 | 1.86 |
| Hermes  | 2 | N100 : S40 | 76.85% | 23.15% | 0.19 | 0.28 | 6.71 |
| Hermes  | 2 | N200 : S0  | 76.44% | 23.56% | 0.16 | 0.02 | 0.75 |
| Hermes  | 2 | N200 : S15 | 77.47% | 22.53% | 0.37 | 1.36 | 7.97 |
| Hermes  | 2 | N200 : S40 | 76.28% | 23.72% | 0.17 | 0.03 | 3.97 |
| Hermes  | 3 | N0 : S0    | 74.29% | 25.71% | 0.12 | 0.21 | 8.10 |
| Hermes  | 3 | N0 : S15   | 76.19% | 23.81% | 0.37 | 0.10 | 7.34 |
| Hermes  | 3 | N0 : S40   | 75.14% | 24.86% | 0.44 | 0.02 | 5.27 |
| Hermes  | 3 | N100 : S0  | 74.43% | 25.57% | 0.08 | 0.24 | 7.95 |
| Hermes  | 3 | N100 : S15 | 75.41% | 24.59% | 0.12 | 0.30 | 7.93 |
| Hermes  | 3 | N100 : S40 | 76.66% | 23.34% | 0.11 | 0.04 | 6.15 |
| Hermes  | 3 | N200 : S0  | 77.36% | 22.64% | 0.15 | 0.33 | 9.46 |
| Hermes  | 3 | N200 : S15 | 74.90% | 25.10% | 0.13 | 0.04 | 3.45 |
| Hermes  | 3 | N200 : S40 | 76.70% | 23.30% | 0.35 | 0.39 | 8.07 |
| Verdi   | 1 | N0 : S0    | 75.16% | 24.84% | 1.35 | 0.91 | 5.03 |
| Verdi   | 1 | N0 : S15   | 74.42% | 25.58% | 0.16 | 0.05 | 4.80 |
| Verdi   | 1 | N0 : S40   | 75.34% | 24.66% | 0.57 | 0.00 | 5.75 |
| Verdi   | 1 | N100 : S0  | 77.16% | 22.84% | 0.68 | 0.00 | 5.73 |
| Verdi   | 1 | N100 : S15 | 74.04% | 25.96% | 0.14 | 0.00 | 3.21 |
| Verdi   | 1 | N100 : S40 | 73.14% | 26.86% | 0.22 | 0.00 | 4.22 |
| Verdi   | 1 | N200 : S0  | 83.05% | 16.95% | 0.14 | 0.07 | 4.75 |
| Verdi   | 1 | N200 : S15 | 73.77% | 26.23% | 1.10 | 0.08 | 2.88 |
| Verdi   | 1 | N200 : S40 | 75.60% | 24.40% | 0.13 | 0.02 | 3.92 |
| Verdi   | 2 | N0 : S0    | 74.58% | 25.42% | 0.12 | 0.01 | 2.64 |
| Verdi   | 2 | N0 : S15   | 74.26% | 25.74% | 0.12 | 0.01 | 7.55 |
| Verdi   | 2 | N0 : S40   | 74.09% | 25.91% | 0.10 | 0.16 | 7.80 |

|                |   |            |        |        |      |      |       |
|----------------|---|------------|--------|--------|------|------|-------|
| Verdi          | 2 | N100 : S0  | 74.70% | 25.30% | 0.45 | 0.01 | 3.13  |
| Verdi          | 2 | N100 : S15 | 74.80% | 25.20% | 0.11 | 0.01 | 3.14  |
| Verdi          | 2 | N100 : S40 | 74.50% | 25.50% | 0.12 | 0.01 | 4.55  |
| Verdi          | 2 | N200 : S0  | 73.94% | 26.06% | 0.32 | 0.03 | 3.30  |
| Verdi          | 2 | N200 : S15 | 76.19% | 23.81% | 1.48 | 0.08 | 4.44  |
| Verdi          | 2 | N200 : S40 | 73.50% | 26.50% | 0.14 | 0.00 | 6.76  |
| Verdi          | 3 | N0 : S0    | 72.32% | 27.68% | 0.19 | 0.21 | 9.76  |
| Verdi          | 3 | N0 : S15   | 75.17% | 24.83% | 0.21 | 0.24 | 9.72  |
| Verdi          | 3 | N0 : S40   | 74.48% | 25.52% | 0.65 | 0.69 | 9.24  |
| Verdi          | 3 | N100 : S0  | 73.78% | 26.22% | 0.39 | 0.28 | 8.97  |
| Verdi          | 3 | N100 : S15 | 73.33% | 26.67% | 0.41 | 0.29 | 8.66  |
| Verdi          | 3 | N100 : S40 | 74.90% | 25.10% | 0.29 | 0.11 | 7.72  |
| Verdi          | 3 | N200 : S0  | 74.41% | 25.59% | 0.67 | 0.79 | 10.90 |
| Verdi          | 3 | N200 : S15 | 74.53% | 25.47% | 0.59 | 0.73 | 9.57  |
| Verdi          | 3 | N200 : S40 | 76.01% | 23.99% | 0.95 | 0.20 | 11.24 |
| Pentland Dell  | 1 | N0 : S0    | 77.41% | 22.59% | 2.33 | 3.55 | 9.04  |
| Pentland Dell  | 1 | N0 : S15   | 78.53% | 21.47% | 1.58 | 1.56 | 4.73  |
| Pentland Dell  | 1 | N0 : S40   | 79.13% | 20.87% | 0.94 | 0.96 | 4.36  |
| Pentland Dell  | 1 | N100 : S0  | 78.19% | 21.81% | 1.25 | 1.06 | 6.11  |
| Pentland Dell  | 1 | N100 : S15 | 79.05% | 20.95% | 1.07 | 1.44 | 6.33  |
| Pentland Dell  | 1 | N100 : S40 | 76.36% | 23.64% | 0.81 | 1.04 | 7.36  |
| Pentland Dell  | 1 | N200 : S0  | 77.70% | 22.30% | 1.70 | 2.07 | 9.04  |
| Pentland Dell  | 1 | N200 : S15 | 79.33% | 20.67% | 0.12 | 0.00 | 5.12  |
| Pentland Dell  | 1 | N200 : S40 | 77.95% | 22.05% | 0.83 | 0.56 | 6.22  |
| Pentland Dell  | 2 | N0 : S0    | 78.16% | 21.84% | 1.42 | 1.94 | 5.33  |
| Pentland Dell  | 2 | N0 : S15   | 80.32% | 19.68% | 1.56 | 2.74 | 6.97  |
| Pentland Dell  | 2 | N0 : S40   | 79.26% | 20.74% | 1.27 | 0.06 | 3.13  |
| Pentland Dell  | 2 | N100 : S0  | 77.48% | 22.52% | 0.91 | 0.03 | 1.37  |
| Pentland Dell  | 2 | N100 : S15 | 78.00% | 22.00% | 1.35 | 0.06 | 2.36  |
| Pentland Dell  | 2 | N100 : S40 | 78.96% | 21.04% | 2.01 | 0.13 | 4.71  |
| Pentland Dell  | 2 | N200 : S0  | 73.87% | 26.13% | 1.75 | 2.36 | 6.75  |
| Pentland Dell  | 2 | N200 : S15 | 77.00% | 23.00% | 1.61 | 2.29 | 7.97  |
| Pentland Dell  | 2 | N200 : S40 | 76.23% | 23.77% | 1.42 | 0.07 | 4.02  |
| Pentland Dell  | 3 | N0 : S0    | 78.12% | 21.88% | 4.09 | 5.59 | 10.04 |
| Pentland Dell  | 3 | N0 : S15   | 78.42% | 21.58% | 2.14 | 3.55 | 9.64  |
| Pentland Dell  | 3 | N0 : S40   | 78.61% | 21.39% | 3.32 | 4.18 | 6.61  |
| Pentland Dell  | 3 | N100 : S0  | 79.28% | 20.72% | 2.32 | 1.00 | 3.88  |
| Pentland Dell  | 3 | N100 : S15 | 77.12% | 22.88% | 0.79 | 0.06 | 4.98  |
| Pentland Dell  | 3 | N100 : S40 | 77.30% | 22.70% | 2.26 | 0.06 | 3.37  |
| Pentland Dell  | 3 | N200 : S0  | 76.94% | 23.06% | 1.56 | 2.33 | 9.49  |
| Pentland Dell  | 3 | N200 : S15 | *      | *      | *    | *    | *     |
| Pentland Dell  | 3 | N200 : S40 | 78.21% | 21.79% | 0.86 | 0.05 | 0.78  |
| Russet Burbank | 1 | N0 : S0    | 78.35% | 21.65% | 2.11 | 3.74 | 7.17  |
| Russet Burbank | 1 | N0 : S15   | 75.95% | 24.05% | 3.25 | 5.17 | 10.06 |
| Russet Burbank | 1 | N0 : S40   | 75.64% | 24.36% | 1.78 | 2.51 | 7.98  |
| Russet Burbank | 1 | N100 : S0  | 77.39% | 22.61% | 1.28 | 1.83 | 8.95  |
| Russet Burbank | 1 | N100 : S15 | 78.97% | 21.03% | 1.99 | 2.60 | 9.05  |
| Russet Burbank | 1 | N100 : S40 | 80.25% | 19.75% | 1.92 | 2.93 | 9.63  |
| Russet Burbank | 1 | N200 : S0  | 78.69% | 21.31% | 0.78 | 1.48 | 8.22  |
| Russet Burbank | 1 | N200 : S15 | 77.57% | 22.43% | 0.90 | 1.44 | 7.34  |
| Russet Burbank | 1 | N200 : S40 | 78.10% | 21.90% | 1.23 | 1.68 | 8.53  |
| Russet Burbank | 2 | N0 : S0    | 79.72% | 20.28% | 0.90 | 1.27 | 9.11  |

|                |   |            |        |        |      |      |       |
|----------------|---|------------|--------|--------|------|------|-------|
| Russet Burbank | 2 | N0 : S15   | 76.06% | 23.94% | 1.13 | 2.01 | 8.54  |
| Russet Burbank | 2 | N0 : S40   | 80.05% | 19.95% | 1.88 | 2.69 | 8.57  |
| Russet Burbank | 2 | N100 : S0  | 76.48% | 23.52% | 1.31 | 2.37 | 9.75  |
| Russet Burbank | 2 | N100 : S15 | 78.61% | 21.39% | 1.18 | 1.86 | 8.84  |
| Russet Burbank | 2 | N100 : S40 | 78.79% | 21.21% | 1.13 | 1.79 | 7.33  |
| Russet Burbank | 2 | N200 : S0  | 78.56% | 21.44% | 2.53 | 3.88 | 9.94  |
| Russet Burbank | 2 | N200 : S15 | 77.22% | 22.78% | 2.01 | 2.90 | 10.75 |
| Russet Burbank | 2 | N200 : S40 | 78.13% | 21.87% | 0.75 | 1.35 | 8.45  |
| Russet Burbank | 3 | N0 : S0    | 76.81% | 23.19% | 4.40 | 6.10 | 9.22  |
| Russet Burbank | 3 | N0 : S15   | 76.02% | 23.98% | 3.45 | 4.82 | 11.57 |
| Russet Burbank | 3 | N0 : S40   | 75.72% | 24.28% | 2.80 | 4.02 | 10.03 |
| Russet Burbank | 3 | N100 : S0  | 79.38% | 20.62% | 0.73 | 1.73 | 7.55  |
| Russet Burbank | 3 | N100 : S15 | 76.10% | 23.90% | 1.43 | 2.32 | 8.97  |
| Russet Burbank | 3 | N100 : S40 | 76.34% | 23.66% | 2.54 | 4.06 | 11.11 |
| Russet Burbank | 3 | N200 : S0  | 75.92% | 24.08% | 2.09 | 3.71 | 10.58 |
| Russet Burbank | 3 | N200 : S15 | 76.79% | 23.21% | 1.22 | 2.50 | 7.85  |
| Russet Burbank | 3 | N200 : S40 | 78.53% | 21.47% | 1.11 | 1.90 | 9.36  |
| King Edward    | 1 | N0 : S0    | 77.58% | 22.42% | 0.21 | 0.39 | 8.28  |
| King Edward    | 1 | N0 : S15   | 79.20% | 20.80% | 0.69 | 1.22 | 10.60 |
| King Edward    | 1 | N0 : S40   | 78.81% | 21.19% | 0.41 | 0.59 | 8.46  |
| King Edward    | 1 | N100 : S0  | 79.59% | 20.41% | 0.64 | 1.45 | 8.76  |
| King Edward    | 1 | N100 : S15 | 78.55% | 21.45% | 0.33 | 0.77 | 10.63 |
| King Edward    | 1 | N100 : S40 | 79.73% | 20.27% | 0.34 | 1.01 | 8.48  |
| King Edward    | 1 | N200 : S0  | 71.86% | 28.14% | 0.20 | 0.37 | 7.72  |
| King Edward    | 1 | N200 : S15 | 78.13% | 21.87% | 0.00 | 0.02 | 0.02  |
| King Edward    | 1 | N200 : S40 | 79.78% | 20.22% | 0.80 | 2.04 | 7.91  |
| King Edward    | 2 | N0 : S0    | 78.15% | 21.85% | 0.29 | 0.62 | 8.51  |
| King Edward    | 2 | N0 : S15   | 79.69% | 20.31% | 0.68 | 1.31 | 12.69 |
| King Edward    | 2 | N0 : S40   | 77.36% | 22.64% | 0.21 | 0.48 | 5.96  |
| King Edward    | 2 | N100 : S0  | 79.83% | 20.17% | 1.60 | 2.23 | 11.94 |
| King Edward    | 2 | N100 : S15 | 79.46% | 20.54% | 0.92 | 1.54 | 9.48  |
| King Edward    | 2 | N100 : S40 | 78.40% | 21.60% | 0.27 | 0.85 | 8.75  |
| King Edward    | 2 | N200 : S0  | 77.60% | 22.40% | 1.03 | 2.49 | 13.47 |
| King Edward    | 2 | N200 : S15 | 77.75% | 22.25% | 0.33 | 0.83 | 9.82  |
| King Edward    | 2 | N200 : S40 | 78.96% | 21.04% | 0.15 | 0.61 | 9.90  |
| King Edward    | 3 | N0 : S0    | 77.75% | 22.25% | 0.87 | 1.26 | 10.98 |
| King Edward    | 3 | N0 : S15   | 79.08% | 20.92% | 2.53 | 4.51 | 13.92 |
| King Edward    | 3 | N0 : S40   | 77.77% | 22.23% | 1.34 | 1.95 | 10.32 |
| King Edward    | 3 | N100 : S0  | 78.14% | 21.86% | 3.31 | 4.87 | 10.10 |
| King Edward    | 3 | N100 : S15 | 78.45% | 21.55% | 1.52 | 2.30 | 11.54 |
| King Edward    | 3 | N100 : S40 | 79.25% | 20.75% | 1.25 | 1.92 | 12.74 |
| King Edward    | 3 | N200 : S0  | 77.98% | 22.02% | 1.30 | 2.30 | 12.50 |
| King Edward    | 3 | N200 : S15 | 78.54% | 21.46% | 0.52 | 2.35 | 10.99 |
| King Edward    | 3 | N200 : S40 | 79.40% | 20.60% | 1.09 | 2.46 | 10.76 |
| Markies        | 1 | N0 : S0    | 74.75% | 25.25% | 0.12 | 0.70 | 9.50  |
| Markies        | 1 | N0 : S15   | 75.43% | 24.57% | 0.33 | 1.28 | 11.39 |
| Markies        | 1 | N0 : S40   | 75.15% | 24.85% | 0.07 | 0.17 | 8.40  |
| Markies        | 1 | N100 : S0  | 75.76% | 24.24% | 0.08 | 0.18 | 9.12  |
| Markies        | 1 | N100 : S15 | 75.70% | 24.30% | 0.11 | 0.22 | 9.01  |
| Markies        | 1 | N100 : S40 | 76.13% | 23.87% | 0.34 | 0.24 | 6.00  |
| Markies        | 1 | N200 : S0  | 73.67% | 26.33% | 0.04 | 0.14 | 8.75  |
| Markies        | 1 | N200 : S15 | 74.71% | 25.29% | 0.21 | 0.37 | 11.04 |

|             |   |            |        |        |      |      |       |
|-------------|---|------------|--------|--------|------|------|-------|
| Markies     | 1 | N200 : S40 | 77.33% | 22.67% | 0.17 | 0.32 | 7.00  |
| Markies     | 2 | N0 : S0    | 76.14% | 23.86% | 0.07 | 0.32 | 9.23  |
| Markies     | 2 | N0 : S15   | 75.67% | 24.33% | 0.06 | 0.15 | 9.89  |
| Markies     | 2 | N0 : S40   | 76.91% | 23.09% | 0.20 | 0.24 | 7.29  |
| Markies     | 2 | N100 : S0  | 76.51% | 23.49% | 0.24 | 0.04 | 4.25  |
| Markies     | 2 | N100 : S15 | 77.33% | 22.67% | 0.08 | 0.15 | 8.62  |
| Markies     | 2 | N100 : S40 | 76.98% | 23.02% | 0.10 | 0.18 | 9.34  |
| Markies     | 2 | N200 : S0  | 75.36% | 24.64% | 0.10 | 1.27 | 10.28 |
| Markies     | 2 | N200 : S15 | 75.24% | 24.76% | 0.11 | 0.47 | 9.03  |
| Markies     | 2 | N200 : S40 | 75.23% | 24.77% | 0.62 | 1.77 | 8.99  |
| Markies     | 3 | N0 : S0    | 74.65% | 25.35% | 0.08 | 0.16 | 8.88  |
| Markies     | 3 | N0 : S15   | 74.77% | 25.23% | 0.39 | 0.55 | 11.46 |
| Markies     | 3 | N0 : S40   | 75.66% | 24.34% | 0.13 | 0.24 | 7.66  |
| Markies     | 3 | N100 : S0  | 75.57% | 24.43% | 0.11 | 0.19 | 7.35  |
| Markies     | 3 | N100 : S15 | 75.52% | 24.48% | 0.49 | 0.82 | 10.47 |
| Markies     | 3 | N100 : S40 | 74.86% | 25.14% | 0.22 | 0.09 | 8.30  |
| Markies     | 3 | N200 : S0  | 76.49% | 23.51% | 0.35 | 1.17 | 12.16 |
| Markies     | 3 | N200 : S15 | 76.15% | 23.85% | 0.16 | 0.90 | 11.43 |
| Markies     | 3 | N200 : S40 | 73.61% | 26.39% | 0.40 | 0.53 | 13.40 |
| Maris Piper | 1 | N0 : S0    | 76.16% | 23.84% | 0.15 | 0.19 | 8.83  |
| Maris Piper | 1 | N0 : S15   | 76.78% | 23.22% | 0.29 | 0.35 | 8.87  |
| Maris Piper | 1 | N0 : S40   | 77.39% | 22.61% | 0.48 | 0.82 | 8.60  |
| Maris Piper | 1 | N100 : S0  | 76.71% | 23.29% | 0.30 | 0.36 | 8.63  |
| Maris Piper | 1 | N100 : S15 | 75.76% | 24.24% | 0.15 | 0.08 | 7.81  |
| Maris Piper | 1 | N100 : S40 | 75.90% | 24.10% | 0.20 | 0.27 | 7.04  |
| Maris Piper | 1 | N200 : S0  | 76.94% | 23.06% | 0.52 | 0.61 | 8.93  |
| Maris Piper | 1 | N200 : S15 | 76.06% | 23.94% | 0.15 | 0.02 | 1.20  |
| Maris Piper | 1 | N200 : S40 | 74.30% | 25.70% | 0.28 | 0.40 | 10.20 |
| Maris Piper | 2 | N0 : S0    | 76.38% | 23.62% | 0.23 | 0.06 | 8.24  |
| Maris Piper | 2 | N0 : S15   | 77.63% | 22.37% | 0.08 | 0.12 | 0.91  |
| Maris Piper | 2 | N0 : S40   | 75.95% | 24.05% | 0.18 | 0.21 | 8.66  |
| Maris Piper | 2 | N100 : S0  | 77.02% | 22.98% | 0.68 | 1.12 | 10.09 |
| Maris Piper | 2 | N100 : S15 | 76.76% | 23.24% | 0.53 | 0.54 | 7.62  |
| Maris Piper | 2 | N100 : S40 | 78.66% | 21.34% | 0.61 | 0.18 | 8.73  |
| Maris Piper | 2 | N200 : S0  | 75.68% | 24.32% | 0.45 | 1.65 | 13.75 |
| Maris Piper | 2 | N200 : S15 | 76.63% | 23.37% | 0.46 | 0.98 | 10.92 |
| Maris Piper | 2 | N200 : S40 | 76.41% | 23.59% | 0.31 | 0.30 | 6.62  |
| Maris Piper | 3 | N0 : S0    | 77.90% | 22.10% | 2.50 | 4.94 | 12.63 |
| Maris Piper | 3 | N0 : S15   | 76.81% | 23.19% | 0.86 | 0.03 | 9.78  |
| Maris Piper | 3 | N0 : S40   | 76.99% | 23.01% | 0.70 | 0.50 | 9.13  |
| Maris Piper | 3 | N100 : S0  | 74.45% | 25.55% | 0.36 | 0.10 | 8.69  |
| Maris Piper | 3 | N100 : S15 | 76.49% | 23.51% | 0.50 | 0.49 | 9.72  |
| Maris Piper | 3 | N100 : S40 | 75.72% | 24.28% | 0.45 | 0.06 | 6.87  |
| Maris Piper | 3 | N200 : S0  | 75.96% | 24.04% | 0.43 | 0.41 | 11.62 |
| Maris Piper | 3 | N200 : S15 | 75.86% | 24.14% | 0.43 | 1.83 | 10.63 |
| Maris Piper | 3 | N200 : S40 | 76.59% | 23.41% | 0.65 | 0.07 | 8.07  |

| variety     | Rep | Treatment (kg/Ha) | Alanine mmol/kg DW | Glycine mmol/kg DW | Valine mmol/kg DW | Leucine mmol/kg DW | Isoleucine mmol/kg DW | Threonine mmol/kg DW |
|-------------|-----|-------------------|--------------------|--------------------|-------------------|--------------------|-----------------------|----------------------|
| Lady Claire | 1   | N0 : S0           | ND                 | ND                 | ND                | ND                 | ND                    | ND                   |
| Lady Claire | 1   | N0 : S15          | ND                 | ND                 | ND                | ND                 | ND                    | ND                   |
| Lady Claire | 1   | N0 : S40          | *                  | *                  | *                 | *                  | *                     | *                    |
| Lady Claire | 1   | N100 : S0         | ND                 | ND                 | ND                | ND                 | ND                    | ND                   |
| Lady Claire | 1   | N100 : S15        | ND                 | ND                 | ND                | ND                 | ND                    | ND                   |
| Lady Claire | 1   | N100 : S40        | 5.06               | ND                 | ND                | ND                 | ND                    | ND                   |
| Lady Claire | 1   | N200 : S0         | 5.14               | ND                 | ND                | ND                 | ND                    | ND                   |
| Lady Claire | 1   | N200 : S15        | ND                 | ND                 | 7.65              | ND                 | ND                    | ND                   |
| Lady Claire | 1   | N200 : S40        | ND                 | ND                 | 6.45              | ND                 | ND                    | ND                   |
| Lady Claire | 2   | N0 : S0           | ND                 | ND                 | 5.77              | ND                 | ND                    | ND                   |
| Lady Claire | 2   | N0 : S15          | ND                 | ND                 | 4.68              | ND                 | ND                    | ND                   |
| Lady Claire | 2   | N0 : S40          | ND                 | ND                 | ND                | ND                 | ND                    | ND                   |
| Lady Claire | 2   | N100 : S0         | ND                 | ND                 | 4.64              | ND                 | ND                    | ND                   |
| Lady Claire | 2   | N100 : S15        | ND                 | ND                 | ND                | ND                 | ND                    | ND                   |
| Lady Claire | 2   | N100 : S40        | ND                 | ND                 | 5.57              | ND                 | ND                    | ND                   |
| Lady Claire | 2   | N200 : S0         | ND                 | ND                 | 7.48              | ND                 | ND                    | ND                   |
| Lady Claire | 2   | N200 : S15        | ND                 | ND                 | 7.24              | ND                 | ND                    | ND                   |
| Lady Claire | 2   | N200 : S40        | ND                 | ND                 | 5.49              | ND                 | ND                    | ND                   |
| Lady Claire | 3   | N0 : S0           | ND                 | ND                 | 5.27              | ND                 | ND                    | ND                   |
| Lady Claire | 3   | N0 : S15          | ND                 | ND                 | 4.42              | ND                 | ND                    | ND                   |
| Lady Claire | 3   | N0 : S40          | ND                 | ND                 | ND                | ND                 | ND                    | ND                   |
| Lady Claire | 3   | N100 : S0         | ND                 | ND                 | 7.17              | ND                 | ND                    | ND                   |
| Lady Claire | 3   | N100 : S15        | ND                 | ND                 | 7.26              | ND                 | ND                    | ND                   |
| Lady Claire | 3   | N100 : S40        | ND                 | ND                 | 6.35              | ND                 | ND                    | ND                   |
| Lady Claire | 3   | N200 : S0         | ND                 | ND                 | 6.53              | ND                 | ND                    | ND                   |
| Lady Claire | 3   | N200 : S15        | ND                 | ND                 | 8.47              | ND                 | ND                    | ND                   |
| Lady Claire | 3   | N200 : S40        | ND                 | ND                 | 6.64              | ND                 | ND                    | ND                   |
| Daisy       | 1   | N0 : S0           | ND                 | ND                 | 5.30              | ND                 | ND                    | ND                   |
| Daisy       | 1   | N0 : S15          | ND                 | ND                 | 7.77              | ND                 | ND                    | ND                   |
| Daisy       | 1   | N0 : S40          | *                  | *                  | *                 | *                  | *                     | *                    |
| Daisy       | 1   | N100 : S0         | ND                 | ND                 | 6.20              | ND                 | ND                    | ND                   |
| Daisy       | 1   | N100 : S15        | ND                 | ND                 | 6.86              | ND                 | ND                    | ND                   |
| Daisy       | 1   | N100 : S40        | ND                 | ND                 | 5.68              | ND                 | ND                    | ND                   |
| Daisy       | 1   | N200 : S0         | ND                 | ND                 | 7.14              | ND                 | ND                    | ND                   |
| Daisy       | 1   | N200 : S15        | ND                 | ND                 | 9.30              | ND                 | ND                    | ND                   |
| Daisy       | 1   | N200 : S40        | ND                 | ND                 | 6.52              | ND                 | ND                    | ND                   |
| Daisy       | 2   | N0 : S0           | ND                 | ND                 | 4.63              | ND                 | ND                    | ND                   |
| Daisy       | 2   | N0 : S15          | ND                 | ND                 | 5.38              | ND                 | ND                    | ND                   |
| Daisy       | 2   | N0 : S40          | ND                 | ND                 | 4.51              | ND                 | ND                    | ND                   |
| Daisy       | 2   | N100 : S0         | ND                 | ND                 | 5.77              | ND                 | ND                    | ND                   |
| Daisy       | 2   | N100 : S15        | ND                 | ND                 | 8.88              | ND                 | ND                    | ND                   |
| Daisy       | 2   | N100 : S40        | ND                 | ND                 | 6.11              | ND                 | ND                    | ND                   |
| Daisy       | 2   | N200 : S0         | ND                 | ND                 | 6.11              | ND                 | ND                    | ND                   |
| Daisy       | 2   | N200 : S15        | ND                 | ND                 | 7.14              | ND                 | ND                    | ND                   |
| Daisy       | 2   | N200 : S40        | ND                 | ND                 | 6.51              | ND                 | ND                    | ND                   |
| Daisy       | 3   | N0 : S0           | ND                 | ND                 | 6.58              | ND                 | ND                    | ND                   |
| Daisy       | 3   | N0 : S15          | ND                 | ND                 | 8.26              | ND                 | ND                    | ND                   |



|          |   |            |      |    |       |    |      |    |
|----------|---|------------|------|----|-------|----|------|----|
| Daisy    | 3 | N0 : S40   | ND   | ND | 6.05  | ND | ND   | ND |
| Daisy    | 3 | N100 : S0  | ND   | ND | 6.46  | ND | ND   | ND |
| Daisy    | 3 | N100 : S15 | ND   | ND | 6.23  | ND | ND   | ND |
| Daisy    | 3 | N100 : S40 | ND   | ND | 9.05  | ND | ND   | ND |
| Daisy    | 3 | N200 : S0  | ND   | ND | 7.31  | ND | ND   | ND |
| Daisy    | 3 | N200 : S15 | ND   | ND | 5.77  | ND | ND   | ND |
| Daisy    | 3 | N200 : S40 | ND   | ND | ND    | ND | ND   | ND |
| Harmony  | 1 | N0 : S0    | ND   | ND | ND    | ND | ND   | ND |
| Harmony  | 1 | N0 : S15   | ND   | ND | ND    | ND | ND   | ND |
| Harmony  | 1 | N0 : S40   | *    | *  | *     | *  | *    | *  |
| Harmony  | 1 | N100 : S0  | ND   | ND | 6.96  | ND | ND   | ND |
| Harmony  | 1 | N100 : S15 | ND   | ND | 5.26  | ND | ND   | ND |
| Harmony  | 1 | N100 : S40 | ND   | ND | 6.62  | ND | ND   | ND |
| Harmony  | 1 | N200 : S0  | ND   | ND | 10.68 | ND | ND   | ND |
| Harmony  | 1 | N200 : S15 | ND   | ND | 10.35 | ND | ND   | ND |
| Harmony  | 1 | N200 : S40 | ND   | ND | 8.15  | ND | ND   | ND |
| Harmony  | 2 | N0 : S0    | ND   | ND | 5.97  | ND | ND   | ND |
| Harmony  | 2 | N0 : S15   | ND   | ND | ND    | ND | ND   | ND |
| Harmony  | 2 | N0 : S40   | ND   | ND | 6.12  | ND | ND   | ND |
| Harmony  | 2 | N100 : S0  | ND   | ND | 8.15  | ND | ND   | ND |
| Harmony  | 2 | N100 : S15 | ND   | ND | 5.76  | ND | ND   | ND |
| Harmony  | 2 | N100 : S40 | ND   | ND | 7.58  | ND | ND   | ND |
| Harmony  | 2 | N200 : S0  | ND   | ND | 10.77 | ND | ND   | ND |
| Harmony  | 2 | N200 : S15 | ND   | ND | 7.96  | ND | ND   | ND |
| Harmony  | 2 | N200 : S40 | ND   | ND | 11.84 | ND | ND   | ND |
| Harmony  | 3 | N0 : S0    | ND   | ND | 8.89  | ND | ND   | ND |
| Harmony  | 3 | N0 : S15   | ND   | ND | ND    | ND | ND   | ND |
| Harmony  | 3 | N0 : S40   | ND   | ND | 5.80  | ND | ND   | ND |
| Harmony  | 3 | N100 : S0  | ND   | ND | 5.67  | ND | ND   | ND |
| Harmony  | 3 | N100 : S15 | ND   | ND | 8.59  | ND | ND   | ND |
| Harmony  | 3 | N100 : S40 | ND   | ND | 9.84  | ND | ND   | ND |
| Harmony  | 3 | N200 : S0  | ND   | ND | 7.88  | ND | ND   | ND |
| Harmony  | 3 | N200 : S15 | ND   | ND | 9.08  | ND | ND   | ND |
| Harmony  | 3 | N200 : S40 | ND   | ND | 9.42  | ND | ND   | ND |
| Umatilla | 1 | N0 : S0    | ND   | ND | 9.49  | ND | ND   | ND |
| Umatilla | 1 | N0 : S15   | ND   | ND | 9.73  | ND | ND   | ND |
| Umatilla | 1 | N0 : S40   | ND   | ND | 13.13 | ND | 5.02 | ND |
| Umatilla | 1 | N100 : S0  | ND   | ND | 12.37 | ND | ND   | ND |
| Umatilla | 1 | N100 : S15 | ND   | ND | 12.51 | ND | ND   | ND |
| Umatilla | 1 | N100 : S40 | ND   | ND | 13.05 | ND | 4.97 | ND |
| Umatilla | 1 | N200 : S0  | ND   | ND | 15.08 | ND | 5.77 | ND |
| Umatilla | 1 | N200 : S15 | ND   | ND | 13.11 | ND | 4.98 | ND |
| Umatilla | 1 | N200 : S40 | 4.85 | ND | 14.39 | ND | 5.83 | ND |
| Umatilla | 2 | N0 : S0    | ND   | ND | 9.69  | ND | ND   | ND |
| Umatilla | 2 | N0 : S15   | ND   | ND | 9.69  | ND | ND   | ND |
| Umatilla | 2 | N0 : S40   | ND   | ND | 10.41 | ND | ND   | ND |
| Umatilla | 2 | N100 : S0  | ND   | ND | 11.27 | ND | ND   | ND |
| Umatilla | 2 | N100 : S15 | ND   | ND | 10.93 | ND | ND   | ND |
| Umatilla | 2 | N100 : S40 | ND   | ND | 10.66 | ND | ND   | ND |
| Umatilla | 2 | N200 : S0  | ND   | ND | 11.74 | ND | ND   | ND |

|              |   |            |      |    |       |    |      |      |
|--------------|---|------------|------|----|-------|----|------|------|
| Umatilla     | 2 | N200 : S15 | ND   | ND | 14.92 | ND | 5.66 | ND   |
| Umatilla     | 2 | N200 : S40 | 5.09 | ND | 15.44 | ND | 5.60 | ND   |
| Umatilla     | 3 | N0 : S15   | ND   | ND | 11.03 | ND | ND   | ND   |
| Umatilla     | 3 | N0 : S40   | ND   | ND | 12.97 | ND | 4.57 | ND   |
| Umatilla     | 3 | N100 : S0  | ND   | ND | 9.91  | ND | ND   | ND   |
| Umatilla     | 3 | N100 : S15 | 4.71 | ND | 13.71 | ND | 4.91 | ND   |
| Umatilla     | 3 | N100 : S40 | ND   | ND | 10.61 | ND | ND   | ND   |
| Umatilla     | 3 | N200 : S0  | ND   | ND | 12.41 | ND | 4.39 | ND   |
| Umatilla     | 3 | N200 : S15 | ND   | ND | 9.46  | ND | ND   | ND   |
| Umatilla     | 3 | N200 : S40 | ND   | ND | 14.73 | ND | 5.68 | ND   |
| Umatilla     | 3 | N0 : S0    | ND   | ND | 10.97 | ND | ND   | ND   |
| Lady Rosetta | 1 | N0 : S0    | ND   | ND | ND    | ND | ND   | ND   |
| Lady Rosetta | 1 | N0 : S15   | ND   | ND | ND    | ND | ND   | ND   |
| Lady Rosetta | 1 | N0 : S40   | ND   | ND | ND    | ND | ND   | ND   |
| Lady Rosetta | 1 | N100 : S0  | ND   | ND | 4.92  | ND | ND   | ND   |
| Lady Rosetta | 1 | N100 : S15 | ND   | ND | 4.78  | ND | ND   | ND   |
| Lady Rosetta | 1 | N100 : S40 | ND   | ND | 7.38  | ND | 4.19 | ND   |
| Lady Rosetta | 1 | N200 : S0  | ND   | ND | 4.44  | ND | ND   | ND   |
| Lady Rosetta | 1 | N200 : S15 | ND   | ND | 5.00  | ND | ND   | ND   |
| Lady Rosetta | 1 | N200 : S40 | ND   | ND | 5.43  | ND | ND   | 3.81 |
| Lady Rosetta | 2 | N0 : S0    | ND   | ND | ND    | ND | ND   | ND   |
| Lady Rosetta | 2 | N0 : S15   | ND   | ND | ND    | ND | ND   | ND   |
| Lady Rosetta | 2 | N0 : S40   | ND   | ND | ND    | ND | ND   | ND   |
| Lady Rosetta | 2 | N100 : S40 | *    | *  | *     | *  | *    | *    |
| Lady Rosetta | 2 | N200 : S0  | ND   | ND | 3.91  | ND | ND   | ND   |
| Lady Rosetta | 2 | N200 : S15 | ND   | ND | 5.11  | ND | ND   | ND   |
| Lady Rosetta | 2 | N200 : S40 | ND   | ND | 4.02  | ND | ND   | ND   |
| Lady Rosetta | 3 | N0 : S0    | ND   | ND | 3.96  | ND | ND   | ND   |
| Lady Rosetta | 3 | N0 : S15   | ND   | ND | ND    | ND | ND   | ND   |
| Lady Rosetta | 3 | N0 : S40   | ND   | ND | ND    | ND | ND   | ND   |
| Lady Rosetta | 3 | N100 : S0  | ND   | ND | 4.16  | ND | ND   | ND   |
| Lady Rosetta | 3 | N100 : S15 | ND   | ND | 3.80  | ND | ND   | ND   |
| Lady Rosetta | 3 | N100 : S40 | ND   | ND | 3.95  | ND | ND   | ND   |
| Lady Rosetta | 3 | N200 : S0  | ND   | ND | 4.32  | ND | ND   | ND   |
| Lady Rosetta | 3 | N200 : S15 | 4.74 | ND | 4.53  | ND | ND   | 3.64 |
| Lady Rosetta | 3 | N200 : S40 | 4.43 | ND | 4.35  | ND | ND   | ND   |
| Lady Rosetta | 2 | N100 : S0  | 4.36 | ND | 3.89  | ND | ND   | ND   |
| Lady Rosetta | 2 | N100 : S15 | ND   | ND | 3.91  | ND | ND   | ND   |
| Saturna      | 1 | N0 : S0    | ND   | ND | 4.41  | ND | ND   | ND   |
| Saturna      | 1 | N0 : S15   | ND   | ND | ND    | ND | ND   | ND   |
| Saturna      | 1 | N0 : S40   | ND   | ND | ND    | ND | ND   | ND   |
| Saturna      | 1 | N100 : S0  | ND   | ND | ND    | ND | ND   | ND   |
| Saturna      | 1 | N100 : S15 | *    | *  | *     | *  | *    | *    |
| Saturna      | 1 | N100 : S40 | ND   | ND | ND    | ND | ND   | ND   |
| Saturna      | 1 | N200 : S0  | ND   | ND | ND    | ND | ND   | ND   |
| Saturna      | 1 | N200 : S15 | ND   | ND | 5.62  | ND | ND   | ND   |
| Saturna      | 1 | N200 : S40 | ND   | ND | 5.96  | ND | ND   | ND   |
| Saturna      | 2 | N0 : S0    | ND   | ND | ND    | ND | ND   | ND   |
| Saturna      | 2 | N0 : S15   | ND   | ND | 4.20  | ND | ND   | ND   |
| Saturna      | 2 | N0 : S40   | ND   | ND | 5.14  | ND | ND   | ND   |

|         |   |            |      |    |       |      |      |      |
|---------|---|------------|------|----|-------|------|------|------|
| Saturna | 2 | N100 : S0  | ND   | ND | 5.53  | ND   | ND   | ND   |
| Saturna | 2 | N100 : S15 | ND   | ND | 4.41  | ND   | ND   | ND   |
| Saturna | 2 | N100 : S40 | ND   | ND | 7.24  | ND   | ND   | ND   |
| Saturna | 2 | N200 : S0  | ND   | ND | 5.46  | ND   | ND   | ND   |
| Saturna | 2 | N200 : S15 | ND   | ND | 7.97  | ND   | 4.50 | ND   |
| Saturna | 2 | N200 : S40 | ND   | ND | 6.11  | ND   | ND   | ND   |
| Saturna | 3 | N0 : S0    | ND   | ND | 4.10  | ND   | ND   | ND   |
| Saturna | 3 | N0 : S15   | ND   | ND | 5.57  | ND   | ND   | ND   |
| Saturna | 3 | N0 : S40   | ND   | ND | 5.18  | ND   | ND   | ND   |
| Saturna | 3 | N100 : S0  | ND   | ND | 5.40  | ND   | ND   | ND   |
| Saturna | 3 | N100 : S15 | ND   | ND | 5.14  | ND   | ND   | ND   |
| Saturna | 3 | N100 : S40 | ND   | ND | 6.23  | ND   | ND   | ND   |
| Saturna | 3 | N200 : S0  | 5.13 | ND | 7.60  | ND   | ND   | ND   |
| Saturna | 3 | N200 : S15 | ND   | ND | 5.60  | ND   | ND   | ND   |
| Saturna | 3 | N200 : S40 | ND   | ND | 7.68  | ND   | ND   | ND   |
| Hermes  | 1 | N0 : S0    | 5.04 | ND | 7.22  | ND   | ND   | ND   |
| Hermes  | 1 | N0 : S15   | ND   | ND | 6.38  | ND   | ND   | ND   |
| Hermes  | 1 | N0 : S40   | ND   | ND | 7.37  | ND   | ND   | ND   |
| Hermes  | 1 | N100 : S0  | ND   | ND | 7.64  | ND   | ND   | 4.44 |
| Hermes  | 1 | N100 : S15 | ND   | ND | 7.07  | ND   | ND   | ND   |
| Hermes  | 1 | N100 : S40 | 4.82 | ND | 8.52  | ND   | 4.50 | 5.85 |
| Hermes  | 1 | N200 : S0  | 5.82 | ND | 10.19 | ND   | 4.92 | 6.10 |
| Hermes  | 1 | N200 : S15 | 8.03 | ND | 16.15 | 5.08 | 7.58 | 5.62 |
| Hermes  | 1 | N200 : S40 | 5.63 | ND | 10.99 | ND   | 5.32 | ND   |
| Hermes  | 2 | N0 : S0    | 4.34 | ND | 7.75  | ND   | ND   | 4.67 |
| Hermes  | 2 | N0 : S15   | ND   | ND | 7.48  | ND   | ND   | ND   |
| Hermes  | 2 | N0 : S40   | 4.56 | ND | 8.27  | ND   | 4.21 | 4.60 |
| Hermes  | 2 | N100 : S0  | ND   | ND | 5.43  | ND   | ND   | ND   |
| Hermes  | 2 | N100 : S15 | 4.64 | ND | 8.44  | ND   | 4.16 | 4.82 |
| Hermes  | 2 | N100 : S40 | 4.63 | ND | 8.42  | ND   | 4.35 | ND   |
| Hermes  | 2 | N200 : S0  | 4.89 | ND | 7.33  | ND   | ND   | 5.77 |
| Hermes  | 2 | N200 : S15 | 5.98 | ND | 10.05 | ND   | 4.80 | ND   |
| Hermes  | 2 | N200 : S40 | 4.75 | ND | 9.18  | ND   | 4.07 | 5.53 |
| Hermes  | 3 | N0 : S0    | ND   | ND | 5.86  | ND   | ND   | ND   |
| Hermes  | 3 | N0 : S15   | ND   | ND | 6.72  | ND   | ND   | 4.43 |
| Hermes  | 3 | N0 : S40   | ND   | ND | 5.71  | ND   | ND   | 4.28 |
| Hermes  | 3 | N100 : S0  | ND   | ND | 6.35  | ND   | ND   | ND   |
| Hermes  | 3 | N100 : S15 | ND   | ND | 8.81  | ND   | 4.49 | ND   |
| Hermes  | 3 | N100 : S40 | 5.82 | ND | 8.71  | ND   | 4.37 | 6.03 |
| Hermes  | 3 | N200 : S0  | 5.38 | ND | 10.50 | ND   | 4.90 | 4.29 |
| Hermes  | 3 | N200 : S15 | 4.62 | ND | 9.13  | ND   | 4.48 | 5.44 |
| Hermes  | 3 | N200 : S40 | 4.47 | ND | 7.56  | ND   | ND   | ND   |
| Verdi   | 1 | N0 : S0    | ND   | ND | ND    | ND   | ND   | ND   |
| Verdi   | 1 | N0 : S15   | ND   | ND | ND    | ND   | ND   | ND   |
| Verdi   | 1 | N0 : S40   | ND   | ND | ND    | ND   | ND   | ND   |
| Verdi   | 1 | N100 : S0  | ND   | ND | ND    | ND   | ND   | ND   |
| Verdi   | 1 | N100 : S15 | ND   | ND | ND    | ND   | ND   | ND   |
| Verdi   | 1 | N100 : S40 | ND   | ND | ND    | ND   | ND   | ND   |
| Verdi   | 1 | N200 : S0  | ND   | ND | ND    | ND   | ND   | ND   |
| Verdi   | 1 | N200 : S15 | ND   | ND | ND    | ND   | ND   | ND   |

|              |   |            |      |    |       |    |      |      |
|--------------|---|------------|------|----|-------|----|------|------|
| Verdi        | 1 | N200 : S40 | ND   | ND | ND    | ND | ND   | ND   |
| Verdi        | 2 | N0 : S0    | ND   | ND | ND    | ND | ND   | ND   |
| Verdi        | 2 | N0 : S15   | ND   | ND | ND    | ND | ND   | ND   |
| Verdi        | 2 | N0 : S40   | ND   | ND | ND    | ND | ND   | ND   |
| Verdi        | 2 | N100 : S0  | ND   | ND | ND    | ND | ND   | ND   |
| Verdi        | 2 | N100 : S15 | ND   | ND | ND    | ND | ND   | ND   |
| Verdi        | 2 | N100 : S40 | ND   | ND | ND    | ND | ND   | ND   |
| Verdi        | 2 | N200 : S0  | ND   | ND | ND    | ND | ND   | ND   |
| Verdi        | 2 | N200 : S15 | ND   | ND | ND    | ND | ND   | ND   |
| Verdi        | 2 | N200 : S40 | ND   | ND | ND    | ND | ND   | ND   |
| Verdi        | 3 | N0 : S0    | ND   | ND | ND    | ND | ND   | ND   |
| Verdi        | 3 | N0 : S15   | ND   | ND | ND    | ND | ND   | ND   |
| Verdi        | 3 | N0 : S40   | ND   | ND | ND    | ND | ND   | ND   |
| Verdi        | 3 | N100 : S0  | ND   | ND | ND    | ND | ND   | ND   |
| Verdi        | 3 | N100 : S15 | ND   | ND | ND    | ND | ND   | ND   |
| Verdi        | 3 | N100 : S40 | ND   | ND | ND    | ND | ND   | ND   |
| Verdi        | 3 | N200 : S0  | ND   | ND | ND    | ND | ND   | ND   |
| Verdi        | 3 | N200 : S15 | ND   | ND | ND    | ND | ND   | ND   |
| Verdi        | 3 | N200 : S40 | ND   | ND | ND    | ND | ND   | ND   |
| Pentland Del | 1 | N0 : S0    | 4.63 | ND | 8.35  | ND | ND   | 4.49 |
| Pentland Del | 1 | N0 : S15   | ND   | ND | 7.47  | ND | ND   | ND   |
| Pentland Del | 1 | N0 : S40   | 5.40 | ND | 11.12 | ND | ND   | ND   |
| Pentland Del | 1 | N100 : S0  | 6.74 | ND | 8.38  | ND | ND   | ND   |
| Pentland Del | 1 | N100 : S15 | 8.11 | ND | 13.16 | ND | 5.44 | ND   |
| Pentland Del | 1 | N100 : S40 | 5.50 | ND | 8.67  | ND | ND   | ND   |
| Pentland Del | 1 | N200 : S0  | 7.33 | ND | 8.65  | ND | ND   | 4.98 |
| Pentland Del | 1 | N200 : S15 | 8.88 | ND | 12.23 | ND | ND   | 6.28 |
| Pentland Del | 1 | N200 : S40 | 6.73 | ND | 10.55 | ND | ND   | ND   |
| Pentland Del | 2 | N0 : S0    | 4.42 | ND | 8.62  | ND | ND   | 4.72 |
| Pentland Del | 2 | N0 : S15   | 8.20 | ND | 10.84 | ND | ND   | 4.99 |
| Pentland Del | 2 | N0 : S40   | 5.77 | ND | 11.62 | ND | 4.75 | ND   |
| Pentland Del | 2 | N100 : S0  | 5.47 | ND | 9.17  | ND | ND   | ND   |
| Pentland Del | 2 | N100 : S15 | 7.30 | ND | 11.08 | ND | ND   | ND   |
| Pentland Del | 2 | N100 : S40 | 8.62 | ND | 13.30 | ND | 5.54 | ND   |
| Pentland Del | 2 | N200 : S0  | 7.09 | ND | 7.09  | ND | ND   | 4.18 |
| Pentland Del | 2 | N200 : S15 | 6.50 | ND | 9.66  | ND | ND   | 5.50 |
| Pentland Del | 2 | N200 : S40 | 7.83 | ND | 10.11 | ND | 4.27 | ND   |
| Pentland Del | 3 | N0 : S0    | 4.58 | ND | 8.79  | ND | ND   | ND   |
| Pentland Del | 3 | N0 : S15   | 5.13 | ND | 9.47  | ND | ND   | ND   |
| Pentland Del | 3 | N0 : S40   | 4.91 | ND | 8.94  | ND | ND   | ND   |
| Pentland Del | 3 | N100 : S0  | 6.59 | ND | 12.08 | ND | ND   | ND   |
| Pentland Del | 3 | N100 : S15 | 8.56 | ND | 10.40 | ND | 4.33 | ND   |
| Pentland Del | 3 | N100 : S40 | 6.73 | ND | 8.96  | ND | ND   | ND   |
| Pentland Del | 3 | N200 : S0  | 6.48 | ND | 10.75 | ND | 4.24 | ND   |
| Pentland Del | 3 | N200 : S15 | *    | *  | *     | *  | *    | *    |
| Pentland Del | 3 | N200 : S40 | 7.28 | ND | 10.24 | ND | ND   | ND   |
| usset Burbar | 1 | N0 : S0    | ND   | ND | 9.87  | ND | ND   | ND   |
| usset Burbar | 1 | N0 : S15   | ND   | ND | 6.29  | ND | ND   | ND   |
| usset Burbar | 1 | N0 : S40   | ND   | ND | 7.45  | ND | ND   | ND   |
| usset Burbar | 1 | N100 : S0  | ND   | ND | 12.31 | ND | 4.86 | ND   |

|              |   |            |       |    |       |      |       |       |
|--------------|---|------------|-------|----|-------|------|-------|-------|
| usset Burbar | 1 | N100 : S15 | ND    | ND | 11.24 | ND   | ND    | ND    |
| usset Burbar | 1 | N100 : S40 | ND    | ND | 13.95 | ND   | 5.18  | ND    |
| usset Burbar | 1 | N200 : S0  | 5.73  | ND | 17.65 | ND   | 7.17  | 4.90  |
| usset Burbar | 1 | N200 : S15 | ND    | ND | 10.30 | ND   | ND    | ND    |
| usset Burbar | 1 | N200 : S40 | ND    | ND | 14.37 | ND   | 5.14  | ND    |
| usset Burbar | 2 | N0 : S0    | ND    | ND | 12.82 | ND   | 4.81  | ND    |
| usset Burbar | 2 | N0 : S15   | ND    | ND | 9.86  | ND   | 3.99  | ND    |
| usset Burbar | 2 | N0 : S40   | ND    | ND | 11.95 | ND   | ND    | ND    |
| usset Burbar | 2 | N100 : S0  | ND    | ND | 13.37 | ND   | 4.89  | ND    |
| usset Burbar | 2 | N100 : S15 | ND    | ND | 13.96 | ND   | 5.71  | ND    |
| usset Burbar | 2 | N100 : S40 | ND    | ND | 11.32 | ND   | ND    | ND    |
| usset Burbar | 2 | N200 : S0  | 5.28  | ND | 15.74 | ND   | 5.88  | ND    |
| usset Burbar | 2 | N200 : S15 | ND    | ND | 13.11 | ND   | 5.02  | ND    |
| usset Burbar | 2 | N200 : S40 | 5.99  | ND | 15.54 | ND   | 6.07  | 4.45  |
| usset Burbar | 3 | N0 : S0    | 5.18  | ND | 16.23 | ND   | 6.20  | ND    |
| usset Burbar | 3 | N0 : S15   | ND    | ND | 11.92 | ND   | 4.71  | ND    |
| usset Burbar | 3 | N0 : S40   | ND    | ND | 12.10 | ND   | 4.77  | ND    |
| usset Burbar | 3 | N100 : S0  | 18.76 | ND | 16.41 | ND   | 6.25  | 13.34 |
| usset Burbar | 3 | N100 : S15 | 4.86  | ND | 12.89 | ND   | 5.08  | ND    |
| usset Burbar | 3 | N100 : S40 | 5.41  | ND | 14.29 | ND   | 5.64  | 4.15  |
| usset Burbar | 3 | N200 : S0  | 7.66  | ND | 20.80 | 4.39 | 8.19  | 5.81  |
| usset Burbar | 3 | N200 : S15 | 5.50  | ND | 14.25 | ND   | 5.63  | ND    |
| usset Burbar | 3 | N200 : S40 | 10.63 | ND | 27.29 | 6.34 | 11.79 | 6.18  |
| King Edward  | 1 | N0 : S0    | 5.27  | ND | 8.62  | ND   | ND    | ND    |
| King Edward  | 1 | N0 : S15   | 8.84  | ND | 12.19 | ND   | ND    | ND    |
| King Edward  | 1 | N0 : S40   | 7.15  | ND | 8.77  | ND   | ND    | ND    |
| King Edward  | 1 | N100 : S0  | 12.98 | ND | 11.72 | ND   | ND    | ND    |
| King Edward  | 1 | N100 : S15 | 12.93 | ND | 11.53 | ND   | 4.60  | ND    |
| King Edward  | 1 | N100 : S40 | 15.25 | ND | 11.68 | ND   | ND    | ND    |
| King Edward  | 1 | N200 : S0  | 7.12  | ND | 8.33  | ND   | 3.38  | ND    |
| King Edward  | 1 | N200 : S15 | 9.70  | ND | 10.96 | ND   | 4.49  | ND    |
| King Edward  | 1 | N200 : S40 | 12.69 | ND | 14.42 | ND   | 6.12  | 5.10  |
| King Edward  | 2 | N0 : S0    | 8.20  | ND | 8.61  | ND   | ND    | ND    |
| King Edward  | 2 | N0 : S15   | 7.57  | ND | 10.25 | ND   | ND    | ND    |
| King Edward  | 2 | N0 : S40   | 9.33  | ND | 10.98 | ND   | 4.36  | ND    |
| King Edward  | 2 | N100 : S0  | 10.60 | ND | 12.42 | ND   | ND    | 4.96  |
| King Edward  | 2 | N100 : S15 | 12.28 | ND | 13.12 | ND   | 4.82  | 5.15  |
| King Edward  | 2 | N100 : S40 | 7.78  | ND | 10.17 | ND   | ND    | ND    |
| King Edward  | 2 | N200 : S0  | 13.22 | ND | 10.87 | ND   | 4.46  | ND    |
| King Edward  | 2 | N200 : S15 | 11.38 | ND | 11.23 | ND   | 4.58  | 4.37  |
| King Edward  | 2 | N200 : S40 | 10.81 | ND | 13.30 | ND   | 5.27  | 5.11  |
| King Edward  | 3 | N0 : S0    | 4.45  | ND | 9.76  | ND   | ND    | ND    |
| King Edward  | 3 | N0 : S15   | 7.78  | ND | 11.25 | ND   | ND    | ND    |
| King Edward  | 3 | N0 : S40   | ND    | ND | 8.54  | ND   | ND    | ND    |
| King Edward  | 3 | N100 : S0  | 6.31  | ND | 19.71 | ND   | 7.55  | 5.70  |
| King Edward  | 3 | N100 : S15 | 10.99 | ND | 14.66 | ND   | 5.40  | 5.94  |
| King Edward  | 3 | N100 : S40 | 13.28 | ND | 15.55 | ND   | 6.25  | 6.23  |
| King Edward  | 3 | N200 : S0  | 8.09  | ND | 11.12 | ND   | ND    | 4.37  |
| King Edward  | 3 | N200 : S15 | 12.86 | ND | 13.92 | ND   | 5.32  | 4.93  |
| King Edward  | 3 | N200 : S40 | 13.82 | ND | 13.66 | ND   | 5.22  | 5.14  |

|             |   |            |      |    |       |    |      |       |
|-------------|---|------------|------|----|-------|----|------|-------|
| Markies     | 1 | N0 : S0    | 7.02 | ND | 4.67  | ND | ND   | ND    |
| Markies     | 1 | N0 : S15   | 6.70 | ND | 5.11  | ND | ND   | ND    |
| Markies     | 1 | N0 : S40   | 4.91 | ND | 4.10  | ND | ND   | 11.50 |
| Markies     | 1 | N100 : S0  | 6.42 | ND | 4.47  | ND | ND   | 12.93 |
| Markies     | 1 | N100 : S15 | 7.13 | ND | 4.42  | ND | ND   | 11.50 |
| Markies     | 1 | N100 : S40 | 4.31 | ND | 5.08  | ND | ND   | 12.76 |
| Markies     | 1 | N200 : S0  | 4.14 | ND | 4.58  | ND | ND   | ND    |
| Markies     | 1 | N200 : S15 | 7.12 | ND | 9.18  | ND | 4.74 | ND    |
| Markies     | 1 | N200 : S40 | 8.16 | ND | 9.78  | ND | ND   | 18.39 |
| Markies     | 2 | N0 : S0    | 7.85 | ND | ND    | ND | ND   | ND    |
| Markies     | 2 | N0 : S15   | 7.09 | ND | 4.10  | ND | ND   | ND    |
| Markies     | 2 | N0 : S40   | *    | *  | *     | *  | *    | *     |
| Markies     | 2 | N100 : S0  | 5.65 | ND | 5.82  | ND | ND   | 15.94 |
| Markies     | 2 | N100 : S15 | 8.94 | ND | 6.21  | ND | ND   | 15.64 |
| Markies     | 2 | N100 : S40 | 6.26 | ND | 5.04  | ND | ND   | 13.99 |
| Markies     | 2 | N200 : S0  | 7.86 | ND | 7.67  | ND | ND   | ND    |
| Markies     | 2 | N200 : S15 | 7.19 | ND | 6.23  | ND | ND   | ND    |
| Markies     | 2 | N200 : S40 | 9.35 | ND | 7.70  | ND | ND   | 16.33 |
| Markies     | 3 | N0 : S0    | 4.92 | ND | 3.87  | ND | ND   | ND    |
| Markies     | 3 | N0 : S15   | 7.46 | ND | 5.25  | ND | ND   | ND    |
| Markies     | 3 | N0 : S40   | 5.68 | ND | 4.45  | ND | ND   | 12.62 |
| Markies     | 3 | N100 : S0  | 5.29 | ND | 6.20  | ND | ND   | 13.99 |
| Markies     | 3 | N100 : S15 | 4.90 | ND | 5.85  | ND | ND   | 12.39 |
| Markies     | 3 | N100 : S40 | 6.07 | ND | 5.12  | ND | ND   | 12.39 |
| Markies     | 3 | N200 : S0  | 7.49 | ND | 8.31  | ND | ND   | ND    |
| Markies     | 3 | N200 : S15 | 6.86 | ND | 8.64  | ND | ND   | ND    |
| Markies     | 3 | N200 : S40 | *    | *  | *     | *  | *    | *     |
| Maris Piper | 1 | N0 : S0    | 6.62 | ND | 7.04  | ND | ND   | 12.01 |
| Maris Piper | 1 | N0 : S15   | 6.43 | ND | 7.86  | ND | ND   | 11.73 |
| Maris Piper | 1 | N0 : S40   | 7.81 | ND | 8.32  | ND | ND   | 14.32 |
| Maris Piper | 1 | N100 : S0  | 6.98 | ND | 8.90  | ND | 4.16 | 14.58 |
| Maris Piper | 1 | N100 : S15 | 7.31 | ND | 7.89  | ND | ND   | 13.55 |
| Maris Piper | 1 | N100 : S40 | 5.71 | ND | 7.49  | ND | 4.02 | 12.68 |
| Maris Piper | 1 | N200 : S0  | 7.74 | ND | 9.41  | ND | 4.93 | 15.47 |
| Maris Piper | 1 | N200 : S15 | 7.08 | ND | 6.12  | ND | ND   | 13.04 |
| Maris Piper | 1 | N200 : S40 | 4.53 | ND | 7.74  | ND | 4.11 | 12.42 |
| Maris Piper | 2 | N0 : S0    | 7.69 | ND | 5.68  | ND | ND   | 10.13 |
| Maris Piper | 2 | N0 : S15   | 5.72 | ND | 8.05  | ND | ND   | 12.38 |
| Maris Piper | 2 | N0 : S40   | 6.32 | ND | 6.97  | ND | ND   | 11.35 |
| Maris Piper | 2 | N100 : S0  | 8.74 | ND | 8.85  | ND | 4.42 | 14.33 |
| Maris Piper | 2 | N100 : S15 | 7.81 | ND | 7.90  | ND | 4.18 | 13.89 |
| Maris Piper | 2 | N100 : S40 | 6.04 | ND | 8.77  | ND | ND   | 14.21 |
| Maris Piper | 2 | N200 : S0  | 6.66 | ND | 9.43  | ND | 4.71 | 13.75 |
| Maris Piper | 2 | N200 : S15 | 7.91 | ND | 9.50  | ND | 4.51 | 15.25 |
| Maris Piper | 2 | N200 : S40 | 7.32 | ND | 9.87  | ND | 4.89 | 15.15 |
| Maris Piper | 3 | N0 : S0    | 6.35 | ND | 8.76  | ND | ND   | 12.75 |
| Maris Piper | 3 | N0 : S15   | 4.32 | ND | 7.55  | ND | ND   | 12.96 |
| Maris Piper | 3 | N0 : S40   | 7.95 | ND | 9.30  | ND | 4.50 | 14.08 |
| Maris Piper | 3 | N100 : S0  | 6.26 | ND | 8.63  | ND | 4.18 | 14.87 |
| Maris Piper | 3 | N100 : S15 | 4.68 | ND | 10.21 | ND | 4.77 | 14.73 |

|             |   |            |      |    |       |    |      |       |
|-------------|---|------------|------|----|-------|----|------|-------|
| Maris Piper | 3 | N100 : S40 | ND   | ND | 6.46  | ND | ND   | 11.77 |
| Maris Piper | 3 | N200 : S0  | 4.03 | ND | 9.09  | ND | 4.49 | 13.65 |
| Maris Piper | 3 | N200 : S15 | 4.89 | ND | 9.51  | ND | 4.34 | 14.15 |
| Maris Piper | 3 | N200 : S40 | 5.21 | ND | 10.01 | ND | 4.89 | 14.41 |

| Rep | Treatment (kg/Ha) | Serine mmol/kg DW | Proline mmol/kg DW | Asparagine mmol/kg DW | Aspartic acid mmol/kg DW | Methionine mmol/kg DW | Glutamic acid mmol/kg DW |
|-----|-------------------|-------------------|--------------------|-----------------------|--------------------------|-----------------------|--------------------------|
| 1   | N0 : S0           | 6.44              | ND                 | 68.37                 | 17.90                    | ND                    | 23.40                    |
| 1   | N0 : S15          | 5.20              | ND                 | 53.04                 | 15.11                    | ND                    | 20.28                    |
| 1   | N0 : S40          | *                 | *                  | *                     | *                        | *                     | *                        |
| 1   | N100 : S0         | 5.95              | ND                 | 68.81                 | 16.64                    | ND                    | 22.08                    |
| 1   | N100 : S15        | 7.39              | 10.16              | 104.07                | 18.40                    | ND                    | 23.17                    |
| 1   | N100 : S40        | 7.55              | 10.19              | 105.95                | 17.90                    | ND                    | 25.32                    |
| 1   | N200 : S0         | 7.18              | 6.69               | 100.14                | 19.45                    | ND                    | 20.82                    |
| 1   | N200 : S15        | ND                | 9.76               | 37.02                 | 10.76                    | ND                    | 13.38                    |
| 1   | N200 : S40        | ND                | 5.71               | 33.51                 | 9.12                     | ND                    | 12.04                    |
| 2   | N0 : S0           | ND                | ND                 | 21.49                 | 9.05                     | ND                    | 12.73                    |
| 2   | N0 : S15          | ND                | ND                 | 14.53                 | 8.31                     | ND                    | 11.43                    |
| 2   | N0 : S40          | ND                | ND                 | 10.71                 | 7.62                     | ND                    | 10.99                    |
| 2   | N100 : S0         | ND                | ND                 | 17.79                 | 7.66                     | ND                    | 10.31                    |
| 2   | N100 : S15        | ND                | ND                 | 18.97                 | 8.61                     | ND                    | 10.53                    |
| 2   | N100 : S40        | ND                | 6.23               | 31.88                 | 11.19                    | ND                    | 12.79                    |
| 2   | N200 : S0         | ND                | 10.15              | 36.97                 | 9.68                     | ND                    | 13.77                    |
| 2   | N200 : S15        | ND                | 7.14               | 38.60                 | 9.87                     | ND                    | 12.71                    |
| 2   | N200 : S40        | ND                | 5.86               | 32.45                 | 7.71                     | ND                    | 11.88                    |
| 3   | N0 : S0           | ND                | ND                 | 21.40                 | 8.41                     | ND                    | 14.42                    |
| 3   | N0 : S15          | ND                | ND                 | 15.88                 | 7.86                     | ND                    | 10.86                    |
| 3   | N0 : S40          | ND                | ND                 | 10.01                 | 7.60                     | ND                    | 11.00                    |
| 3   | N100 : S0         | ND                | 5.97               | 38.94                 | 10.05                    | ND                    | 13.82                    |
| 3   | N100 : S15        | ND                | ND                 | 26.11                 | 9.67                     | ND                    | 13.17                    |
| 3   | N100 : S40        | ND                | 9.64               | 30.62                 | 9.46                     | ND                    | 13.05                    |
| 3   | N200 : S0         | ND                | 4.82               | 35.17                 | 9.54                     | ND                    | 13.00                    |
| 3   | N200 : S15        | ND                | 6.96               | 36.81                 | 9.64                     | ND                    | 13.09                    |
| 3   | N200 : S40        | ND                | 10.15              | 39.04                 | 10.01                    | ND                    | 13.73                    |
| 1   | N0 : S0           | ND                | ND                 | 5.88                  | 7.75                     | ND                    | 8.34                     |
| 1   | N0 : S15          | ND                | ND                 | 8.13                  | 9.33                     | ND                    | 10.63                    |
| 1   | N0 : S40          | *                 | *                  | *                     | *                        | *                     | *                        |
| 1   | N100 : S0         | ND                | ND                 | 6.54                  | 9.09                     | ND                    | 8.75                     |
| 1   | N100 : S15        | ND                | ND                 | 11.97                 | 9.32                     | ND                    | 10.88                    |
| 1   | N100 : S40        | ND                | ND                 | 6.03                  | 8.83                     | ND                    | 9.31                     |
| 1   | N200 : S0         | ND                | ND                 | 11.21                 | 10.31                    | ND                    | 9.93                     |
| 1   | N200 : S15        | ND                | 8.05               | 22.59                 | 11.43                    | ND                    | 10.86                    |
| 1   | N200 : S40        | ND                | ND                 | 11.30                 | 9.15                     | ND                    | 9.51                     |
| 2   | N0 : S0           | ND                | ND                 | ND                    | 7.59                     | ND                    | 9.08                     |
| 2   | N0 : S15          | ND                | ND                 | ND                    | 8.05                     | ND                    | 9.25                     |
| 2   | N0 : S40          | ND                | ND                 | ND                    | 8.25                     | ND                    | 9.64                     |
| 2   | N100 : S0         | ND                | ND                 | 7.39                  | 9.28                     | ND                    | 9.05                     |
| 2   | N100 : S15        | ND                | 9.89               | 17.26                 | 10.40                    | ND                    | 11.42                    |
| 2   | N100 : S40        | ND                | ND                 | 9.46                  | 9.92                     | ND                    | 9.87                     |
| 2   | N200 : S0         | ND                | 4.77               | 10.65                 | 10.03                    | ND                    | 9.14                     |
| 2   | N200 : S15        | ND                | 5.21               | 17.06                 | 9.56                     | ND                    | 11.29                    |
| 2   | N200 : S40        | ND                | ND                 | 5.26                  | 8.99                     | ND                    | 9.21                     |
| 3   | N0 : S0           | ND                | ND                 | 5.14                  | 10.96                    | ND                    | 10.88                    |
| 3   | N0 : S15          | ND                | 18.09              | 16.89                 | 12.51                    | ND                    | 8.93                     |



|   |            |    |       |       |       |      |       |
|---|------------|----|-------|-------|-------|------|-------|
| 3 | NO : S40   | ND | ND    | 6.53  | 10.66 | ND   | 11.13 |
| 3 | N100 : S0  | ND | 4.92  | 8.25  | 10.62 | ND   | 9.41  |
| 3 | N100 : S15 | ND | ND    | 7.61  | 9.56  | ND   | 8.95  |
| 3 | N100 : S40 | ND | 17.30 | 19.80 | 11.75 | ND   | 9.08  |
| 3 | N200 : S0  | ND | ND    | 11.89 | 10.67 | ND   | 10.16 |
| 3 | N200 : S15 | ND | ND    | 10.15 | 8.85  | ND   | 8.82  |
| 3 | N200 : S40 | ND | ND    | 6.37  | 6.81  | ND   | 5.87  |
| 1 | NO : S0    | ND | ND    | 7.43  | 8.15  | ND   | 7.64  |
| 1 | NO : S15   | ND | ND    | 11.28 | 6.69  | ND   | 6.39  |
| 1 | NO : S40   | *  | *     | *     | *     | *    | *     |
| 1 | N100 : S0  | ND | ND    | 48.81 | 13.65 | ND   | 14.25 |
| 1 | N100 : S15 | ND | ND    | 37.10 | 12.64 | ND   | 10.90 |
| 1 | N100 : S40 | ND | ND    | 51.91 | 13.26 | ND   | 12.22 |
| 1 | N200 : S0  | ND | ND    | 75.63 | 17.15 | ND   | 15.62 |
| 1 | N200 : S15 | ND | ND    | 70.10 | 15.64 | ND   | 14.08 |
| 1 | N200 : S40 | ND | ND    | 46.21 | 14.49 | ND   | 14.75 |
| 2 | NO : S0    | ND | ND    | 34.73 | 12.59 | ND   | 13.06 |
| 2 | NO : S15   | ND | ND    | 12.22 | ND    | ND   | ND    |
| 2 | NO : S40   | ND | ND    | 40.20 | 11.62 | ND   | 12.36 |
| 2 | N100 : S0  | ND | ND    | 40.20 | 13.34 | ND   | 13.99 |
| 2 | N100 : S15 | ND | ND    | 37.37 | 10.22 | ND   | 11.37 |
| 2 | N100 : S40 | ND | ND    | 47.15 | 15.54 | ND   | 14.65 |
| 2 | N200 : S0  | ND | ND    | 72.19 | 15.61 | ND   | 14.69 |
| 2 | N200 : S15 | ND | ND    | 70.04 | 13.91 | ND   | 14.29 |
| 2 | N200 : S40 | ND | 5.59  | 58.51 | 13.86 | ND   | 15.43 |
| 3 | NO : S0    | ND | ND    | 64.85 | 14.00 | ND   | 15.09 |
| 3 | NO : S15   | ND | ND    | 29.42 | 12.69 | ND   | 13.98 |
| 3 | NO : S40   | ND | ND    | 40.52 | 13.53 | ND   | 15.02 |
| 3 | N100 : S0  | ND | ND    | 37.85 | 14.15 | ND   | 14.27 |
| 3 | N100 : S15 | ND | ND    | 62.35 | 15.27 | ND   | 15.18 |
| 3 | N100 : S40 | ND | ND    | 62.15 | 15.80 | ND   | 15.68 |
| 3 | N200 : S0  | ND | ND    | 58.70 | 14.22 | ND   | 13.45 |
| 3 | N200 : S15 | ND | ND    | 76.13 | 15.39 | ND   | 15.58 |
| 3 | N200 : S40 | ND | ND    | 57.56 | 12.99 | ND   | 12.28 |
| 1 | NO : S0    | ND | ND    | 62.95 | 14.74 | ND   | 15.69 |
| 1 | NO : S15   | ND | ND    | 46.87 | 13.38 | ND   | 13.80 |
| 1 | NO : S40   | ND | 6.30  | 60.73 | 17.02 | 4.58 | 19.10 |
| 1 | N100 : S0  | ND | ND    | 63.07 | 16.25 | ND   | 17.62 |
| 1 | N100 : S15 | ND | 11.09 | 72.11 | 14.86 | 4.63 | 14.54 |
| 1 | N100 : S40 | ND | 6.87  | 67.72 | 13.58 | 4.70 | 13.95 |
| 1 | N200 : S0  | ND | ND    | 84.34 | 17.65 | ND   | 17.58 |
| 1 | N200 : S15 | ND | 4.48  | 89.17 | 13.92 | 4.63 | 14.38 |
| 1 | N200 : S40 | ND | 5.63  | 81.23 | 14.91 | 5.18 | 15.82 |
| 2 | NO : S0    | ND | ND    | 47.09 | 14.74 | ND   | 16.61 |
| 2 | NO : S15   | ND | 7.53  | 52.83 | 14.21 | ND   | 16.64 |
| 2 | NO : S40   | ND | ND    | 49.50 | 13.99 | ND   | 17.24 |
| 2 | N100 : S0  | ND | ND    | 56.17 | 14.08 | ND   | 17.28 |
| 2 | N100 : S15 | ND | ND    | 52.58 | 12.05 | ND   | 15.70 |
| 2 | N100 : S40 | ND | ND    | 44.67 | 13.34 | ND   | 17.54 |
| 2 | N200 : S0  | ND | ND    | 65.99 | 13.25 | ND   | 14.98 |

|   |            |    |       |        |       |      |       |
|---|------------|----|-------|--------|-------|------|-------|
| 2 | N200 : S15 | ND | 8.21  | 105.93 | 16.76 | 5.33 | 11.87 |
| 2 | N200 : S40 | ND | 10.70 | 84.57  | 13.99 | 5.51 | 17.92 |
| 3 | NO : S15   | ND | 6.39  | 51.69  | 14.58 | ND   | 14.90 |
| 3 | NO : S40   | ND | 7.48  | 62.28  | 13.57 | ND   | 18.34 |
| 3 | N100 : S0  | ND | 5.70  | 68.92  | 13.19 | ND   | 15.16 |
| 3 | N100 : S15 | ND | 8.01  | 87.29  | 15.14 | ND   | 18.43 |
| 3 | N100 : S40 | ND | ND    | 58.01  | 12.97 | ND   | 14.98 |
| 3 | N200 : S0  | ND | 8.50  | 70.03  | 14.68 | 4.53 | 17.21 |
| 3 | N200 : S15 | ND | 7.29  | 69.08  | 12.87 | ND   | 15.20 |
| 3 | N200 : S40 | ND | 9.61  | 81.49  | 14.25 | ND   | 17.08 |
| 3 | NO : S0    | ND | ND    | 47.44  | 14.40 | ND   | 15.29 |
| 1 | NO : S0    | ND | ND    | 19.82  | 8.28  | ND   | 15.46 |
| 1 | NO : S15   | ND | ND    | 20.22  | 8.87  | ND   | 17.17 |
| 1 | NO : S40   | ND | ND    | 20.01  | 8.19  | ND   | 15.47 |
| 1 | N100 : S0  | ND | ND    | 37.67  | 10.15 | ND   | 19.34 |
| 1 | N100 : S15 | ND | 13.09 | 47.66  | 9.38  | ND   | 17.77 |
| 1 | N100 : S40 | ND | ND    | 67.14  | 14.62 | ND   | 19.03 |
| 1 | N200 : S0  | ND | ND    | 46.00  | 9.47  | ND   | 17.29 |
| 1 | N200 : S15 | ND | 3.89  | 39.04  | 10.04 | ND   | 19.24 |
| 1 | N200 : S40 | ND | 9.17  | 60.44  | 7.96  | ND   | 14.48 |
| 2 | NO : S0    | ND | ND    | 25.18  | 8.63  | ND   | 16.45 |
| 2 | NO : S15   | ND | ND    | 26.08  | 9.47  | ND   | 19.34 |
| 2 | NO : S40   | ND | ND    | 22.76  | 9.17  | ND   | 18.84 |
| 2 | N100 : S40 | *  | *     | *      | *     | *    | *     |
| 2 | N200 : S0  | ND | ND    | 26.68  | 9.99  | ND   | 18.38 |
| 2 | N200 : S15 | ND | ND    | 40.41  | 7.41  | ND   | 16.61 |
| 2 | N200 : S40 | ND | ND    | 38.28  | 7.48  | ND   | 15.99 |
| 3 | NO : S0    | ND | ND    | 40.84  | 12.04 | ND   | 15.07 |
| 3 | NO : S15   | ND | ND    | 20.46  | 8.90  | ND   | 17.11 |
| 3 | NO : S40   | ND | ND    | 18.01  | 8.93  | ND   | 18.38 |
| 3 | N100 : S0  | ND | 7.90  | 36.32  | 8.93  | ND   | 15.33 |
| 3 | N100 : S15 | ND | ND    | 21.24  | 9.28  | ND   | 17.47 |
| 3 | N100 : S40 | ND | 7.22  | 35.86  | 10.07 | ND   | 17.10 |
| 3 | N200 : S0  | ND | 11.07 | 38.76  | 8.46  | ND   | 15.61 |
| 3 | N200 : S15 | ND | ND    | 38.87  | 5.64  | ND   | 14.59 |
| 3 | N200 : S40 | ND | 5.80  | 34.89  | 7.33  | ND   | 19.06 |
| 2 | N100 : S0  | ND | ND    | 38.06  | 7.12  | ND   | 18.43 |
| 2 | N100 : S15 | ND | ND    | 21.10  | 5.89  | ND   | 16.71 |
| 1 | NO : S0    | ND | ND    | 48.26  | 13.11 | ND   | 16.83 |
| 1 | NO : S15   | ND | ND    | 41.64  | 12.88 | ND   | 16.15 |
| 1 | NO : S40   | ND | ND    | 39.32  | 13.19 | ND   | 16.24 |
| 1 | N100 : S0  | ND | ND    | 36.84  | 11.92 | ND   | 16.45 |
| 1 | N100 : S15 | *  | *     | *      | *     | *    | *     |
| 1 | N100 : S40 | ND | ND    | 16.82  | 7.29  | ND   | 14.46 |
| 1 | N200 : S0  | ND | ND    | 49.48  | 12.44 | ND   | 17.14 |
| 1 | N200 : S15 | ND | ND    | 56.62  | 12.94 | ND   | 19.95 |
| 1 | N200 : S40 | ND | ND    | 62.25  | 16.08 | ND   | 20.06 |
| 2 | NO : S0    | ND | ND    | 38.80  | 12.67 | ND   | 17.62 |
| 2 | NO : S15   | ND | ND    | 39.18  | 13.66 | ND   | 18.92 |
| 2 | NO : S40   | ND | ND    | 53.28  | 13.62 | ND   | 16.46 |

|   |            |      |    |        |       |      |       |
|---|------------|------|----|--------|-------|------|-------|
| 2 | N100 : S0  | ND   | ND | 55.66  | 15.41 | ND   | 19.72 |
| 2 | N100 : S15 | ND   | ND | 64.28  | 14.47 | ND   | 17.56 |
| 2 | N100 : S40 | ND   | ND | 65.27  | 17.24 | ND   | 21.29 |
| 2 | N200 : S0  | ND   | ND | 74.15  | 14.76 | ND   | 15.78 |
| 2 | N200 : S15 | ND   | ND | 80.25  | 15.97 | ND   | 16.91 |
| 2 | N200 : S40 | ND   | ND | 80.31  | 13.41 | ND   | 18.32 |
| 3 | NO : S0    | ND   | ND | 49.66  | 11.32 | ND   | 18.21 |
| 3 | NO : S15   | ND   | ND | 50.07  | 14.09 | ND   | 19.80 |
| 3 | NO : S40   | ND   | ND | 51.81  | 14.37 | ND   | 22.37 |
| 3 | N100 : S0  | ND   | ND | 76.71  | 14.25 | ND   | 19.44 |
| 3 | N100 : S15 | ND   | ND | 59.90  | 13.61 | ND   | 19.42 |
| 3 | N100 : S40 | ND   | ND | 68.51  | 17.40 | ND   | 20.20 |
| 3 | N200 : S0  | ND   | ND | 81.64  | 17.24 | ND   | 22.79 |
| 3 | N200 : S15 | ND   | ND | 87.01  | 14.64 | ND   | 18.18 |
| 3 | N200 : S40 | ND   | ND | 82.84  | 15.72 | ND   | 16.69 |
| 1 | NO : S0    | ND   | ND | 65.41  | 12.66 | ND   | 20.50 |
| 1 | NO : S15   | ND   | ND | 63.08  | 12.43 | ND   | 22.13 |
| 1 | NO : S40   | ND   | ND | 62.05  | 15.05 | ND   | 23.80 |
| 1 | N100 : S0  | ND   | ND | 67.46  | 13.51 | ND   | 17.91 |
| 1 | N100 : S15 | ND   | ND | 77.78  | 15.74 | ND   | 20.99 |
| 1 | N100 : S40 | ND   | ND | 76.79  | 14.45 | ND   | 19.75 |
| 1 | N200 : S0  | 3.94 | ND | 90.63  | 14.85 | ND   | 20.91 |
| 1 | N200 : S15 | 6.06 | ND | 116.65 | 18.41 | 4.27 | 23.94 |
| 1 | N200 : S40 | 4.37 | ND | 84.94  | 15.69 | ND   | 23.95 |
| 2 | NO : S0    | ND   | ND | 86.20  | 14.03 | ND   | 24.75 |
| 2 | NO : S15   | ND   | ND | 64.66  | 16.03 | ND   | 25.40 |
| 2 | NO : S40   | ND   | ND | 75.31  | 12.40 | ND   | 20.01 |
| 2 | N100 : S0  | ND   | ND | 54.37  | 15.15 | ND   | 20.56 |
| 2 | N100 : S15 | ND   | ND | 80.51  | 13.88 | ND   | 20.13 |
| 2 | N100 : S40 | ND   | ND | 81.67  | 16.09 | ND   | 22.01 |
| 2 | N200 : S0  | ND   | ND | 106.69 | 14.87 | ND   | 21.96 |
| 2 | N200 : S15 | ND   | ND | 80.71  | 14.27 | ND   | 17.47 |
| 2 | N200 : S40 | ND   | ND | 116.72 | 14.70 | ND   | 21.17 |
| 3 | NO : S0    | ND   | ND | 46.04  | 12.84 | ND   | 19.30 |
| 3 | NO : S15   | ND   | ND | 58.10  | 13.58 | ND   | 20.06 |
| 3 | NO : S40   | ND   | ND | 56.91  | 12.28 | ND   | 19.01 |
| 3 | N100 : S0  | ND   | ND | 64.52  | 11.20 | ND   | 16.32 |
| 3 | N100 : S15 | ND   | ND | 81.23  | 14.98 | ND   | 21.44 |
| 3 | N100 : S40 | ND   | ND | 81.94  | 13.65 | ND   | 20.49 |
| 3 | N200 : S0  | ND   | ND | 126.18 | 18.15 | ND   | 26.70 |
| 3 | N200 : S15 | ND   | ND | 103.44 | 12.59 | ND   | 17.24 |
| 3 | N200 : S40 | ND   | ND | 91.45  | 14.42 | ND   | 22.31 |
| 1 | NO : S0    | ND   | ND | 33.85  | 9.95  | ND   | 23.22 |
| 1 | NO : S15   | ND   | ND | 31.07  | 9.98  | ND   | 20.63 |
| 1 | NO : S40   | ND   | ND | 25.63  | 8.36  | ND   | 21.98 |
| 1 | N100 : S0  | ND   | ND | 31.06  | 10.27 | ND   | 23.04 |
| 1 | N100 : S15 | ND   | ND | 28.63  | 8.47  | ND   | 18.52 |
| 1 | N100 : S40 | ND   | ND | 44.97  | 10.74 | ND   | 22.34 |
| 1 | N200 : S0  | ND   | ND | 80.85  | 16.63 | ND   | 31.70 |
| 1 | N200 : S15 | ND   | ND | 59.99  | 11.12 | ND   | 21.04 |

|   |            |      |       |        |       |      |       |
|---|------------|------|-------|--------|-------|------|-------|
| 1 | N200 : S40 | ND   | ND    | 79.29  | 13.93 | ND   | 26.79 |
| 2 | NO : S0    | ND   | ND    | 22.21  | 9.01  | ND   | 20.11 |
| 2 | NO : S15   | ND   | ND    | 24.04  | 9.61  | ND   | 22.81 |
| 2 | NO : S40   | ND   | ND    | 20.78  | 9.06  | ND   | 20.07 |
| 2 | N100 : S0  | ND   | ND    | 43.80  | 9.29  | ND   | 20.91 |
| 2 | N100 : S15 | ND   | ND    | 68.24  | 16.37 | ND   | 28.58 |
| 2 | N100 : S40 | ND   | ND    | 49.77  | 14.34 | ND   | 25.49 |
| 2 | N200 : S0  | ND   | ND    | 52.45  | 9.84  | ND   | 19.46 |
| 2 | N200 : S15 | ND   | ND    | 87.28  | 11.82 | ND   | 24.48 |
| 2 | N200 : S40 | ND   | ND    | 44.60  | 10.61 | ND   | 21.05 |
| 3 | NO : S0    | ND   | ND    | 18.25  | 6.93  | ND   | 17.93 |
| 3 | NO : S15   | ND   | ND    | 38.90  | 8.79  | ND   | 20.31 |
| 3 | NO : S40   | ND   | ND    | 20.11  | 6.62  | ND   | 16.97 |
| 3 | N100 : S0  | ND   | ND    | 35.29  | 6.50  | ND   | 17.19 |
| 3 | N100 : S15 | ND   | ND    | 22.73  | 6.62  | ND   | 17.34 |
| 3 | N100 : S40 | ND   | ND    | 44.50  | 7.65  | ND   | 18.32 |
| 3 | N200 : S0  | ND   | ND    | 60.91  | 7.75  | ND   | 18.60 |
| 3 | N200 : S15 | ND   | ND    | 48.44  | 6.89  | ND   | 17.34 |
| 3 | N200 : S40 | ND   | 7.12  | 55.81  | 8.75  | ND   | 18.99 |
| 1 | NO : S0    | ND   | ND    | 40.29  | 15.84 | ND   | 24.94 |
| 1 | NO : S15   | ND   | ND    | 47.43  | 12.72 | ND   | 22.65 |
| 1 | NO : S40   | 5.52 | 4.86  | 64.24  | 16.55 | ND   | 24.53 |
| 1 | N100 : S0  | ND   | ND    | 49.21  | 14.96 | ND   | 20.38 |
| 1 | N100 : S15 | 7.05 | 8.94  | 90.20  | 22.36 | ND   | 26.59 |
| 1 | N100 : S40 | 5.26 | ND    | 55.30  | 17.64 | ND   | 22.86 |
| 1 | N200 : S0  | 4.86 | 6.70  | 65.01  | 18.24 | ND   | 23.93 |
| 1 | N200 : S15 | 5.67 | 16.17 | 88.13  | 17.12 | ND   | 21.62 |
| 1 | N200 : S40 | 5.96 | 7.71  | 79.97  | 21.22 | 4.41 | 26.78 |
| 2 | NO : S0    | 4.71 | ND    | 48.92  | 13.21 | ND   | 25.77 |
| 2 | NO : S15   | ND   | ND    | 47.64  | 13.28 | ND   | 25.71 |
| 2 | NO : S40   | 6.15 | 6.78  | 74.12  | 18.79 | ND   | 25.65 |
| 2 | N100 : S0  | 5.34 | ND    | 61.69  | 18.09 | ND   | 26.34 |
| 2 | N100 : S15 | 5.96 | 13.11 | 85.68  | 22.47 | ND   | 28.90 |
| 2 | N100 : S40 | 7.04 | 12.87 | 84.54  | 23.97 | ND   | 26.12 |
| 2 | N200 : S0  | ND   | ND    | 44.63  | 13.01 | ND   | 18.86 |
| 2 | N200 : S15 | 4.97 | 18.70 | 75.06  | 16.26 | ND   | 23.39 |
| 2 | N200 : S40 | 6.62 | 6.28  | 62.90  | 18.53 | ND   | 23.32 |
| 3 | NO : S0    | 5.71 | 5.03  | 51.23  | 19.72 | ND   | 26.03 |
| 3 | NO : S15   | 5.73 | 9.38  | 53.68  | 18.57 | ND   | 23.38 |
| 3 | NO : S40   | 5.77 | 6.83  | 52.84  | 18.46 | ND   | 25.70 |
| 3 | N100 : S0  | 7.17 | 24.39 | 103.11 | 21.96 | ND   | 25.32 |
| 3 | N100 : S15 | 6.32 | 12.51 | 72.33  | 19.06 | ND   | 23.51 |
| 3 | N100 : S40 | 5.10 | 10.33 | 60.91  | 17.90 | ND   | 26.10 |
| 3 | N200 : S0  | 6.13 | 17.07 | 71.25  | 21.16 | ND   | 24.99 |
| 3 | N200 : S15 | *    | *     | *      | *     | *    | *     |
| 3 | N200 : S40 | 5.94 | 11.59 | 74.94  | 17.34 | ND   | 21.17 |
| 1 | NO : S0    | ND   | ND    | 58.50  | 14.08 | ND   | 16.81 |
| 1 | NO : S15   | ND   | ND    | 31.46  | 8.01  | ND   | 9.31  |
| 1 | NO : S40   | ND   | ND    | 42.00  | 12.27 | ND   | 15.56 |
| 1 | N100 : S0  | 4.77 | ND    | 75.71  | 15.18 | ND   | 13.83 |

|   |            |      |      |        |       |      |       |
|---|------------|------|------|--------|-------|------|-------|
| 1 | N100 : S15 | 4.87 | 7.20 | 88.48  | 16.34 | ND   | 15.48 |
| 1 | N100 : S40 | 6.24 | 5.63 | 97.75  | 19.08 | ND   | 19.26 |
| 1 | N200 : S0  | 6.14 | 5.06 | 118.88 | 17.06 | 5.86 | 15.71 |
| 1 | N200 : S15 | ND   | ND   | 61.26  | 13.65 | ND   | 15.18 |
| 1 | N200 : S40 | 5.68 | ND   | 87.49  | 17.57 | ND   | 17.17 |
| 2 | NO : S0    | 5.30 | ND   | 72.74  | 14.90 | ND   | 19.88 |
| 2 | NO : S15   | ND   | ND   | 50.51  | 12.68 | ND   | 15.24 |
| 2 | NO : S40   | ND   | ND   | 71.04  | 15.61 | ND   | 16.35 |
| 2 | N100 : S0  | 5.06 | ND   | 78.94  | 16.66 | ND   | 16.25 |
| 2 | N100 : S15 | 5.16 | ND   | 91.09  | 16.21 | 4.66 | 16.85 |
| 2 | N100 : S40 | 4.68 | ND   | 70.79  | 14.42 | ND   | 16.17 |
| 2 | N200 : S0  | 5.94 | 4.80 | 95.40  | 15.64 | 4.67 | 16.48 |
| 2 | N200 : S15 | 5.21 | 4.47 | 100.50 | 16.66 | ND   | 16.81 |
| 2 | N200 : S40 | 6.12 | 6.01 | 115.00 | 16.92 | 5.28 | 16.79 |
| 3 | NO : S0    | 5.41 | ND   | 72.43  | 20.87 | 4.20 | 23.63 |
| 3 | NO : S15   | 4.94 | ND   | 53.32  | 14.44 | ND   | 14.88 |
| 3 | NO : S40   | 4.35 | ND   | 57.15  | 15.80 | ND   | 17.57 |
| 3 | N100 : S0  | 8.66 | 7.10 | 54.05  | 19.12 | 4.78 | 24.00 |
| 3 | N100 : S15 | 4.33 | ND   | 62.66  | 13.49 | ND   | 14.74 |
| 3 | N100 : S40 | 5.29 | ND   | 85.11  | 16.99 | 4.54 | 17.97 |
| 3 | N200 : S0  | 7.72 | 7.83 | 125.25 | 21.92 | 6.09 | 21.07 |
| 3 | N200 : S15 | 5.27 | ND   | 77.17  | 16.21 | 4.33 | 16.21 |
| 3 | N200 : S40 | 9.45 | 5.55 | 147.40 | 25.14 | 7.87 | 25.34 |
| 1 | NO : S0    | ND   | 4.33 | 40.63  | 11.79 | ND   | 21.35 |
| 1 | NO : S15   | 5.99 | 4.67 | 43.85  | 14.66 | ND   | 24.36 |
| 1 | NO : S40   | 4.99 | ND   | 41.03  | 12.50 | ND   | 20.11 |
| 1 | N100 : S0  | 6.26 | 6.17 | 36.89  | 14.86 | ND   | 23.07 |
| 1 | N100 : S15 | 8.12 | 5.07 | 49.44  | 15.44 | ND   | 25.11 |
| 1 | N100 : S40 | 8.60 | ND   | 40.03  | 13.95 | ND   | 22.36 |
| 1 | N200 : S0  | 5.49 | 4.93 | 40.12  | 11.90 | ND   | 17.40 |
| 1 | N200 : S15 | 7.41 | 6.49 | 57.45  | 16.10 | ND   | 25.36 |
| 1 | N200 : S40 | 9.28 | 7.18 | 62.38  | 19.74 | ND   | 22.09 |
| 2 | NO : S0    | 4.93 | ND   | 34.11  | 11.90 | ND   | 21.57 |
| 2 | NO : S15   | 6.01 | ND   | 42.23  | 14.98 | ND   | 24.07 |
| 2 | NO : S40   | 5.94 | ND   | 44.28  | 15.32 | ND   | 25.87 |
| 2 | N100 : S0  | 6.71 | ND   | 43.35  | 18.12 | ND   | 27.73 |
| 2 | N100 : S15 | 6.19 | ND   | 43.24  | 17.13 | ND   | 24.69 |
| 2 | N100 : S40 | 5.91 | 5.55 | 47.56  | 17.29 | ND   | 24.44 |
| 2 | N200 : S0  | 6.70 | ND   | 42.52  | 13.64 | ND   | 19.48 |
| 2 | N200 : S15 | 6.59 | 4.89 | 42.89  | 12.76 | ND   | 21.96 |
| 2 | N200 : S40 | 8.78 | 5.57 | 59.81  | 17.61 | ND   | 26.25 |
| 3 | NO : S0    | 4.76 | ND   | 39.26  | 18.53 | ND   | 17.18 |
| 3 | NO : S15   | 5.62 | ND   | 33.01  | 20.90 | ND   | 17.09 |
| 3 | NO : S40   | ND   | ND   | 38.47  | 19.28 | ND   | 17.90 |
| 3 | N100 : S0  | 7.48 | ND   | 119.64 | 25.54 | 5.81 | 19.37 |
| 3 | N100 : S15 | 7.49 | 9.72 | 65.60  | 27.08 | ND   | 24.09 |
| 3 | N100 : S40 | 9.90 | 8.39 | 62.55  | 29.51 | ND   | 25.92 |
| 3 | N200 : S0  | 6.09 | 8.90 | 43.63  | 19.21 | ND   | 17.52 |
| 3 | N200 : S15 | 7.88 | ND   | 46.33  | 18.19 | ND   | 16.87 |
| 3 | N200 : S40 | 9.45 | 9.49 | 52.15  | 22.59 | ND   | 22.96 |

|   |            |      |      |       |       |      |       |
|---|------------|------|------|-------|-------|------|-------|
| 1 | NO : S0    | ND   | ND   | 41.16 | 9.11  | ND   | 25.35 |
| 1 | NO : S15   | ND   | ND   | 51.57 | 10.49 | ND   | 26.88 |
| 1 | NO : S40   | ND   | ND   | 35.56 | 7.91  | ND   | 24.08 |
| 1 | N100 : S0  | ND   | ND   | 31.66 | 7.42  | ND   | 29.17 |
| 1 | N100 : S15 | ND   | ND   | 42.82 | 6.48  | ND   | 27.62 |
| 1 | N100 : S40 | ND   | ND   | 37.87 | 9.66  | ND   | 21.95 |
| 1 | N200 : S0  | ND   | ND   | 39.56 | 11.25 | ND   | 22.31 |
| 1 | N200 : S15 | 5.81 | ND   | 48.21 | 13.60 | 4.29 | 27.12 |
| 1 | N200 : S40 | ND   | ND   | 57.47 | 9.14  | ND   | 25.84 |
| 2 | NO : S0    | ND   | ND   | 37.45 | 8.38  | ND   | 27.08 |
| 2 | NO : S15   | ND   | ND   | 35.37 | 9.27  | ND   | 28.84 |
| 2 | NO : S40   | *    | *    | *     | *     | *    | *     |
| 2 | N100 : S0  | ND   | ND   | 44.38 | 13.32 | ND   | 24.67 |
| 2 | N100 : S15 | ND   | ND   | 47.52 | 8.18  | ND   | 30.63 |
| 2 | N100 : S40 | ND   | ND   | 38.89 | 9.72  | ND   | 27.26 |
| 2 | N200 : S0  | 4.12 | ND   | 54.11 | 11.65 | ND   | 23.16 |
| 2 | N200 : S15 | ND   | ND   | 41.03 | 9.12  | ND   | 24.72 |
| 2 | N200 : S40 | ND   | 4.24 | 46.97 | 6.19  | ND   | 25.52 |
| 3 | NO : S0    | ND   | ND   | 30.86 | 10.39 | ND   | 26.08 |
| 3 | NO : S15   | ND   | ND   | 31.18 | 12.00 | ND   | 27.50 |
| 3 | NO : S40   | ND   | ND   | 33.90 | 10.01 | ND   | 25.58 |
| 3 | N100 : S0  | ND   | ND   | 46.83 | 10.38 | ND   | 27.64 |
| 3 | N100 : S15 | ND   | ND   | 33.63 | 12.34 | ND   | 23.18 |
| 3 | N100 : S40 | ND   | ND   | 37.35 | 7.96  | ND   | 24.67 |
| 3 | N200 : S0  | ND   | 6.03 | 65.74 | 14.65 | ND   | 25.08 |
| 3 | N200 : S15 | 4.57 | 4.53 | 61.34 | 13.30 | ND   | 23.44 |
| 3 | N200 : S40 | *    | *    | *     | *     | *    | *     |
| 1 | NO : S0    | ND   | ND   | 33.67 | 8.88  | ND   | 29.08 |
| 1 | NO : S15   | ND   | ND   | 32.43 | 9.14  | ND   | 22.83 |
| 1 | NO : S40   | ND   | ND   | 36.29 | 8.43  | ND   | 23.60 |
| 1 | N100 : S0  | ND   | ND   | 38.91 | 7.83  | ND   | 25.10 |
| 1 | N100 : S15 | ND   | 4.86 | 43.80 | 8.36  | ND   | 25.77 |
| 1 | N100 : S40 | ND   | ND   | 34.74 | 8.99  | ND   | 26.34 |
| 1 | N200 : S0  | ND   | ND   | 45.57 | 10.46 | ND   | 26.02 |
| 1 | N200 : S15 | ND   | ND   | 51.05 | 7.51  | ND   | 27.61 |
| 1 | N200 : S40 | ND   | 4.04 | 36.07 | 11.18 | ND   | 21.31 |
| 2 | NO : S0    | ND   | ND   | 29.80 | 5.54  | ND   | 21.80 |
| 2 | NO : S15   | ND   | ND   | 31.42 | 8.38  | ND   | 24.15 |
| 2 | NO : S40   | ND   | ND   | 37.48 | 6.95  | ND   | 24.43 |
| 2 | N100 : S0  | ND   | ND   | 34.77 | 8.56  | ND   | 22.53 |
| 2 | N100 : S15 | ND   | ND   | 39.89 | 5.79  | ND   | 25.74 |
| 2 | N100 : S40 | ND   | ND   | 38.62 | 12.05 | ND   | 24.90 |
| 2 | N200 : S0  | ND   | 5.35 | 46.03 | 10.72 | ND   | 22.59 |
| 2 | N200 : S15 | ND   | 4.55 | 48.99 | 9.94  | ND   | 23.28 |
| 2 | N200 : S40 | ND   | ND   | 45.93 | 8.22  | ND   | 25.53 |
| 3 | NO : S0    | ND   | ND   | 28.92 | 9.03  | ND   | 20.07 |
| 3 | NO : S15   | ND   | ND   | 32.70 | 12.85 | ND   | 22.79 |
| 3 | NO : S40   | ND   | ND   | 33.52 | 10.33 | ND   | 26.25 |
| 3 | N100 : S0  | ND   | ND   | 43.73 | 10.50 | ND   | 25.32 |
| 3 | N100 : S15 | 4.32 | ND   | 37.55 | 14.01 | ND   | 21.66 |

|   |            |    |      |       |       |    |       |
|---|------------|----|------|-------|-------|----|-------|
| 3 | N100 : S40 | ND | ND   | 36.17 | 14.30 | ND | 23.09 |
| 3 | N200 : S0  | ND | ND   | 35.77 | 14.87 | ND | 21.72 |
| 3 | N200 : S15 | ND | 7.33 | 45.85 | 14.09 | ND | 23.13 |
| 3 | N200 : S40 | ND | 4.60 | 40.14 | 13.33 | ND | 19.68 |

| Rep | Treatment (kg/Ha) | Phenylalanine mmol/kg DW | Glutamine mmol/kg DW | Lysine mmol/kg DW | Histidine mmol/kg DW | Tyrosine mmol/kg DW | Typtophan mmol/kg DW |
|-----|-------------------|--------------------------|----------------------|-------------------|----------------------|---------------------|----------------------|
| 1   | N0 : S0           | ND                       | 23.87                | ND                | ND                   | ND                  | ND                   |
| 1   | N0 : S15          | ND                       | 18.98                | ND                | ND                   | ND                  | ND                   |
| 1   | N0 : S40          | *                        | *                    | *                 | *                    | *                   | *                    |
| 1   | N100 : S0         | ND                       | 33.84                | ND                | ND                   | ND                  | ND                   |
| 1   | N100 : S15        | ND                       | 41.93                | ND                | ND                   | ND                  | ND                   |
| 1   | N100 : S40        | ND                       | 51.80                | ND                | 4.82                 | ND                  | ND                   |
| 1   | N200 : S0         | ND                       | 54.69                | ND                | ND                   | ND                  | ND                   |
| 1   | N200 : S15        | ND                       | 20.90                | ND                | ND                   | ND                  | ND                   |
| 1   | N200 : S40        | ND                       | 22.07                | ND                | ND                   | ND                  | ND                   |
| 2   | N0 : S0           | ND                       | 11.05                | ND                | ND                   | ND                  | ND                   |
| 2   | N0 : S15          | ND                       | 6.95                 | ND                | ND                   | ND                  | ND                   |
| 2   | N0 : S40          | ND                       | 6.94                 | ND                | ND                   | ND                  | ND                   |
| 2   | N100 : S0         | ND                       | 13.35                | ND                | ND                   | ND                  | ND                   |
| 2   | N100 : S15        | ND                       | 10.29                | ND                | ND                   | ND                  | ND                   |
| 2   | N100 : S40        | ND                       | 13.84                | ND                | ND                   | ND                  | ND                   |
| 2   | N200 : S0         | ND                       | 19.48                | ND                | ND                   | ND                  | ND                   |
| 2   | N200 : S15        | ND                       | 27.73                | ND                | ND                   | ND                  | ND                   |
| 2   | N200 : S40        | ND                       | 22.42                | ND                | ND                   | ND                  | ND                   |
| 3   | N0 : S0           | ND                       | 9.36                 | ND                | ND                   | ND                  | ND                   |
| 3   | N0 : S15          | ND                       | 6.05                 | ND                | ND                   | ND                  | ND                   |
| 3   | N0 : S40          | ND                       | 5.67                 | ND                | ND                   | ND                  | ND                   |
| 3   | N100 : S0         | ND                       | 18.28                | ND                | ND                   | ND                  | ND                   |
| 3   | N100 : S15        | ND                       | 17.25                | ND                | ND                   | ND                  | ND                   |
| 3   | N100 : S40        | ND                       | 16.28                | ND                | ND                   | ND                  | ND                   |
| 3   | N200 : S0         | ND                       | 21.31                | ND                | ND                   | ND                  | ND                   |
| 3   | N200 : S15        | ND                       | 23.80                | ND                | ND                   | ND                  | ND                   |
| 3   | N200 : S40        | ND                       | 21.37                | ND                | ND                   | ND                  | ND                   |
| 1   | N0 : S0           | ND                       | 8.28                 | ND                | ND                   | ND                  | ND                   |
| 1   | N0 : S15          | ND                       | 12.82                | ND                | ND                   | ND                  | ND                   |
| 1   | N0 : S40          | *                        | *                    | *                 | *                    | *                   | *                    |
| 1   | N100 : S0         | ND                       | 11.65                | ND                | ND                   | ND                  | ND                   |
| 1   | N100 : S15        | ND                       | 13.35                | ND                | ND                   | ND                  | ND                   |
| 1   | N100 : S40        | ND                       | 11.31                | ND                | ND                   | ND                  | ND                   |
| 1   | N200 : S0         | ND                       | 14.17                | ND                | ND                   | ND                  | ND                   |
| 1   | N200 : S15        | ND                       | 20.43                | ND                | ND                   | ND                  | ND                   |
| 1   | N200 : S40        | ND                       | 14.79                | ND                | ND                   | ND                  | ND                   |
| 2   | N0 : S0           | ND                       | 5.94                 | ND                | ND                   | ND                  | ND                   |
| 2   | N0 : S15          | ND                       | 8.94                 | ND                | ND                   | ND                  | ND                   |
| 2   | N0 : S40          | ND                       | 7.07                 | ND                | ND                   | ND                  | ND                   |
| 2   | N100 : S0         | ND                       | 13.05                | ND                | ND                   | ND                  | ND                   |
| 2   | N100 : S15        | ND                       | 19.64                | ND                | ND                   | ND                  | ND                   |
| 2   | N100 : S40        | ND                       | 14.36                | ND                | ND                   | ND                  | ND                   |
| 2   | N200 : S0         | ND                       | 15.03                | ND                | ND                   | ND                  | ND                   |
| 2   | N200 : S15        | ND                       | 16.87                | ND                | ND                   | ND                  | ND                   |
| 2   | N200 : S40        | ND                       | 9.36                 | ND                | ND                   | ND                  | ND                   |
| 3   | N0 : S0           | ND                       | 8.89                 | ND                | ND                   | ND                  | ND                   |
| 3   | N0 : S15          | ND                       | 17.88                | ND                | ND                   | ND                  | ND                   |



|   |            |      |       |    |    |    |    |
|---|------------|------|-------|----|----|----|----|
| 3 | N0 : S40   | ND   | 11.00 | ND | ND | ND | ND |
| 3 | N100 : S0  | ND   | 12.21 | ND | ND | ND | ND |
| 3 | N100 : S15 | ND   | 10.76 | ND | ND | ND | ND |
| 3 | N100 : S40 | ND   | 19.32 | ND | ND | ND | ND |
| 3 | N200 : S0  | ND   | 18.05 | ND | ND | ND | ND |
| 3 | N200 : S15 | ND   | 14.37 | ND | ND | ND | ND |
| 3 | N200 : S40 | ND   | 7.67  | ND | ND | ND | ND |
| 1 | N0 : S0    | ND   | 7.80  | ND | ND | ND | ND |
| 1 | N0 : S15   | ND   | 5.47  | ND | ND | ND | ND |
| 1 | N0 : S40   | *    | *     | *  | *  | *  | *  |
| 1 | N100 : S0  | ND   | 24.70 | ND | ND | ND | ND |
| 1 | N100 : S15 | ND   | 16.53 | ND | ND | ND | ND |
| 1 | N100 : S40 | ND   | 22.51 | ND | ND | ND | ND |
| 1 | N200 : S0  | ND   | 42.68 | ND | ND | ND | ND |
| 1 | N200 : S15 | ND   | 37.74 | ND | ND | ND | ND |
| 1 | N200 : S40 | ND   | 22.68 | ND | ND | ND | ND |
| 2 | N0 : S0    | ND   | 14.67 | ND | ND | ND | ND |
| 2 | N0 : S15   | ND   | 7.09  | ND | ND | ND | ND |
| 2 | N0 : S40   | ND   | 14.74 | ND | ND | ND | ND |
| 2 | N100 : S0  | ND   | 22.09 | ND | ND | ND | ND |
| 2 | N100 : S15 | ND   | 17.13 | ND | ND | ND | ND |
| 2 | N100 : S40 | ND   | 22.55 | ND | ND | ND | ND |
| 2 | N200 : S0  | ND   | 38.19 | ND | ND | ND | ND |
| 2 | N200 : S15 | ND   | 34.49 | ND | ND | ND | ND |
| 2 | N200 : S40 | ND   | 24.14 | ND | ND | ND | ND |
| 3 | N0 : S0    | ND   | 41.62 | ND | ND | ND | ND |
| 3 | N0 : S15   | ND   | 14.81 | ND | ND | ND | ND |
| 3 | N0 : S40   | ND   | 19.17 | ND | ND | ND | ND |
| 3 | N100 : S0  | ND   | 17.87 | ND | ND | ND | ND |
| 3 | N100 : S15 | ND   | 40.07 | ND | ND | ND | ND |
| 3 | N100 : S40 | ND   | 33.86 | ND | ND | ND | ND |
| 3 | N200 : S0  | ND   | 28.92 | ND | ND | ND | ND |
| 3 | N200 : S15 | ND   | 39.43 | ND | ND | ND | ND |
| 3 | N200 : S40 | ND   | 37.34 | ND | ND | ND | ND |
| 1 | N0 : S0    | ND   | 40.77 | ND | ND | ND | ND |
| 1 | N0 : S15   | ND   | 17.00 | ND | ND | ND | ND |
| 1 | N0 : S40   | ND   | 20.36 | ND | ND | ND | ND |
| 1 | N100 : S0  | ND   | 27.92 | ND | ND | ND | ND |
| 1 | N100 : S15 | ND   | 27.14 | ND | ND | ND | ND |
| 1 | N100 : S40 | 4.82 | 30.10 | ND | ND | ND | ND |
| 1 | N200 : S0  | 5.47 | 38.78 | ND | ND | ND | ND |
| 1 | N200 : S15 | 4.58 | 38.99 | ND | ND | ND | ND |
| 1 | N200 : S40 | 5.09 | 40.45 | ND | ND | ND | ND |
| 2 | N0 : S0    | ND   | 16.04 | ND | ND | ND | ND |
| 2 | N0 : S15   | ND   | 15.68 | ND | ND | ND | ND |
| 2 | N0 : S40   | ND   | 17.60 | ND | ND | ND | ND |
| 2 | N100 : S0  | ND   | 21.05 | ND | ND | ND | ND |
| 2 | N100 : S15 | ND   | 23.63 | ND | ND | ND | ND |
| 2 | N100 : S40 | ND   | 24.71 | ND | ND | ND | ND |
| 2 | N200 : S0  | ND   | 29.50 | ND | ND | ND | ND |

|   |            |      |       |      |    |    |    |
|---|------------|------|-------|------|----|----|----|
| 2 | N200 : S15 | 5.26 | 50.61 | ND   | ND | ND | ND |
| 2 | N200 : S40 | 5.10 | 48.23 | ND   | ND | ND | ND |
| 3 | NO : S15   | ND   | 18.50 | ND   | ND | ND | ND |
| 3 | NO : S40   | ND   | 29.77 | ND   | ND | ND | ND |
| 3 | N100 : S0  | ND   | 24.58 | ND   | ND | ND | ND |
| 3 | N100 : S15 | ND   | 43.92 | ND   | ND | ND | ND |
| 3 | N100 : S40 | ND   | 22.64 | ND   | ND | ND | ND |
| 3 | N200 : S0  | ND   | 30.93 | ND   | ND | ND | ND |
| 3 | N200 : S15 | ND   | 28.24 | ND   | ND | ND | ND |
| 3 | N200 : S40 | ND   | 35.98 | ND   | ND | ND | ND |
| 3 | NO : S0    | ND   | 15.94 | ND   | ND | ND | ND |
| 1 | NO : S0    | ND   | 4.71  | ND   | ND | ND | ND |
| 1 | NO : S15   | ND   | ND    | ND   | ND | ND | ND |
| 1 | NO : S40   | ND   | 4.88  | ND   | ND | ND | ND |
| 1 | N100 : S0  | ND   | 12.76 | ND   | ND | ND | ND |
| 1 | N100 : S15 | ND   | 12.09 | ND   | ND | ND | ND |
| 1 | N100 : S40 | 4.78 | 15.55 | 4.48 | ND | ND | ND |
| 1 | N200 : S0  | ND   | 11.92 | ND   | ND | ND | ND |
| 1 | N200 : S15 | ND   | 10.18 | ND   | ND | ND | ND |
| 1 | N200 : S40 | ND   | 15.88 | 3.57 | ND | ND | ND |
| 2 | NO : S0    | ND   | 4.31  | ND   | ND | ND | ND |
| 2 | NO : S15   | ND   | 4.69  | ND   | ND | ND | ND |
| 2 | NO : S40   | ND   | 4.73  | ND   | ND | ND | ND |
| 2 | N100 : S40 | *    | *     | *    | *  | *  | *  |
| 2 | N200 : S0  | ND   | 6.03  | ND   | ND | ND | ND |
| 2 | N200 : S15 | ND   | 13.56 | ND   | ND | ND | ND |
| 2 | N200 : S40 | ND   | 9.96  | ND   | ND | ND | ND |
| 3 | NO : S0    | ND   | 8.06  | ND   | ND | ND | ND |
| 3 | NO : S15   | ND   | 4.38  | ND   | ND | ND | ND |
| 3 | NO : S40   | ND   | ND    | ND   | ND | ND | ND |
| 3 | N100 : S0  | ND   | 9.50  | ND   | ND | ND | ND |
| 3 | N100 : S15 | ND   | 6.69  | ND   | ND | ND | ND |
| 3 | N100 : S40 | ND   | 8.03  | ND   | ND | ND | ND |
| 3 | N200 : S0  | ND   | 8.75  | ND   | ND | ND | ND |
| 3 | N200 : S15 | ND   | 11.20 | ND   | ND | ND | ND |
| 3 | N200 : S40 | ND   | 10.59 | ND   | ND | ND | ND |
| 2 | N100 : S0  | ND   | 10.30 | ND   | ND | ND | ND |
| 2 | N100 : S15 | ND   | 5.76  | ND   | ND | ND | ND |
| 1 | NO : S0    | ND   | 9.49  | ND   | ND | ND | ND |
| 1 | NO : S15   | ND   | 7.57  | ND   | ND | ND | ND |
| 1 | NO : S40   | ND   | 6.01  | ND   | ND | ND | ND |
| 1 | N100 : S0  | ND   | 6.12  | ND   | ND | ND | ND |
| 1 | N100 : S15 | *    | *     | *    | *  | *  | *  |
| 1 | N100 : S40 | ND   | 5.05  | ND   | ND | ND | ND |
| 1 | N200 : S0  | ND   | 10.27 | ND   | ND | ND | ND |
| 1 | N200 : S15 | ND   | 10.82 | ND   | ND | ND | ND |
| 1 | N200 : S40 | ND   | 14.10 | ND   | ND | ND | ND |
| 2 | NO : S0    | ND   | 9.22  | ND   | ND | ND | ND |
| 2 | NO : S15   | ND   | 7.50  | ND   | ND | ND | ND |
| 2 | NO : S40   | ND   | 11.43 | ND   | ND | ND | ND |

|   |            |      |       |       |    |      |    |
|---|------------|------|-------|-------|----|------|----|
| 2 | N100 : S0  | ND   | 11.55 | ND    | ND | ND   | ND |
| 2 | N100 : S15 | ND   | 12.67 | ND    | ND | ND   | ND |
| 2 | N100 : S40 | 4.25 | 15.85 | ND    | ND | ND   | ND |
| 2 | N200 : S0  | ND   | 15.92 | ND    | ND | ND   | ND |
| 2 | N200 : S15 | 4.75 | 17.94 | 4.56  | ND | ND   | ND |
| 2 | N200 : S40 | ND   | 19.80 | ND    | ND | ND   | ND |
| 3 | NO : S0    | ND   | 9.69  | ND    | ND | ND   | ND |
| 3 | NO : S15   | ND   | 10.97 | ND    | ND | ND   | ND |
| 3 | NO : S40   | ND   | 12.57 | ND    | ND | ND   | ND |
| 3 | N100 : S0  | ND   | 16.94 | ND    | ND | ND   | ND |
| 3 | N100 : S15 | ND   | 12.15 | ND    | ND | ND   | ND |
| 3 | N100 : S40 | ND   | 15.30 | ND    | ND | ND   | ND |
| 3 | N200 : S0  | ND   | 20.88 | ND    | ND | ND   | ND |
| 3 | N200 : S15 | ND   | 18.25 | ND    | ND | ND   | ND |
| 3 | N200 : S40 | ND   | 20.11 | ND    | ND | ND   | ND |
| 1 | NO : S0    | ND   | 21.51 | 5.35  | ND | ND   | ND |
| 1 | NO : S15   | ND   | 11.57 | 4.54  | ND | ND   | ND |
| 1 | NO : S40   | ND   | 14.14 | 5.30  | ND | ND   | ND |
| 1 | N100 : S0  | ND   | 14.34 | 5.68  | ND | ND   | ND |
| 1 | N100 : S15 | ND   | 14.97 | 5.64  | ND | ND   | ND |
| 1 | N100 : S40 | 4.47 | 18.96 | 6.52  | ND | ND   | ND |
| 1 | N200 : S0  | 5.10 | 24.11 | 7.04  | ND | 4.16 | ND |
| 1 | N200 : S15 | 6.92 | 49.98 | 12.51 | ND | 7.04 | ND |
| 1 | N200 : S40 | 4.95 | 29.52 | 8.89  | ND | 4.99 | ND |
| 2 | NO : S0    | ND   | 17.41 | 5.46  | ND | ND   | ND |
| 2 | NO : S15   | ND   | 15.99 | 5.81  | ND | ND   | ND |
| 2 | NO : S40   | 4.28 | 17.62 | 5.69  | ND | ND   | ND |
| 2 | N100 : S0  | ND   | 14.04 | ND    | ND | ND   | ND |
| 2 | N100 : S15 | ND   | 17.92 | 5.90  | ND | ND   | ND |
| 2 | N100 : S40 | ND   | 17.93 | 5.92  | ND | ND   | ND |
| 2 | N200 : S0  | 4.06 | 23.09 | 6.35  | ND | ND   | ND |
| 2 | N200 : S15 | ND   | 32.73 | 7.34  | ND | 4.28 | ND |
| 2 | N200 : S40 | 4.15 | 27.54 | 6.11  | ND | ND   | ND |
| 3 | NO : S0    | ND   | 9.50  | 4.37  | ND | ND   | ND |
| 3 | NO : S15   | ND   | 12.76 | 4.28  | ND | ND   | ND |
| 3 | NO : S40   | ND   | 9.55  | 3.99  | ND | ND   | ND |
| 3 | N100 : S0  | ND   | 15.29 | 4.95  | ND | ND   | ND |
| 3 | N100 : S15 | 4.13 | 21.04 | 5.77  | ND | 4.37 | ND |
| 3 | N100 : S40 | 4.14 | 24.92 | 5.72  | ND | ND   | ND |
| 3 | N200 : S0  | 4.80 | 35.38 | 8.03  | ND | ND   | ND |
| 3 | N200 : S15 | 4.31 | 24.31 | 6.84  | ND | 4.09 | ND |
| 3 | N200 : S40 | ND   | 25.01 | 5.85  | ND | ND   | ND |
| 1 | NO : S0    | ND   | 5.90  | ND    | ND | ND   | ND |
| 1 | NO : S15   | ND   | 6.31  | ND    | ND | ND   | ND |
| 1 | NO : S40   | ND   | 5.58  | ND    | ND | ND   | ND |
| 1 | N100 : S0  | ND   | 6.42  | ND    | ND | ND   | ND |
| 1 | N100 : S15 | ND   | 5.77  | ND    | ND | ND   | ND |
| 1 | N100 : S40 | ND   | 8.74  | ND    | ND | ND   | ND |
| 1 | N200 : S0  | ND   | 15.86 | ND    | ND | ND   | ND |
| 1 | N200 : S15 | ND   | 16.10 | ND    | ND | ND   | ND |

|   |            |      |       |      |    |    |    |
|---|------------|------|-------|------|----|----|----|
| 1 | N200 : S40 | ND   | 15.81 | ND   | ND | ND | ND |
| 2 | NO : S0    | ND   | 5.10  | ND   | ND | ND | ND |
| 2 | NO : S15   | ND   | 5.75  | ND   | ND | ND | ND |
| 2 | NO : S40   | ND   | 4.32  | ND   | ND | ND | ND |
| 2 | N100 : S0  | ND   | 9.58  | ND   | ND | ND | ND |
| 2 | N100 : S15 | ND   | 16.21 | ND   | ND | ND | ND |
| 2 | N100 : S40 | ND   | 10.79 | ND   | ND | ND | ND |
| 2 | N200 : S0  | ND   | 12.20 | ND   | ND | ND | ND |
| 2 | N200 : S15 | ND   | 22.77 | ND   | ND | ND | ND |
| 2 | N200 : S40 | ND   | 8.39  | ND   | ND | ND | ND |
| 3 | NO : S0    | ND   | 5.91  | ND   | ND | ND | ND |
| 3 | NO : S15   | ND   | 8.97  | ND   | ND | ND | ND |
| 3 | NO : S40   | ND   | 5.10  | ND   | ND | ND | ND |
| 3 | N100 : S0  | ND   | 7.67  | ND   | ND | ND | ND |
| 3 | N100 : S15 | ND   | 6.71  | ND   | ND | ND | ND |
| 3 | N100 : S40 | ND   | 10.05 | ND   | ND | ND | ND |
| 3 | N200 : S0  | ND   | 15.36 | ND   | ND | ND | ND |
| 3 | N200 : S15 | ND   | 11.18 | ND   | ND | ND | ND |
| 3 | N200 : S40 | ND   | 13.54 | ND   | ND | ND | ND |
| 1 | NO : S0    | ND   | 17.69 | 5.43 | ND | ND | ND |
| 1 | NO : S15   | ND   | 17.39 | 5.20 | ND | ND | ND |
| 1 | NO : S40   | ND   | 22.59 | 5.74 | ND | ND | ND |
| 1 | N100 : S0  | ND   | 21.33 | 5.06 | ND | ND | ND |
| 1 | N100 : S15 | 5.25 | 28.18 | 7.44 | ND | ND | ND |
| 1 | N100 : S40 | ND   | 19.73 | 5.27 | ND | ND | ND |
| 1 | N200 : S0  | ND   | 28.28 | 5.59 | ND | ND | ND |
| 1 | N200 : S15 | ND   | 41.03 | 6.21 | ND | ND | ND |
| 1 | N200 : S40 | ND   | 29.66 | 6.56 | ND | ND | ND |
| 2 | NO : S0    | ND   | 16.83 | 5.73 | ND | ND | ND |
| 2 | NO : S15   | ND   | 26.29 | 6.43 | ND | ND | ND |
| 2 | NO : S40   | 4.74 | 27.53 | 6.63 | ND | ND | ND |
| 2 | N100 : S0  | ND   | 24.27 | 5.70 | ND | ND | ND |
| 2 | N100 : S15 | ND   | 30.51 | 6.16 | ND | ND | ND |
| 2 | N100 : S40 | 5.18 | 38.12 | 6.26 | ND | ND | ND |
| 2 | N200 : S0  | ND   | 23.20 | 4.67 | ND | ND | ND |
| 2 | N200 : S15 | ND   | 31.65 | 5.38 | ND | ND | ND |
| 2 | N200 : S40 | 4.26 | 27.50 | 6.09 | ND | ND | ND |
| 3 | NO : S0    | ND   | 19.61 | 5.39 | ND | ND | ND |
| 3 | NO : S15   | ND   | 25.39 | 5.18 | ND | ND | ND |
| 3 | NO : S40   | ND   | 22.56 | 5.04 | ND | ND | ND |
| 3 | N100 : S0  | ND   | 31.51 | 7.41 | ND | ND | ND |
| 3 | N100 : S15 | ND   | 30.19 | 5.98 | ND | ND | ND |
| 3 | N100 : S40 | ND   | 24.46 | 5.25 | ND | ND | ND |
| 3 | N200 : S0  | 4.16 | 32.59 | 5.69 | ND | ND | ND |
| 3 | N200 : S15 | *    | *     | *    | *  | *  | *  |
| 3 | N200 : S40 | ND   | 30.60 | 5.06 | ND | ND | ND |
| 1 | NO : S0    | ND   | 15.95 | ND   | ND | ND | ND |
| 1 | NO : S15   | ND   | 12.31 | ND   | ND | ND | ND |
| 1 | NO : S40   | ND   | 13.14 | ND   | ND | ND | ND |
| 1 | N100 : S0  | 4.24 | 28.62 | ND   | ND | ND | ND |

|   |            |       |       |       |    |      |    |
|---|------------|-------|-------|-------|----|------|----|
| 1 | N100 : S15 | ND    | 28.29 | ND    | ND | ND   | ND |
| 1 | N100 : S40 | 4.88  | 36.84 | ND    | ND | ND   | ND |
| 1 | N200 : S0  | 7.30  | 49.88 | 6.74  | ND | 5.31 | ND |
| 1 | N200 : S15 | ND    | 20.19 | ND    | ND | ND   | ND |
| 1 | N200 : S40 | 4.90  | 34.86 | 4.57  | ND | ND   | ND |
| 2 | NO : S0    | 4.82  | 22.99 | ND    | ND | ND   | ND |
| 2 | NO : S15   | ND    | 15.07 | ND    | ND | ND   | ND |
| 2 | NO : S40   | ND    | 22.28 | ND    | ND | ND   | ND |
| 2 | N100 : S0  | 4.47  | 30.22 | 4.35  | ND | ND   | ND |
| 2 | N100 : S15 | 5.56  | 31.81 | 5.18  | ND | ND   | ND |
| 2 | N100 : S40 | 4.71  | 25.89 | ND    | ND | ND   | ND |
| 2 | N200 : S0  | 6.04  | 41.36 | 5.52  | ND | ND   | ND |
| 2 | N200 : S15 | 5.49  | 42.64 | 4.75  | ND | ND   | ND |
| 2 | N200 : S40 | 6.83  | 50.73 | 5.30  | ND | ND   | ND |
| 3 | NO : S0    | 5.91  | 33.24 | 5.90  | ND | 5.03 | ND |
| 3 | NO : S15   | 4.55  | 22.52 | 4.62  | ND | ND   | ND |
| 3 | NO : S40   | 4.12  | 21.88 | 4.07  | ND | ND   | ND |
| 3 | N100 : S0  | 7.15  | 70.48 | 4.65  | ND | 4.76 | ND |
| 3 | N100 : S15 | 5.20  | 31.09 | 4.86  | ND | 4.31 | ND |
| 3 | N100 : S40 | 5.18  | 41.85 | 5.22  | ND | 4.15 | ND |
| 3 | N200 : S0  | 8.01  | 68.13 | 7.30  | ND | 6.73 | ND |
| 3 | N200 : S15 | 5.16  | 35.91 | 4.97  | ND | ND   | ND |
| 3 | N200 : S40 | 12.02 | 81.66 | 10.62 | ND | 9.23 | ND |
| 1 | NO : S0    | ND    | 28.85 | ND    | ND | ND   | ND |
| 1 | NO : S15   | 4.94  | 40.41 | ND    | ND | ND   | ND |
| 1 | NO : S40   | ND    | 31.28 | ND    | ND | ND   | ND |
| 1 | N100 : S0  | ND    | 38.08 | ND    | ND | ND   | ND |
| 1 | N100 : S15 | 6.12  | 50.39 | ND    | ND | ND   | ND |
| 1 | N100 : S40 | 5.47  | 44.83 | ND    | ND | ND   | ND |
| 1 | N200 : S0  | 3.87  | 29.19 | ND    | ND | ND   | ND |
| 1 | N200 : S15 | 5.29  | 39.32 | ND    | ND | ND   | ND |
| 1 | N200 : S40 | 6.88  | 58.47 | ND    | ND | ND   | ND |
| 2 | NO : S0    | ND    | 26.27 | ND    | ND | ND   | ND |
| 2 | NO : S15   | ND    | 31.20 | ND    | ND | ND   | ND |
| 2 | NO : S40   | 5.23  | 41.06 | ND    | ND | ND   | ND |
| 2 | N100 : S0  | 5.70  | 41.87 | ND    | ND | 4.77 | ND |
| 2 | N100 : S15 | 5.33  | 49.67 | ND    | ND | ND   | ND |
| 2 | N100 : S40 | 4.48  | 39.36 | ND    | ND | ND   | ND |
| 2 | N200 : S0  | 5.43  | 43.47 | ND    | ND | ND   | ND |
| 2 | N200 : S15 | 4.34  | 39.75 | ND    | ND | ND   | ND |
| 2 | N200 : S40 | 6.69  | 58.32 | 4.59  | ND | ND   | ND |
| 3 | NO : S0    | ND    | 25.74 | ND    | ND | ND   | ND |
| 3 | NO : S15   | ND    | 35.64 | ND    | ND | ND   | ND |
| 3 | NO : S40   | ND    | 28.72 | ND    | ND | ND   | ND |
| 3 | N100 : S0  | 6.29  | 52.70 | 7.03  | ND | 5.38 | ND |
| 3 | N100 : S15 | 5.83  | 64.74 | ND    | ND | ND   | ND |
| 3 | N100 : S40 | 6.47  | 61.59 | 4.65  | ND | 5.53 | ND |
| 3 | N200 : S0  | ND    | 47.09 | ND    | ND | ND   | ND |
| 3 | N200 : S15 | 5.69  | 55.46 | ND    | ND | 4.65 | ND |
| 3 | N200 : S40 | 5.64  | 67.71 | ND    | ND | ND   | ND |

|   |            |      |       |      |    |    |    |
|---|------------|------|-------|------|----|----|----|
| 1 | NO : S0    | ND   | 13.99 | ND   | ND | ND | ND |
| 1 | NO : S15   | ND   | 15.38 | ND   | ND | ND | ND |
| 1 | NO : S40   | ND   | 16.43 | ND   | ND | ND | ND |
| 1 | N100 : S0  | ND   | 15.84 | ND   | ND | ND | ND |
| 1 | N100 : S15 | ND   | 15.79 | ND   | ND | ND | ND |
| 1 | N100 : S40 | ND   | 19.50 | ND   | ND | ND | ND |
| 1 | N200 : S0  | ND   | 15.51 | ND   | ND | ND | ND |
| 1 | N200 : S15 | 4.32 | 23.86 | 4.83 | ND | ND | ND |
| 1 | N200 : S40 | ND   | 35.37 | ND   | ND | ND | ND |
| 2 | NO : S0    | ND   | 11.62 | ND   | ND | ND | ND |
| 2 | NO : S15   | ND   | 10.95 | ND   | ND | ND | ND |
| 2 | NO : S40   | *    | *     | *    | *  | *  | *  |
| 2 | N100 : S0  | ND   | 25.84 | ND   | ND | ND | ND |
| 2 | N100 : S15 | ND   | 22.62 | ND   | ND | ND | ND |
| 2 | N100 : S40 | ND   | 23.54 | ND   | ND | ND | ND |
| 2 | N200 : S0  | ND   | 28.51 | ND   | ND | ND | ND |
| 2 | N200 : S15 | ND   | 18.95 | ND   | ND | ND | ND |
| 2 | N200 : S40 | ND   | 34.28 | ND   | ND | ND | ND |
| 3 | NO : S0    | ND   | 7.07  | ND   | ND | ND | ND |
| 3 | NO : S15   | ND   | 13.12 | ND   | ND | ND | ND |
| 3 | NO : S40   | ND   | 16.87 | ND   | ND | ND | ND |
| 3 | N100 : S0  | ND   | 22.75 | ND   | ND | ND | ND |
| 3 | N100 : S15 | ND   | 22.59 | ND   | ND | ND | ND |
| 3 | N100 : S40 | ND   | 18.39 | ND   | ND | ND | ND |
| 3 | N200 : S0  | ND   | 43.58 | ND   | ND | ND | ND |
| 3 | N200 : S15 | ND   | 33.75 | ND   | ND | ND | ND |
| 3 | N200 : S40 | *    | *     | *    | *  | *  | *  |
| 1 | NO : S0    | ND   | 13.28 | 4.14 | ND | ND | ND |
| 1 | NO : S15   | ND   | 17.58 | ND   | ND | ND | ND |
| 1 | NO : S40   | ND   | 21.03 | ND   | ND | ND | ND |
| 1 | N100 : S0  | ND   | 18.39 | 4.36 | ND | ND | ND |
| 1 | N100 : S15 | ND   | 19.88 | ND   | ND | ND | ND |
| 1 | N100 : S40 | ND   | 17.20 | ND   | ND | ND | ND |
| 1 | N200 : S0  | 4.60 | 29.82 | 4.73 | ND | ND | ND |
| 1 | N200 : S15 | ND   | 22.22 | ND   | ND | ND | ND |
| 1 | N200 : S40 | ND   | 17.38 | ND   | ND | ND | ND |
| 2 | NO : S0    | ND   | 11.48 | ND   | ND | ND | ND |
| 2 | NO : S15   | ND   | 17.82 | ND   | ND | ND | ND |
| 2 | NO : S40   | ND   | 13.68 | ND   | ND | ND | ND |
| 2 | N100 : S0  | ND   | 19.66 | 4.30 | ND | ND | ND |
| 2 | N100 : S15 | ND   | 14.95 | 4.36 | ND | ND | ND |
| 2 | N100 : S40 | ND   | 22.09 | 4.49 | ND | ND | ND |
| 2 | N200 : S0  | 4.32 | 24.42 | 4.44 | ND | ND | ND |
| 2 | N200 : S15 | 4.81 | 31.61 | 4.62 | ND | ND | ND |
| 2 | N200 : S40 | 4.08 | 29.02 | 4.93 | ND | ND | ND |
| 3 | NO : S0    | ND   | 17.09 | ND   | ND | ND | ND |
| 3 | NO : S15   | ND   | 18.48 | ND   | ND | ND | ND |
| 3 | NO : S40   | ND   | 23.62 | 4.35 | ND | ND | ND |
| 3 | N100 : S0  | 3.73 | 26.28 | 4.11 | ND | ND | ND |
| 3 | N100 : S15 | 4.46 | 25.97 | 4.10 | ND | ND | ND |

|   |            |      |       |      |    |    |    |
|---|------------|------|-------|------|----|----|----|
| 3 | N100 : S40 | ND   | 20.77 | ND   | ND | ND | ND |
| 3 | N200 : S0  | 4.41 | 24.32 | 4.25 | ND | ND | ND |
| 3 | N200 : S15 | 4.60 | 29.21 | ND   | ND | ND | ND |
| 3 | N200 : S40 | 4.64 | 26.02 | 4.33 | ND | ND | ND |

| Rep | Treatment (kg/Ha) | Acrylamide (ppb) | CRISP moisture (%) | Hunter A | Hunter B | Hunter L |
|-----|-------------------|------------------|--------------------|----------|----------|----------|
| 1   | N0 : S0           | 369              | 1.42               | -1.42    | 26.94    | 62.15    |
| 1   | N0 : S15          | 222              | 1.85               | -1.22    | 25.34    | 61.50    |
| 1   | N0 : S40          |                  |                    |          |          |          |
| 1   | N100 : S0         |                  |                    |          |          |          |
| 1   | N100 : S15        |                  |                    |          |          |          |
| 1   | N100 : S40        |                  |                    |          |          |          |
| 1   | N200 : S0         | 218              | 1.24               | -0.62    | 24.25    | 56.55    |
| 1   | N200 : S15        | 351              | 1.37               | -1.04    | 26.81    | 64.90    |
| 1   | N200 : S40        |                  |                    |          |          |          |
| 2   | N0 : S0           | 379              | 2.08               | *        | *        | *        |
| 2   | N0 : S15          | 243              | 1.82               | -0.61    | 27.26    | 65.48    |
| 2   | N0 : S40          |                  |                    |          |          |          |
| 2   | N100 : S0         |                  |                    |          |          |          |
| 2   | N100 : S15        |                  |                    |          |          |          |
| 2   | N100 : S40        |                  |                    |          |          |          |
| 2   | N200 : S0         | 284              | 1.78               | -0.72    | 26.35    | 64.30    |
| 2   | N200 : S15        | 341              | 1.45               | 0.22     | 24.48    | 55.43    |
| 2   | N200 : S40        |                  |                    |          |          |          |
| 3   | N0 : S0           | 444              | 1.30               | -0.02    | 27.21    | 63.56    |
| 3   | N0 : S15          | 559              | 1.25               | -0.39    | 25.80    | 59.10    |
| 3   | N0 : S40          |                  |                    |          |          |          |
| 3   | N100 : S0         |                  |                    |          |          |          |
| 3   | N100 : S15        |                  |                    |          |          |          |
| 3   | N100 : S40        |                  |                    |          |          |          |
| 3   | N200 : S0         | 514              | 1.50               | 0.57     | 23.96    | 55.51    |
| 3   | N200 : S15        | 448              | 1.23               | -0.88    | 24.08    | 55.80    |
| 3   | N200 : S40        |                  |                    |          |          |          |
| 1   | N0 : S0           | 283              | 1.32               | 0.55     | 25.50    | 61.59    |
| 1   | N0 : S15          | 351              | 1.33               | 0.26     | 26.42    | 61.63    |
| 1   | N0 : S40          |                  |                    |          |          |          |
| 1   | N100 : S0         |                  |                    |          |          |          |
| 1   | N100 : S15        |                  |                    |          |          |          |
| 1   | N100 : S40        |                  |                    |          |          |          |
| 1   | N200 : S0         | 1430             | 1.11               | *        | *        | *        |
| 1   | N200 : S15        | 295              | 1.27               | -0.66    | 25.96    | 62.94    |
| 1   | N200 : S40        |                  |                    |          |          |          |
| 2   | N0 : S0           | 312              | 1.38               | -0.06    | 24.51    | 56.33    |
| 2   | N0 : S15          | 278              | 1.30               | *        | *        | *        |
| 2   | N0 : S40          |                  |                    |          |          |          |
| 2   | N100 : S0         |                  |                    |          |          |          |
| 2   | N100 : S15        |                  |                    |          |          |          |
| 2   | N100 : S40        |                  |                    |          |          |          |
| 2   | N200 : S0         | 381              | 2.18               | *        | *        | *        |
| 2   | N200 : S15        | 426              | 1.32               | -0.14    | 25.51    | 61.47    |
| 2   | N200 : S40        |                  |                    |          |          |          |
| 3   | N0 : S0           | 463              | 1.11               | *        | *        | *        |
| 3   | N0 : S15          | 207              | 1.19               | 0.36     | 25.24    | 56.57    |



|   |            |      |      |      |       |       |
|---|------------|------|------|------|-------|-------|
| 3 | N0 : S40   |      |      |      |       |       |
| 3 | N100 : S0  |      |      |      |       |       |
| 3 | N100 : S15 |      |      |      |       |       |
| 3 | N100 : S40 |      |      |      |       |       |
| 3 | N200 : S0  | 821  | 1.06 | *    | *     | *     |
| 3 | N200 : S15 | 500  | 1.19 | 1.72 | 25.58 | 55.68 |
| 3 | N200 : S40 |      |      |      |       |       |
| 1 | N0 : S0    | 2520 | 4.52 | *    | *     | *     |
| 1 | N0 : S15   |      |      |      |       |       |
| 1 | N0 : S40   |      |      |      |       |       |
| 1 | N100 : S0  |      |      |      |       |       |
| 1 | N100 : S15 |      |      |      |       |       |
| 1 | N100 : S40 |      |      |      |       |       |
| 1 | N200 : S0  | 3460 | 8.70 | *    | *     | *     |
| 1 | N200 : S15 |      |      |      |       |       |
| 1 | N200 : S40 |      |      |      |       |       |
| 2 | N0 : S0    |      |      |      |       |       |
| 2 | N0 : S15   |      |      |      |       |       |
| 2 | N0 : S40   |      |      |      |       |       |
| 2 | N100 : S0  |      |      |      |       |       |
| 2 | N100 : S15 |      |      |      |       |       |
| 2 | N100 : S40 |      |      |      |       |       |
| 2 | N200 : S0  | 9070 | 2.04 | *    | *     | *     |
| 2 | N200 : S15 |      |      |      |       |       |
| 2 | N200 : S40 |      |      |      |       |       |
| 3 | N0 : S0    |      |      |      |       |       |
| 3 | N0 : S15   |      |      |      |       |       |
| 3 | N0 : S40   |      |      |      |       |       |
| 3 | N100 : S0  |      |      |      |       |       |
| 3 | N100 : S15 |      |      |      |       |       |
| 3 | N100 : S40 |      |      |      |       |       |
| 3 | N200 : S0  | 9070 | 2.72 | *    | *     | *     |
| 3 | N200 : S15 |      |      |      |       |       |
| 3 | N200 : S40 |      |      |      |       |       |
| 1 | N0 : S0    | 921  | 1.55 | 1.18 | 24.83 | 60.22 |
| 1 | N0 : S15   |      |      |      |       |       |
| 1 | N0 : S40   |      |      |      |       |       |
| 1 | N100 : S0  |      |      |      |       |       |
| 1 | N100 : S15 |      |      |      |       |       |
| 1 | N100 : S40 |      |      |      |       |       |
| 1 | N200 : S0  | 517  | 4.38 | 1.97 | 21.25 | 55.69 |
| 1 | N200 : S15 |      |      |      |       |       |
| 1 | N200 : S40 |      |      |      |       |       |
| 2 | N0 : S0    |      |      |      |       |       |
| 2 | N0 : S15   |      |      |      |       |       |
| 2 | N0 : S40   |      |      |      |       |       |
| 2 | N100 : S0  |      |      |      |       |       |
| 2 | N100 : S15 |      |      |      |       |       |
| 2 | N100 : S40 |      |      |      |       |       |
| 2 | N200 : S0  | 2360 | 2.46 | *    | *     | *     |

|   |            |      |      |       |       |       |
|---|------------|------|------|-------|-------|-------|
| 2 | N200 : S15 |      |      |       |       |       |
| 2 | N200 : S40 |      |      |       |       |       |
| 3 | NO : S15   |      |      |       |       |       |
| 3 | NO : S40   |      |      |       |       |       |
| 3 | N100 : S0  |      |      |       |       |       |
| 3 | N100 : S15 |      |      |       |       |       |
| 3 | N100 : S40 |      |      |       |       |       |
| 3 | N200 : S0  | 2040 | 1.35 | *     | *     | *     |
| 3 | N200 : S15 |      |      |       |       |       |
| 3 | N200 : S40 |      |      |       |       |       |
| 3 | NO : S0    |      |      |       |       |       |
| 1 | NO : S0    | 203  | 1.65 | -2.68 | 20.21 | 60.17 |
| 1 | NO : S15   | 122  | 1.21 | -0.04 | 21.03 | 62.06 |
| 1 | NO : S40   |      |      |       |       |       |
| 1 | N100 : S0  |      |      |       |       |       |
| 1 | N100 : S15 |      |      |       |       |       |
| 1 | N100 : S40 |      |      |       |       |       |
| 1 | N200 : S0  | 164  | 1.71 | -1.12 | 22.52 | 59.44 |
| 1 | N200 : S15 | 180  | 3.17 | -1.42 | 22.58 | 61.28 |
| 1 | N200 : S40 |      |      |       |       |       |
| 2 | NO : S0    | 137  | 1.90 | -1.49 | 22.07 | 63.45 |
| 2 | NO : S15   | 120  | 1.55 | -1.46 | 21.89 | 62.02 |
| 2 | NO : S40   |      |      |       |       |       |
| 2 | N100 : S40 |      |      |       |       |       |
| 2 | N200 : S0  | 158  | 1.51 | -0.34 | 21.15 | 58.44 |
| 2 | N200 : S15 | 182  | 1.90 | -0.16 | 21.62 | 56.24 |
| 2 | N200 : S40 |      |      |       |       |       |
| 3 | NO : S0    | 153  | 4.82 | *     | *     | *     |
| 3 | NO : S15   | 92   | 1.60 | -0.87 | 21.69 | 57.43 |
| 3 | NO : S40   |      |      |       |       |       |
| 3 | N100 : S0  |      |      |       |       |       |
| 3 | N100 : S15 |      |      |       |       |       |
| 3 | N100 : S40 |      |      |       |       |       |
| 3 | N200 : S0  | 126  | 1.99 | -1.61 | 21.86 | 62.72 |
| 3 | N200 : S15 | 228  | 2.44 | -0.93 | 21.66 | 56.46 |
| 3 | N200 : S40 |      |      |       |       |       |
| 2 | N100 : S0  |      |      |       |       |       |
| 2 | N100 : S15 |      |      |       |       |       |
| 1 | NO : S0    | 191  | 1.44 | -1.28 | 23.76 | 62.07 |
| 1 | NO : S15   | 201  | 1.60 | -1.04 | 23.54 | 60.28 |
| 1 | NO : S40   |      |      |       |       |       |
| 1 | N100 : S0  |      |      |       |       |       |
| 1 | N100 : S15 |      |      |       |       |       |
| 1 | N100 : S40 |      |      |       |       |       |
| 1 | N200 : S0  | 54   | 1.95 | -1.44 | 23.67 | 64.04 |
| 1 | N200 : S15 | 308  | 1.50 | -1.09 | 24.22 | 61.71 |
| 1 | N200 : S40 |      |      |       |       |       |
| 2 | NO : S0    | 1540 | 1.46 | 0.06  | 22.62 | 59.31 |
| 2 | NO : S15   | 671  | 1.90 | -1.69 | 23.43 | 66.66 |
| 2 | NO : S40   |      |      |       |       |       |

|   |            |     |      |       |       |       |
|---|------------|-----|------|-------|-------|-------|
| 2 | N100 : S0  |     |      |       |       |       |
| 2 | N100 : S15 |     |      |       |       |       |
| 2 | N100 : S40 |     |      |       |       |       |
| 2 | N200 : S0  | 112 | 1.98 | -0.43 | 21.70 | 56.08 |
| 2 | N200 : S15 | 137 | 4.93 | -0.77 | 22.62 | 59.52 |
| 2 | N200 : S40 |     |      |       |       |       |
| 3 | NO : S0    | 151 | 4.82 | -2.11 | 22.66 | 61.78 |
| 3 | NO : S15   | 103 | 6.02 | -1.02 | 22.12 | 57.47 |
| 3 | NO : S40   |     |      |       |       |       |
| 3 | N100 : S0  |     |      |       |       |       |
| 3 | N100 : S15 |     |      |       |       |       |
| 3 | N100 : S40 |     |      |       |       |       |
| 3 | N200 : S0  | 123 | 4.88 | -0.86 | 22.94 | 61.37 |
| 3 | N200 : S15 | 116 | 5.59 | -0.32 | 23.51 | 58.04 |
| 3 | N200 : S40 |     |      |       |       |       |
| 1 | NO : S0    | 315 | 1.42 | *     | *     | *     |
| 1 | NO : S15   | 222 | 2.14 | *     | *     | *     |
| 1 | NO : S40   |     |      |       |       |       |
| 1 | N100 : S0  |     |      |       |       |       |
| 1 | N100 : S15 |     |      |       |       |       |
| 1 | N100 : S40 |     |      |       |       |       |
| 1 | N200 : S0  | 303 | 2.00 | *     | *     | *     |
| 1 | N200 : S15 | 235 | 2.75 | *     | *     | *     |
| 1 | N200 : S40 |     |      |       |       |       |
| 2 | NO : S0    | 315 | 1.75 | *     | *     | *     |
| 2 | NO : S15   | 284 | 2.04 | *     | *     | *     |
| 2 | NO : S40   |     |      |       |       |       |
| 2 | N100 : S0  |     |      |       |       |       |
| 2 | N100 : S15 |     |      |       |       |       |
| 2 | N100 : S40 |     |      |       |       |       |
| 2 | N200 : S0  | 274 | 1.65 | -1.28 | 24.41 | 61.97 |
| 2 | N200 : S15 | 694 | 2.21 | *     | *     | *     |
| 2 | N200 : S40 |     |      |       |       |       |
| 3 | NO : S0    | 233 | 1.76 | *     | *     | *     |
| 3 | NO : S15   | 635 | 1.38 | *     | *     | *     |
| 3 | NO : S40   |     |      |       |       |       |
| 3 | N100 : S0  |     |      |       |       |       |
| 3 | N100 : S15 |     |      |       |       |       |
| 3 | N100 : S40 |     |      |       |       |       |
| 3 | N200 : S0  | 163 | 2.09 | *     | *     | *     |
| 3 | N200 : S15 | 249 | 2.14 | -1.14 | 23.42 | 56.81 |
| 3 | N200 : S40 |     |      |       |       |       |
| 1 | NO : S0    | 277 | 1.70 | -2.01 | 23.21 | 64.79 |
| 1 | NO : S15   | 243 | 1.72 | -2.06 | 22.47 | 56.10 |
| 1 | NO : S40   |     |      |       |       |       |
| 1 | N100 : S0  |     |      |       |       |       |
| 1 | N100 : S15 |     |      |       |       |       |
| 1 | N100 : S40 |     |      |       |       |       |
| 1 | N200 : S0  | 368 | 1.17 | -0.97 | 25.00 | 64.01 |
| 1 | N200 : S15 | 363 | 2.72 | 0.02  | 24.96 | 56.71 |

|   |            |      |      |       |       |       |
|---|------------|------|------|-------|-------|-------|
| 1 | N200 : S40 |      |      |       |       |       |
| 2 | NO : S0    | 233  | 1.47 | -0.42 | 24.27 | 62.00 |
| 2 | NO : S15   | 169  | 1.35 | -2.84 | 21.75 | 67.77 |
| 2 | NO : S40   |      |      |       |       |       |
| 2 | N100 : S0  |      |      |       |       |       |
| 2 | N100 : S15 |      |      |       |       |       |
| 2 | N100 : S40 |      |      |       |       |       |
| 2 | N200 : S0  | 259  | 1.11 | -0.98 | 23.51 | 62.02 |
| 2 | N200 : S15 | 207  | 1.43 | *     | *     | *     |
| 2 | N200 : S40 |      |      |       |       |       |
| 3 | NO : S0    | 270  | 1.23 | -0.08 | 21.37 | 55.46 |
| 3 | NO : S15   | 224  | 1.26 | -0.40 | 21.32 | 57.91 |
| 3 | NO : S40   |      |      |       |       |       |
| 3 | N100 : S0  |      |      |       |       |       |
| 3 | N100 : S15 |      |      |       |       |       |
| 3 | N100 : S40 |      |      |       |       |       |
| 3 | N200 : S0  | 404  | 1.19 | 0.42  | 22.47 | 57.95 |
| 3 | N200 : S15 | 360  | 1.03 | 0.75  | 21.96 | 52.99 |
| 3 | N200 : S40 |      |      |       |       |       |
| 1 | NO : S0    | 1100 | 4.32 | *     | *     | *     |
| 1 | NO : S15   | 1390 | 1.64 | 2.09  | 23.53 | 57.88 |
| 1 | NO : S40   |      |      |       |       |       |
| 1 | N100 : S0  |      |      |       |       |       |
| 1 | N100 : S15 |      |      |       |       |       |
| 1 | N100 : S40 |      |      |       |       |       |
| 1 | N200 : S0  | 569  | 2.60 | *     | *     | *     |
| 1 | N200 : S15 | 130  | 4.37 | *     | *     | *     |
| 1 | N200 : S40 |      |      |       |       |       |
| 2 | NO : S0    | 1280 | 2.50 | 0.96  | 22.87 | 58.44 |
| 2 | NO : S15   | 1090 | 5.43 | *     | *     | *     |
| 2 | NO : S40   |      |      |       |       |       |
| 2 | N100 : S0  |      |      |       |       |       |
| 2 | N100 : S15 |      |      |       |       |       |
| 2 | N100 : S40 |      |      |       |       |       |
| 2 | N200 : S0  | 813  | 2.43 | *     | *     | *     |
| 2 | N200 : S15 | 907  | 1.49 | *     | *     | *     |
| 2 | N200 : S40 |      |      |       |       |       |
| 3 | NO : S0    | 1600 | 1.60 | *     | *     | *     |
| 3 | NO : S15   | 806  | 4.69 | *     | *     | *     |
| 3 | NO : S40   |      |      |       |       |       |
| 3 | N100 : S0  |      |      |       |       |       |
| 3 | N100 : S15 |      |      |       |       |       |
| 3 | N100 : S40 |      |      |       |       |       |
| 3 | N200 : S0  | 750  | 3.81 | *     | *     | *     |
| 3 | N200 : S15 |      |      |       |       |       |
| 3 | N200 : S40 |      |      |       |       |       |
| 1 | NO : S0    | 1820 | 1.59 | *     | *     | *     |
| 1 | NO : S15   | 2070 | 1.52 | *     | *     | *     |
| 1 | NO : S40   |      |      |       |       |       |
| 1 | N100 : S0  |      |      |       |       |       |

|   |            |      |      |       |       |       |
|---|------------|------|------|-------|-------|-------|
| 1 | N100 : S15 |      |      |       |       |       |
| 1 | N100 : S40 |      |      |       |       |       |
| 1 | N200 : S0  | 1490 | 1.29 | 1.86  | 22.34 | 54.46 |
| 1 | N200 : S15 | 2190 | 1.10 | *     | *     | *     |
| 1 | N200 : S40 |      |      |       |       |       |
| 2 | NO : S0    | 1370 | *    | *     | *     | *     |
| 2 | NO : S15   | 1810 | *    | *     | *     | *     |
| 2 | NO : S40   |      |      |       |       |       |
| 2 | N100 : S0  |      |      |       |       |       |
| 2 | N100 : S15 |      |      |       |       |       |
| 2 | N100 : S40 |      |      |       |       |       |
| 2 | N200 : S0  | 4500 | 1.16 | *     | *     | *     |
| 2 | N200 : S15 | 3600 | 1.09 | *     | *     | *     |
| 2 | N200 : S40 |      |      |       |       |       |
| 3 | NO : S0    | 2690 | 1.21 | *     | *     | *     |
| 3 | NO : S15   | 3430 | 1.15 | *     | *     | *     |
| 3 | NO : S40   |      |      |       |       |       |
| 3 | N100 : S0  |      |      |       |       |       |
| 3 | N100 : S15 |      |      |       |       |       |
| 3 | N100 : S40 |      |      |       |       |       |
| 3 | N200 : S0  | 3680 | 1.23 | *     | *     | *     |
| 3 | N200 : S15 | 2960 | 1.23 | *     | *     | *     |
| 3 | N200 : S40 |      |      |       |       |       |
| 1 | NO : S0    | 518  | 0.98 | 0.25  | 23.08 | 59.17 |
| 1 | NO : S15   | 443  | 1.00 | *     | *     | *     |
| 1 | NO : S40   |      |      |       |       |       |
| 1 | N100 : S0  |      |      |       |       |       |
| 1 | N100 : S15 |      |      |       |       |       |
| 1 | N100 : S40 |      |      |       |       |       |
| 1 | N200 : S0  | 476  | 1.02 | 0.31  | 22.06 | 55.78 |
| 1 | N200 : S15 | 407  | 0.93 | *     | *     | *     |
| 1 | N200 : S40 |      |      |       |       |       |
| 2 | NO : S0    | 459  | 0.87 | -0.34 | 22.28 | 56.50 |
| 2 | NO : S15   | 688  | 0.92 | *     | *     | *     |
| 2 | NO : S40   |      |      |       |       |       |
| 2 | N100 : S0  |      |      |       |       |       |
| 2 | N100 : S15 |      |      |       |       |       |
| 2 | N100 : S40 |      |      |       |       |       |
| 2 | N200 : S0  | 1040 | 1.04 | *     | *     | *     |
| 2 | N200 : S15 | 840  | 1.03 | *     | *     | *     |
| 2 | N200 : S40 |      |      |       |       |       |
| 3 | NO : S0    | 1030 | 1.21 | *     | *     | *     |
| 3 | NO : S15   | 1060 | 2.34 | *     | *     | *     |
| 3 | NO : S40   |      |      |       |       |       |
| 3 | N100 : S0  |      |      |       |       |       |
| 3 | N100 : S15 |      |      |       |       |       |
| 3 | N100 : S40 |      |      |       |       |       |
| 3 | N200 : S0  | 1180 | 2.02 | *     | *     | *     |
| 3 | N200 : S15 | 794  | 3.34 | *     | *     | *     |
| 3 | N200 : S40 |      |      |       |       |       |

|   |            |     |      |       |       |       |
|---|------------|-----|------|-------|-------|-------|
| 1 | NO : S0    | 541 | 1.02 | -0.56 | 24.88 | 58.87 |
| 1 | NO : S15   | 617 | 1.10 | *     | *     | *     |
| 1 | NO : S40   |     |      |       |       |       |
| 1 | N100 : S0  |     |      |       |       |       |
| 1 | N100 : S15 |     |      |       |       |       |
| 1 | N100 : S40 |     |      |       |       |       |
| 1 | N200 : S0  | 331 | 1.09 | -1.23 | 25.47 | 59.75 |
| 1 | N200 : S15 | 515 | 1.12 | *     | *     | *     |
| 1 | N200 : S40 |     |      |       |       |       |
| 2 | NO : S0    | 368 | 1.15 | -1.41 | 25.70 | 60.69 |
| 2 | NO : S15   | 275 | 1.12 | -1.08 | 25.85 | 62.49 |
| 2 | NO : S40   |     |      |       |       |       |
| 2 | N100 : S0  |     |      |       |       |       |
| 2 | N100 : S15 |     |      |       |       |       |
| 2 | N100 : S40 |     |      |       |       |       |
| 2 | N200 : S0  | 820 | 1.31 | *     | *     | *     |
| 2 | N200 : S15 | 469 | 1.00 | *     | *     | *     |
| 2 | N200 : S40 |     |      |       |       |       |
| 3 | NO : S0    | 339 | 1.05 | -1.16 | 25.71 | 60.66 |
| 3 | NO : S15   | 451 | 1.10 | *     | *     | *     |
| 3 | NO : S40   |     |      |       |       |       |
| 3 | N100 : S0  |     |      |       |       |       |
| 3 | N100 : S15 |     |      |       |       |       |
| 3 | N100 : S40 |     |      |       |       |       |
| 3 | N200 : S0  | 683 | 1.02 | *     | *     | *     |
| 3 | N200 : S15 | 906 | 0.97 | *     | *     | *     |
| 3 | N200 : S40 |     |      |       |       |       |
| 1 | NO : S0    | 334 | 2.66 | -0.74 | 24.58 | 63.84 |
| 1 | NO : S15   | 289 | 1.41 | -0.88 | 22.68 | 59.18 |
| 1 | NO : S40   |     |      |       |       |       |
| 1 | N100 : S0  |     |      |       |       |       |
| 1 | N100 : S15 |     |      |       |       |       |
| 1 | N100 : S40 |     |      |       |       |       |
| 1 | N200 : S0  | 367 | 2.28 | *     | *     | *     |
| 1 | N200 : S15 | 234 | 1.56 | -2.27 | 23.50 | 56.92 |
| 1 | N200 : S40 |     |      |       |       |       |
| 2 | NO : S0    | 435 | 1.83 | -1.21 | 22.63 | 57.59 |
| 2 | NO : S15   | 315 | 2.48 | -1.05 | 22.20 | 59.38 |
| 2 | NO : S40   |     |      |       |       |       |
| 2 | N100 : S0  |     |      |       |       |       |
| 2 | N100 : S15 |     |      |       |       |       |
| 2 | N100 : S40 |     |      |       |       |       |
| 2 | N200 : S0  | 725 | 2.85 | *     | *     | *     |
| 2 | N200 : S15 | 756 | 2.20 | *     | *     | *     |
| 2 | N200 : S40 |     |      |       |       |       |
| 3 | NO : S0    | 660 | 3.08 | *     | *     | *     |
| 3 | NO : S15   | 626 | 2.76 | *     | *     | *     |
| 3 | NO : S40   |     |      |       |       |       |
| 3 | N100 : S0  |     |      |       |       |       |
| 3 | N100 : S15 |     |      |       |       |       |

|   |            |     |      |   |   |   |
|---|------------|-----|------|---|---|---|
| 3 | N100 : S40 |     |      |   |   |   |
| 3 | N200 : S0  | 721 | 3.19 | * | * | * |
| 3 | N200 : S15 | 381 | 2.60 | * | * | * |
| 3 | N200 : S40 |     |      |   |   |   |
